# Supplementary material for: Volume Electron Microscopy Reveals Unique Laminar Synaptic Characteristics in the Human Entorhinal Cortex
Source: bioRxiv preprint, doi:10.1101/2023.11.20.567821, version 3 (2024-10-29)
Supplement: Supplementary File 4 [file 567821_file05.xlsx]

## Sheet: RAW DATA SYNAPSES
CASE	LAYER	STACK	TYPE	SHAPE	POST	CORRECTED SAS AREA (nm2)	SAS SAREA (nm2)
AB2	III	AB2-LIII-S1	Asymmetric	MACULAR	SPINE HEAD	15419.1	14339.7
AB2	III	AB2-LIII-S1	Asymmetric	MACULAR	PUT SPINE HEAD	16986.3	15797.3
AB2	III	AB2-LIII-S1	Asymmetric	MACULAR	SPINE HEAD	22412.2	20843.3
AB2	III	AB2-LIII-S1	Asymmetric	MACULAR	SPINE HEAD	24847	23107.8
AB2	III	AB2-LIII-S1	Asymmetric	MACULAR	UNKNOWN	26433.6	24583.2
AB2	III	AB2-LIII-S1	Asymmetric	MACULAR	PUT SPINE HEAD	27609.2	25676.5
AB2	III	AB2-LIII-S1	Asymmetric	MACULAR	ASPINY SHAFT	28720.4	26710
AB2	III	AB2-LIII-S1	Asymmetric	MACULAR	SPINY SHAFT	31167.8	28986.1
AB2	III	AB2-LIII-S1	Asymmetric	MACULAR	UNKNOWN	31512.4	29306.5
AB2	III	AB2-LIII-S1	Symmetric	MACULAR	ASPINY SHAFT	27117.9	25219.7
AB2	III	AB2-LIII-S1	Asymmetric	MACULAR	UNKNOWN	35704.4	33205.1
AB2	III	AB2-LIII-S1	Asymmetric	MACULAR	SPINE HEAD	37572.5	34942.4
AB2	III	AB2-LIII-S1	Asymmetric	MACULAR	PUT SPINE HEAD	40705.1	37855.7
AB2	III	AB2-LIII-S1	Asymmetric	MACULAR	PUT SPINE HEAD	42497.4	39522.6
AB2	III	AB2-LIII-S1	Asymmetric	MACULAR	SPINE HEAD	43442	40401.1
AB2	III	AB2-LIII-S1	Asymmetric	MACULAR	SPINE HEAD	44359.3	41254.2
AB2	III	AB2-LIII-S1	Asymmetric	MACULAR	SPINE HEAD	46561.6	43302.3
AB2	III	AB2-LIII-S1	Asymmetric	MACULAR	SPINE HEAD	47442.1	44121.1
AB2	III	AB2-LIII-S1	Asymmetric	MACULAR	SPINE HEAD	48612.9	45210
AB2	III	AB2-LIII-S1	Asymmetric	MACULAR	SPINE HEAD	49661	46184.7
AB2	III	AB2-LIII-S1	Asymmetric	MACULAR	PUT SPINE HEAD	51465.8	47863.2
AB2	III	AB2-LIII-S1	Asymmetric	MACULAR	SPINE HEAD	52107.2	48459.7
AB2	III	AB2-LIII-S1	Asymmetric	MACULAR	SPINE HEAD	56744.9	52772.8
AB2	III	AB2-LIII-S1	Asymmetric	MACULAR	SPINE HEAD	58474.9	54381.6
AB2	III	AB2-LIII-S1	Asymmetric	MACULAR	SPINE HEAD	62651.2	58265.6
AB2	III	AB2-LIII-S1	Asymmetric	MACULAR	SPINE HEAD	62937	58531.4
AB2	III	AB2-LIII-S1	Asymmetric	MACULAR	ASPINY SHAFT	63003.2	58593
AB2	III	AB2-LIII-S1	Asymmetric	MACULAR	PUT SPINE HEAD	65418.6	60839.3
AB2	III	AB2-LIII-S1	Asymmetric	MACULAR	PUT SPINE HEAD	66944.1	62258
AB2	III	AB2-LIII-S1	Asymmetric	MACULAR	SPINE HEAD	75627.6	70333.7
AB2	III	AB2-LIII-S1	Asymmetric	MACULAR	SPINY SHAFT	75813.1	70506.2
AB2	III	AB2-LIII-S1	Asymmetric	MACULAR	UNKNOWN	78820.7	73303.3
AB2	III	AB2-LIII-S1	Asymmetric	MACULAR	PUT SPINE HEAD	79446.4	73885.2
AB2	III	AB2-LIII-S1	Asymmetric	MACULAR	SPINE HEAD	79701.4	74122.3
AB2	III	AB2-LIII-S1	Asymmetric	MACULAR	SPINE HEAD	79935.6	74340.1
AB2	III	AB2-LIII-S1	Asymmetric	PERFORATED	ASPINY SHAFT	81167.6	75485.9
AB2	III	AB2-LIII-S1	Asymmetric	MACULAR	SPINE HEAD	83047.5	77234.2
AB2	III	AB2-LIII-S1	Asymmetric	MACULAR	ASPINY SHAFT	86053.8	80030.1
AB2	III	AB2-LIII-S1	Asymmetric	MACULAR	SPINE HEAD	86803.8	80727.5
AB2	III	AB2-LIII-S1	Asymmetric	MACULAR	PUT SPINE HEAD	89067	82832.3
AB2	III	AB2-LIII-S1	Asymmetric	MACULAR	UNKNOWN	91817.7	85390.4
AB2	III	AB2-LIII-S1	Asymmetric	MACULAR	SPINY SHAFT	92304	85842.7
AB2	III	AB2-LIII-S1	Asymmetric	MACULAR	PUT SPINE HEAD	93893.6	87321.1
AB2	III	AB2-LIII-S1	Asymmetric	MACULAR	PUT SPINE HEAD	94875	88233.7
AB2	III	AB2-LIII-S1	Asymmetric	PERFORATED	ASPINY SHAFT	95076.9	88421.5
AB2	III	AB2-LIII-S1	Asymmetric	MACULAR	PUT SPINE HEAD	95146.3	88486.1
AB2	III	AB2-LIII-S1	Asymmetric	MACULAR	PUT SPINE HEAD	99862.6	92872.2
AB2	III	AB2-LIII-S1	Asymmetric	MACULAR	SPINE HEAD	102663	95476.3
AB2	III	AB2-LIII-S1	Asymmetric	MACULAR	ASPINY SHAFT	103237	96010.1
AB2	III	AB2-LIII-S1	Asymmetric	MACULAR	ASPINY SHAFT	105836	98427.2
AB2	III	AB2-LIII-S1	Asymmetric	MACULAR	PUT SPINE HEAD	108956	101329
AB2	III	AB2-LIII-S1	Asymmetric	MACULAR	PUT SPINE HEAD	115673	107576
AB2	III	AB2-LIII-S1	Asymmetric	MACULAR	SPINY SHAFT	118032	109770
AB2	III	AB2-LIII-S1	Asymmetric	PERFORATED	SPINE HEAD	119184	110841
AB2	III	AB2-LIII-S1	Asymmetric	MACULAR	ASPINY SHAFT	119432	111071
AB2	III	AB2-LIII-S1	Asymmetric	MACULAR	SPINE HEAD	120660	112214
AB2	III	AB2-LIII-S1	Asymmetric	MACULAR	SPINE HEAD	121392	112894
AB2	III	AB2-LIII-S1	Asymmetric	MACULAR	SPINY SHAFT	122573	113993
AB2	III	AB2-LIII-S1	Asymmetric	MACULAR	SPINY SHAFT	122763	114170
AB2	III	AB2-LIII-S1	Asymmetric	MACULAR	PUT SPINE HEAD	126589	117728
AB2	III	AB2-LIII-S1	Asymmetric	MACULAR	ASPINY SHAFT	128078	119112
AB2	III	AB2-LIII-S1	Asymmetric	MACULAR	SPINY SHAFT	129121	120083
AB2	III	AB2-LIII-S1	Asymmetric	MACULAR	PUT SPINE HEAD	131915	122681
AB2	III	AB2-LIII-S1	Asymmetric	MACULAR	ASPINY SHAFT	134058	124674
AB2	III	AB2-LIII-S1	Asymmetric	HORSESHOE	SPINE HEAD	134985	125536
AB2	III	AB2-LIII-S1	Asymmetric	MACULAR	SPINY SHAFT	136683	127115
AB2	III	AB2-LIII-S1	Asymmetric	MACULAR	ASPINY SHAFT	137333	127720
AB2	III	AB2-LIII-S1	Asymmetric	MACULAR	ASPINY SHAFT	141901	131968
AB2	III	AB2-LIII-S1	Asymmetric	MACULAR	ASPINY SHAFT	142109	132162
AB2	III	AB2-LIII-S1	Asymmetric	PERFORATED	SPINE HEAD	143821	133753
AB2	III	AB2-LIII-S1	Asymmetric	MACULAR	SPINY SHAFT	143869	133798
AB2	III	AB2-LIII-S1	Asymmetric	MACULAR	ASPINY SHAFT	147206	136901
AB2	III	AB2-LIII-S1	Asymmetric	MACULAR	SPINE HEAD	147323	137011
AB2	III	AB2-LIII-S1	Asymmetric	MACULAR	ASPINY SHAFT	153035	142323
AB2	III	AB2-LIII-S1	Asymmetric	PERFORATED	SPINE HEAD	157168	146167
AB2	III	AB2-LIII-S1	Asymmetric	MACULAR	SPINY SHAFT	158247	147170
AB2	III	AB2-LIII-S1	Symmetric	PERFORATED	ASPINY SHAFT	83238.3	77411.6
AB2	III	AB2-LIII-S1	Asymmetric	PERFORATED	PUT SPINE HEAD	161181	149899
AB2	III	AB2-LIII-S1	Asymmetric	MACULAR	SPINY SHAFT	164637	153113
AB2	III	AB2-LIII-S1	Asymmetric	MACULAR	SPINY SHAFT	165029	153477
AB2	III	AB2-LIII-S1	Asymmetric	MACULAR	ASPINY SHAFT	169945	158049
AB2	III	AB2-LIII-S1	Asymmetric	PERFORATED	SPINE HEAD	170101	158194
AB2	III	AB2-LIII-S1	Asymmetric	MACULAR	SPINY SHAFT	170721	158771
AB2	III	AB2-LIII-S1	Asymmetric	MACULAR	ASPINY SHAFT	170854	158894
AB2	III	AB2-LIII-S1	Asymmetric	PERFORATED	ASPINY SHAFT	171056	159082
AB2	III	AB2-LIII-S1	Asymmetric	MACULAR	SPINE HEAD	175948	163632
AB2	III	AB2-LIII-S1	Asymmetric	PERFORATED	SPINE HEAD	177071	164676
AB2	III	AB2-LIII-S1	Asymmetric	MACULAR	SPINY SHAFT	177483	165059
AB2	III	AB2-LIII-S1	Asymmetric	MACULAR	PUT SPINE HEAD	178368	165882
AB2	III	AB2-LIII-S1	Asymmetric	MACULAR	SPINY SHAFT	179756	167173
AB2	III	AB2-LIII-S1	Asymmetric	MACULAR	SPINY SHAFT	180333	167710
AB2	III	AB2-LIII-S1	Asymmetric	PERFORATED	ASPINY SHAFT	180443	167812
AB2	III	AB2-LIII-S1	Asymmetric	MACULAR	SPINY SHAFT	181723	169003
AB2	III	AB2-LIII-S1	Asymmetric	MACULAR	SPINE HEAD	184293	171393
AB2	III	AB2-LIII-S1	Asymmetric	MACULAR	SPINY SHAFT	186168	173136
AB2	III	AB2-LIII-S1	Asymmetric	MACULAR	SPINY SHAFT	188355	175170
AB2	III	AB2-LIII-S1	Asymmetric	MACULAR	PUT SPINE HEAD	189386	176129
AB2	III	AB2-LIII-S1	Asymmetric	PERFORATED	SPINE HEAD	190520	177183
AB2	III	AB2-LIII-S1	Asymmetric	MACULAR	SPINY SHAFT	190694	177346
AB2	III	AB2-LIII-S1	Asymmetric	PERFORATED	PUT SPINE HEAD	195626	181932
AB2	III	AB2-LIII-S1	Asymmetric	MACULAR	ASPINY SHAFT	196735	182963
AB2	III	AB2-LIII-S1	Asymmetric	PERFORATED	SPINY SHAFT	196991	183201
AB2	III	AB2-LIII-S1	Asymmetric	MACULAR	SPINY SHAFT	198091	184224
AB2	III	AB2-LIII-S1	Asymmetric	MACULAR	ASPINY SHAFT	198880	184959
AB2	III	AB2-LIII-S1	Asymmetric	PERFORATED	SPINE HEAD	203242	189015
AB2	III	AB2-LIII-S1	Asymmetric	PERFORATED	UNKNOWN	204303	190001
AB2	III	AB2-LIII-S1	Asymmetric	MACULAR	ASPINY SHAFT	204954	190607
AB2	III	AB2-LIII-S1	Asymmetric	MACULAR	PUT SPINE HEAD	210805	196049
AB2	III	AB2-LIII-S1	Asymmetric	MACULAR	UNKNOWN	214825	199787
AB2	III	AB2-LIII-S1	Asymmetric	PERFORATED	SPINE HEAD	217595	202364
AB2	III	AB2-LIII-S1	Asymmetric	MACULAR	SPINE HEAD	220064	204659
AB2	III	AB2-LIII-S1	Asymmetric	MACULAR	ASPINY SHAFT	222733	207142
AB2	III	AB2-LIII-S1	Asymmetric	MACULAR	SPINY SHAFT	223913	208239
AB2	III	AB2-LIII-S1	Asymmetric	PERFORATED	SPINE HEAD	225644	209849
AB2	III	AB2-LIII-S1	Asymmetric	MACULAR	SPINE HEAD	228040	212078
AB2	III	AB2-LIII-S1	Asymmetric	MACULAR	SPINE HEAD	229703	213624
AB2	III	AB2-LIII-S1	Symmetric	MACULAR	SPINY SHAFT	120199	111785
AB2	III	AB2-LIII-S1	Symmetric	MACULAR	SPINY SHAFT	120307	111885
AB2	III	AB2-LIII-S1	Asymmetric	PERFORATED	SPINE HEAD	249087	231651
AB2	III	AB2-LIII-S1	Asymmetric	MACULAR	SPINY SHAFT	256485	238531
AB2	III	AB2-LIII-S1	Asymmetric	PERFORATED	SPINY SHAFT	263060	244646
AB2	III	AB2-LIII-S1	Asymmetric	PERFORATED	SPINE HEAD	269614	250741
AB2	III	AB2-LIII-S1	Asymmetric	PERFORATED	SPINE HEAD	274422	255212
AB2	III	AB2-LIII-S1	Asymmetric	PERFORATED	PUT SPINE HEAD	282539	262761
AB2	III	AB2-LIII-S1	Asymmetric	MACULAR	ASPINY SHAFT	304953	283607
AB2	III	AB2-LIII-S1	Asymmetric	MACULAR	SPINY SHAFT	318592	296291
AB2	III	AB2-LIII-S1	Asymmetric	PERFORATED	PUT SPINE HEAD	319321	296968
AB2	III	AB2-LIII-S1	Asymmetric	PERFORATED	PUT SPINE HEAD	339996	316197
AB2	III	AB2-LIII-S1	Asymmetric	PERFORATED	PUT SPINE HEAD	347667	323330
AB2	III	AB2-LIII-S1	Asymmetric	MACULAR	SPINY SHAFT	357560	332531
AB2	III	AB2-LIII-S1	Asymmetric	MACULAR	SPINY SHAFT	357566	332536
AB2	III	AB2-LIII-S1	Asymmetric	FRAGMENTED	SPINE HEAD	367824	342077
AB2	III	AB2-LIII-S1	Asymmetric	PERFORATED	SPINE HEAD	428798	398782
AB2	III	AB2-LIII-S1	Asymmetric	PERFORATED	SPINE HEAD	480544	446906
AB2	III	AB2-LIII-S1	Asymmetric	PERFORATED	SPINE HEAD	485943	451927
AB2	III	AB2-LIII-S1	Asymmetric	PERFORATED	ASPINY SHAFT	491400	457002
AB2	III	AB2-LIII-S1	Asymmetric	PERFORATED	SPINE HEAD	509718	474038
AB2	III	AB2-LIII-S1	Asymmetric	PERFORATED	SPINE HEAD	535102	497645
AB2	III	AB2-LIII-S1	Symmetric	MACULAR	SPINE HEAD	249328	231875
AB2	III	AB2-LIII-S2	Asymmetric	MACULAR	PUT SPINE HEAD	22991.3	21381.9
AB2	III	AB2-LIII-S2	Asymmetric	MACULAR	UNKNOWN	25584.3	23793.4
AB2	III	AB2-LIII-S2	Asymmetric	MACULAR	PUT SPINE HEAD	28369.4	26383.6
AB2	III	AB2-LIII-S2	Asymmetric	MACULAR	SPINE HEAD	29402.9	27344.7
AB2	III	AB2-LIII-S2	Asymmetric	MACULAR	PUT SPINE HEAD	30378.1	28251.7
AB2	III	AB2-LIII-S2	Asymmetric	MACULAR	SPINE HEAD	31177	28994.6
AB2	III	AB2-LIII-S2	Symmetric	MACULAR	ASPINY SHAFT	23358.8	21723.7
AB2	III	AB2-LIII-S2	Asymmetric	MACULAR	UNKNOWN	35545.3	33057.1
AB2	III	AB2-LIII-S2	Asymmetric	MACULAR	PUT SPINE HEAD	36832.2	34253.9
AB2	III	AB2-LIII-S2	Asymmetric	MACULAR	UNKNOWN	38297.4	35616.6
AB2	III	AB2-LIII-S2	Asymmetric	MACULAR	SPINY SHAFT	38457.7	35765.6
AB2	III	AB2-LIII-S2	Asymmetric	MACULAR	ASPINY SHAFT	38955.6	36228.7
AB2	III	AB2-LIII-S2	Asymmetric	MACULAR	SPINE HEAD	42787.8	39792.7
AB2	III	AB2-LIII-S2	Asymmetric	MACULAR	SPINE HEAD	45022	41870.4
AB2	III	AB2-LIII-S2	Asymmetric	MACULAR	ASPINY SHAFT	45158.1	41997.1
AB2	III	AB2-LIII-S2	Asymmetric	MACULAR	SPINY SHAFT	46394.5	43146.8
AB2	III	AB2-LIII-S2	Asymmetric	MACULAR	PUT SPINE HEAD	46517.6	43261.4
AB2	III	AB2-LIII-S2	Asymmetric	MACULAR	SPINE HEAD	46600.4	43338.4
AB2	III	AB2-LIII-S2	Asymmetric	MACULAR	SPINY SHAFT	49421	45961.5
AB2	III	AB2-LIII-S2	Asymmetric	MACULAR	SPINE HEAD	49452.5	45990.8
AB2	III	AB2-LIII-S2	Asymmetric	MACULAR	ASPINY SHAFT	49905.8	46412.4
AB2	III	AB2-LIII-S2	Asymmetric	MACULAR	PUT SPINE HEAD	50511.1	46975.4
AB2	III	AB2-LIII-S2	Asymmetric	MACULAR	SPINE HEAD	51625.6	48011.8
AB2	III	AB2-LIII-S2	Asymmetric	MACULAR	ASPINY SHAFT	53291.9	49561.5
AB2	III	AB2-LIII-S2	Asymmetric	MACULAR	SPINY SHAFT	53358.8	49623.7
AB2	III	AB2-LIII-S2	Asymmetric	MACULAR	PUT SPINE HEAD	54164.1	50372.6
AB2	III	AB2-LIII-S2	Asymmetric	MACULAR	UNKNOWN	55982.6	52063.8
AB2	III	AB2-LIII-S2	Asymmetric	MACULAR	SPINE HEAD	59034	54901.6
AB2	III	AB2-LIII-S2	Asymmetric	MACULAR	UNKNOWN	61736.2	57414.6
AB2	III	AB2-LIII-S2	Asymmetric	MACULAR	PUT SPINE HEAD	62926.4	58521.5
AB2	III	AB2-LIII-S2	Asymmetric	MACULAR	SPINE HEAD	64598.1	60076.2
AB2	III	AB2-LIII-S2	Asymmetric	MACULAR	UNKNOWN	66373.3	61727.2
AB2	III	AB2-LIII-S2	Asymmetric	MACULAR	PUT SPINE HEAD	68057.6	63293.6
AB2	III	AB2-LIII-S2	Asymmetric	MACULAR	ASPINY SHAFT	73368.3	68232.5
AB2	III	AB2-LIII-S2	Asymmetric	MACULAR	SPINE HEAD	74014.2	68833.2
AB2	III	AB2-LIII-S2	Asymmetric	PERFORATED	SPINE HEAD	74207.8	69013.2
AB2	III	AB2-LIII-S2	Asymmetric	MACULAR	SPINE HEAD	74836.2	69597.7
AB2	III	AB2-LIII-S2	Asymmetric	MACULAR	PUT SPINE HEAD	76090.9	70764.6
AB2	III	AB2-LIII-S2	Asymmetric	MACULAR	PUT SPINE HEAD	76629.4	71265.3
AB2	III	AB2-LIII-S2	Asymmetric	MACULAR	SPINE HEAD	79705.2	74125.9
AB2	III	AB2-LIII-S2	Asymmetric	MACULAR	ASPINY SHAFT	86970.7	80882.8
AB2	III	AB2-LIII-S2	Asymmetric	MACULAR	PUT SPINE HEAD	87448.4	81327
AB2	III	AB2-LIII-S2	Asymmetric	MACULAR	SPINE HEAD	90936.7	84571.1
AB2	III	AB2-LIII-S2	Asymmetric	MACULAR	SPINE HEAD	91067.9	84693.1
AB2	III	AB2-LIII-S2	Asymmetric	MACULAR	ASPINY SHAFT	93164.9	86643.4
AB2	III	AB2-LIII-S2	Asymmetric	MACULAR	SPINE HEAD	93382	86845.3
AB2	III	AB2-LIII-S2	Asymmetric	MACULAR	ASPINY SHAFT	97997	91137.2
AB2	III	AB2-LIII-S2	Asymmetric	MACULAR	ASPINY SHAFT	102085	94938.6
AB2	III	AB2-LIII-S2	Asymmetric	MACULAR	ASPINY SHAFT	106892	99409.4
AB2	III	AB2-LIII-S2	Symmetric	PERFORATED	ASPINY SHAFT	59532.4	55365.2
AB2	III	AB2-LIII-S2	Asymmetric	MACULAR	SPINE HEAD	110292	102572
AB2	III	AB2-LIII-S2	Asymmetric	MACULAR	ASPINY SHAFT	110564	102825
AB2	III	AB2-LIII-S2	Asymmetric	MACULAR	SPINE HEAD	110870	103109
AB2	III	AB2-LIII-S2	Asymmetric	MACULAR	SPINE HEAD	117714	109474
AB2	III	AB2-LIII-S2	Asymmetric	MACULAR	SPINY SHAFT	118812	110495
AB2	III	AB2-LIII-S2	Asymmetric	MACULAR	PUT SPINE HEAD	121953	113416
AB2	III	AB2-LIII-S2	Asymmetric	MACULAR	SPINY SHAFT	123174	114552
AB2	III	AB2-LIII-S2	Asymmetric	MACULAR	SPINE HEAD	132349	123085
AB2	III	AB2-LIII-S2	Asymmetric	MACULAR	SPINE HEAD	132825	123527
AB2	III	AB2-LIII-S2	Asymmetric	MACULAR	ASPINY SHAFT	133399	124061
AB2	III	AB2-LIII-S2	Asymmetric	PERFORATED	SPINE HEAD	134004	124624
AB2	III	AB2-LIII-S2	Asymmetric	MACULAR	SPINY SHAFT	135873	126362
AB2	III	AB2-LIII-S2	Asymmetric	MACULAR	SPINY SHAFT	147996	137636
AB2	III	AB2-LIII-S2	Asymmetric	MACULAR	ASPINY SHAFT	151348	140753
AB2	III	AB2-LIII-S2	Asymmetric	MACULAR	UNKNOWN	153242	142516
AB2	III	AB2-LIII-S2	Asymmetric	FRAGMENTED	SPINY SHAFT	154215	143420
AB2	III	AB2-LIII-S2	Asymmetric	MACULAR	ASPINY SHAFT	155113	144255
AB2	III	AB2-LIII-S2	Asymmetric	MACULAR	SPINE HEAD	155378	144501
AB2	III	AB2-LIII-S2	Asymmetric	MACULAR	UNKNOWN	159438	148278
AB2	III	AB2-LIII-S2	Symmetric	PERFORATED	SPINY SHAFT	83463.5	77621
AB2	III	AB2-LIII-S2	Asymmetric	MACULAR	UNKNOWN	162287	150927
AB2	III	AB2-LIII-S2	Symmetric	MACULAR	ASPINY SHAFT	86697.1	80628.3
AB2	III	AB2-LIII-S2	Asymmetric	MACULAR	ASPINY SHAFT	171870	159839
AB2	III	AB2-LIII-S2	Asymmetric	MACULAR	SPINE HEAD	172456	160384
AB2	III	AB2-LIII-S2	Asymmetric	MACULAR	ASPINY SHAFT	173523	161376
AB2	III	AB2-LIII-S2	Asymmetric	MACULAR	ASPINY SHAFT	178702	166193
AB2	III	AB2-LIII-S2	Asymmetric	MACULAR	SPINE HEAD	180649	168003
AB2	III	AB2-LIII-S2	Asymmetric	MACULAR	ASPINY SHAFT	180868	168208
AB2	III	AB2-LIII-S2	Asymmetric	MACULAR	SPINE HEAD	182546	169768
AB2	III	AB2-LIII-S2	Asymmetric	MACULAR	SPINY SHAFT	183984	171105
AB2	III	AB2-LIII-S2	Asymmetric	MACULAR	SPINY SHAFT	188060	174896
AB2	III	AB2-LIII-S2	Asymmetric	FRAGMENTED	SPINY SHAFT	189790	176505
AB2	III	AB2-LIII-S2	Asymmetric	MACULAR	SPINY SHAFT	189979	176681
AB2	III	AB2-LIII-S2	Asymmetric	MACULAR	ASPINY SHAFT	191838	178409
AB2	III	AB2-LIII-S2	Symmetric	MACULAR	ASPINY SHAFT	107614	100081
AB2	III	AB2-LIII-S2	Asymmetric	MACULAR	ASPINY SHAFT	194007	180426
AB2	III	AB2-LIII-S2	Symmetric	MACULAR	SPINY SHAFT	110242	102525
AB2	III	AB2-LIII-S2	Asymmetric	MACULAR	SPINY SHAFT	203933	189658
AB2	III	AB2-LIII-S2	Asymmetric	MACULAR	SPINY SHAFT	204379	190072
AB2	III	AB2-LIII-S2	Asymmetric	PERFORATED	ASPINY SHAFT	208500	193905
AB2	III	AB2-LIII-S2	Asymmetric	MACULAR	SPINE HEAD	211956	197119
AB2	III	AB2-LIII-S2	Asymmetric	MACULAR	ASPINY SHAFT	218030	202768
AB2	III	AB2-LIII-S2	Asymmetric	PERFORATED	SPINE HEAD	225938	210122
AB2	III	AB2-LIII-S2	Asymmetric	MACULAR	ASPINY SHAFT	226071	210246
AB2	III	AB2-LIII-S2	Asymmetric	MACULAR	ASPINY SHAFT	229624	213550
AB2	III	AB2-LIII-S2	Symmetric	PERFORATED	ASPINY SHAFT	118747	110435
AB2	III	AB2-LIII-S2	Asymmetric	MACULAR	SPINE HEAD	244781	227646
AB2	III	AB2-LIII-S2	Asymmetric	PERFORATED	SPINE HEAD	267227	248521
AB2	III	AB2-LIII-S2	Asymmetric	PERFORATED	SPINE HEAD	272552	253474
AB2	III	AB2-LIII-S2	Asymmetric	PERFORATED	ASPINY SHAFT	274003	254822
AB2	III	AB2-LIII-S2	Asymmetric	MACULAR	PUT SPINE HEAD	282146	262396
AB2	III	AB2-LIII-S2	Asymmetric	MACULAR	PUT SPINE HEAD	293811	273244
AB2	III	AB2-LIII-S2	Asymmetric	HORSESHOE	SPINE HEAD	338316	314634
AB2	III	AB2-LIII-S2	Asymmetric	FRAGMENTED	SPINE HEAD	384767	357834
AB2	III	AB2-LIII-S2	Asymmetric	PERFORATED	SPINE HEAD	491763	457340
AB2	III	AB2-LIII-S3	Asymmetric	MACULAR	SPINE HEAD	9393.11	8735.6
AB2	III	AB2-LIII-S3	Asymmetric	MACULAR	UNKNOWN	12200.4	11346.4
AB2	III	AB2-LIII-S3	Asymmetric	MACULAR	UNKNOWN	13113.9	12195.9
AB2	III	AB2-LIII-S3	Asymmetric	MACULAR	SPINE HEAD	21771.9	20247.9
AB2	III	AB2-LIII-S3	Asymmetric	MACULAR	ASPINY SHAFT	22793	21197.5
AB2	III	AB2-LIII-S3	Asymmetric	MACULAR	UNKNOWN	24997.5	23247.7
AB2	III	AB2-LIII-S3	Asymmetric	MACULAR	UNKNOWN	25771.8	23967.7
AB2	III	AB2-LIII-S3	Asymmetric	MACULAR	UNKNOWN	29589.4	27518.2
AB2	III	AB2-LIII-S3	Asymmetric	MACULAR	PUT SPINE HEAD	30862	28701.6
AB2	III	AB2-LIII-S3	Asymmetric	MACULAR	UNKNOWN	32013.5	29772.5
AB2	III	AB2-LIII-S3	Asymmetric	MACULAR	UNKNOWN	32300.6	30039.6
AB2	III	AB2-LIII-S3	Asymmetric	MACULAR	SPINE HEAD	34049.2	31665.7
AB2	III	AB2-LIII-S3	Asymmetric	MACULAR	SPINE HEAD	34577.7	32157.3
AB2	III	AB2-LIII-S3	Asymmetric	MACULAR	SPINE HEAD	36306.1	33764.7
AB2	III	AB2-LIII-S3	Symmetric	MACULAR	SPINY SHAFT	30259.8	28141.6
AB2	III	AB2-LIII-S3	Asymmetric	MACULAR	PUT SPINE HEAD	39004.7	36274.4
AB2	III	AB2-LIII-S3	Asymmetric	MACULAR	PUT SPINE HEAD	39018.3	36287
AB2	III	AB2-LIII-S3	Asymmetric	MACULAR	PUT SPINE HEAD	40583.2	37742.4
AB2	III	AB2-LIII-S3	Asymmetric	MACULAR	SPINE HEAD	40639.2	37794.4
AB2	III	AB2-LIII-S3	Asymmetric	MACULAR	PUT SPINE HEAD	40811.9	37955.1
AB2	III	AB2-LIII-S3	Asymmetric	MACULAR	SPINE HEAD	44355	41250.2
AB2	III	AB2-LIII-S3	Asymmetric	MACULAR	PUT SPINE HEAD	44383.7	41276.8
AB2	III	AB2-LIII-S3	Asymmetric	MACULAR	SPINE HEAD	45706.6	42507.2
AB2	III	AB2-LIII-S3	Asymmetric	MACULAR	PUT SPINE HEAD	46793.9	43518.3
AB2	III	AB2-LIII-S3	Asymmetric	MACULAR	SPINE HEAD	47435.9	44115.4
AB2	III	AB2-LIII-S3	Asymmetric	MACULAR	PUT SPINE HEAD	49154.6	45713.8
AB2	III	AB2-LIII-S3	Asymmetric	MACULAR	ASPINY SHAFT	49382.5	45925.7
AB2	III	AB2-LIII-S3	Asymmetric	MACULAR	PUT SPINE HEAD	49469	46006.2
AB2	III	AB2-LIII-S3	Asymmetric	MACULAR	SPINE HEAD	50109.3	46601.6
AB2	III	AB2-LIII-S3	Asymmetric	MACULAR	PUT SPINE HEAD	50803.8	47247.5
AB2	III	AB2-LIII-S3	Asymmetric	MACULAR	SPINE HEAD	50824.2	47266.5
AB2	III	AB2-LIII-S3	Asymmetric	MACULAR	SPINE HEAD	52366.5	48700.9
AB2	III	AB2-LIII-S3	Asymmetric	MACULAR	ASPINY SHAFT	53150.9	49430.4
AB2	III	AB2-LIII-S3	Asymmetric	MACULAR	ASPINY SHAFT	53384	49647.1
AB2	III	AB2-LIII-S3	Asymmetric	MACULAR	SPINE HEAD	53605.9	49853.5
AB2	III	AB2-LIII-S3	Asymmetric	MACULAR	SPINY SHAFT	54950.5	51103.9
AB2	III	AB2-LIII-S3	Asymmetric	MACULAR	PUT SPINE HEAD	55165.3	51303.8
AB2	III	AB2-LIII-S3	Asymmetric	MACULAR	SPINE HEAD	57113.4	53115.5
AB2	III	AB2-LIII-S3	Asymmetric	MACULAR	ASPINY SHAFT	57521.7	53495.2
AB2	III	AB2-LIII-S3	Asymmetric	MACULAR	SPINE HEAD	59327.4	55174.5
AB2	III	AB2-LIII-S3	Asymmetric	MACULAR	ASPINY SHAFT	59398.8	55240.9
AB2	III	AB2-LIII-S3	Asymmetric	MACULAR	SPINE HEAD	59426.8	55266.9
AB2	III	AB2-LIII-S3	Asymmetric	MACULAR	ASPINY SHAFT	62040.7	57697.8
AB2	III	AB2-LIII-S3	Asymmetric	MACULAR	SPINY SHAFT	63267	58838.3
AB2	III	AB2-LIII-S3	Asymmetric	MACULAR	SPINE HEAD	65008.7	60458.1
AB2	III	AB2-LIII-S3	Asymmetric	MACULAR	ASPINY SHAFT	65652	61056.4
AB2	III	AB2-LIII-S3	Asymmetric	MACULAR	SPINE HEAD	65742.1	61140.1
AB2	III	AB2-LIII-S3	Asymmetric	MACULAR	SPINY SHAFT	68746	63933.7
AB2	III	AB2-LIII-S3	Asymmetric	MACULAR	PUT SPINE HEAD	69452.8	64591.1
AB2	III	AB2-LIII-S3	Asymmetric	MACULAR	SPINE HEAD	71893.3	66860.7
AB2	III	AB2-LIII-S3	Asymmetric	MACULAR	PUT SPINE HEAD	72979.8	67871.2
AB2	III	AB2-LIII-S3	Asymmetric	MACULAR	SPINE HEAD	72987.6	67878.5
AB2	III	AB2-LIII-S3	Asymmetric	MACULAR	SPINY SHAFT	73848.7	68679.3
AB2	III	AB2-LIII-S3	Asymmetric	MACULAR	SPINE HEAD	74205.1	69010.7
AB2	III	AB2-LIII-S3	Asymmetric	MACULAR	ASPINY SHAFT	75018	69766.8
AB2	III	AB2-LIII-S3	Asymmetric	MACULAR	UNKNOWN	76072	70747
AB2	III	AB2-LIII-S3	Symmetric	MACULAR	SPINY SHAFT	47487.5	44163.4
AB2	III	AB2-LIII-S3	Asymmetric	MACULAR	SPINY SHAFT	76564.9	71205.4
AB2	III	AB2-LIII-S3	Asymmetric	MACULAR	PUT SPINE HEAD	77081	71685.4
AB2	III	AB2-LIII-S3	Asymmetric	MACULAR	PUT SPINE HEAD	78621.2	73117.7
AB2	III	AB2-LIII-S3	Asymmetric	MACULAR	ASPINY SHAFT	79057.3	73523.3
AB2	III	AB2-LIII-S3	Asymmetric	MACULAR	PUT SPINE HEAD	80288.5	74668.3
AB2	III	AB2-LIII-S3	Asymmetric	MACULAR	SPINY SHAFT	81436.7	75736.1
AB2	III	AB2-LIII-S3	Asymmetric	MACULAR	SPINE HEAD	81844.9	76115.8
AB2	III	AB2-LIII-S3	Asymmetric	MACULAR	SPINY SHAFT	83307.2	77475.7
AB2	III	AB2-LIII-S3	Asymmetric	MACULAR	SPINY SHAFT	83431.4	77591.2
AB2	III	AB2-LIII-S3	Asymmetric	PERFORATED	SPINE HEAD	86443.7	80392.7
AB2	III	AB2-LIII-S3	Asymmetric	MACULAR	PUT SPINE HEAD	89007.3	82776.8
AB2	III	AB2-LIII-S3	Asymmetric	MACULAR	SPINY SHAFT	90427.3	84097.4
AB2	III	AB2-LIII-S3	Asymmetric	MACULAR	SPINY SHAFT	91501.1	85096
AB2	III	AB2-LIII-S3	Asymmetric	MACULAR	SPINE HEAD	91555.6	85146.7
AB2	III	AB2-LIII-S3	Asymmetric	MACULAR	SPINY SHAFT	92586.5	86105.4
AB2	III	AB2-LIII-S3	Asymmetric	MACULAR	PUT SPINE HEAD	93639	87084.3
AB2	III	AB2-LIII-S3	Asymmetric	MACULAR	SPINE HEAD	93763.3	87199.8
AB2	III	AB2-LIII-S3	Asymmetric	MACULAR	SPINE HEAD	93930.8	87355.6
AB2	III	AB2-LIII-S3	Asymmetric	MACULAR	PUT SPINE HEAD	93979.7	87401.1
AB2	III	AB2-LIII-S3	Asymmetric	MACULAR	PUT SPINE HEAD	96501.9	89746.8
AB2	III	AB2-LIII-S3	Asymmetric	MACULAR	PUT SPINE HEAD	99005.1	92074.7
AB2	III	AB2-LIII-S3	Asymmetric	MACULAR	SPINY SHAFT	99328.3	92375.4
AB2	III	AB2-LIII-S3	Asymmetric	MACULAR	SPINE HEAD	101234	94147.3
AB2	III	AB2-LIII-S3	Asymmetric	MACULAR	SPINE HEAD	101998	94857.7
AB2	III	AB2-LIII-S3	Asymmetric	MACULAR	SPINY SHAFT	104068	96783.2
AB2	III	AB2-LIII-S3	Asymmetric	MACULAR	SPINE HEAD	105074	97718.9
AB2	III	AB2-LIII-S3	Asymmetric	MACULAR	SPINE HEAD	109167	101525
AB2	III	AB2-LIII-S3	Asymmetric	MACULAR	PUT SPINE HEAD	111275	103486
AB2	III	AB2-LIII-S3	Asymmetric	MACULAR	ASPINY SHAFT	111279	103490
AB2	III	AB2-LIII-S3	Asymmetric	MACULAR	SPINE HEAD	113856	105886
AB2	III	AB2-LIII-S3	Asymmetric	MACULAR	PUT SPINE HEAD	114110	106123
AB2	III	AB2-LIII-S3	Asymmetric	MACULAR	PUT SPINE HEAD	114782	106748
AB2	III	AB2-LIII-S3	Asymmetric	PERFORATED	SPINY SHAFT	116618	108454
AB2	III	AB2-LIII-S3	Asymmetric	MACULAR	PUT SPINE HEAD	118576	110275
AB2	III	AB2-LIII-S3	Symmetric	PERFORATED	SPINY SHAFT	65238.6	60671.9
AB2	III	AB2-LIII-S3	Asymmetric	MACULAR	SPINY SHAFT	120806	112349
AB2	III	AB2-LIII-S3	Asymmetric	MACULAR	SPINY SHAFT	121020	112549
AB2	III	AB2-LIII-S3	Asymmetric	MACULAR	PUT SPINE HEAD	122627	114043
AB2	III	AB2-LIII-S3	Asymmetric	MACULAR	SPINE HEAD	124401	115692
AB2	III	AB2-LIII-S3	Symmetric	MACULAR	SPINY SHAFT	69158.5	64317.4
AB2	III	AB2-LIII-S3	Asymmetric	MACULAR	ASPINY SHAFT	128750	119738
AB2	III	AB2-LIII-S3	Asymmetric	MACULAR	SPINY SHAFT	129198	120155
AB2	III	AB2-LIII-S3	Asymmetric	MACULAR	SPINY SHAFT	131788	122563
AB2	III	AB2-LIII-S3	Asymmetric	MACULAR	SPINE HEAD	131808	122582
AB2	III	AB2-LIII-S3	Asymmetric	MACULAR	SPINY SHAFT	132268	123010
AB2	III	AB2-LIII-S3	Asymmetric	MACULAR	PUT SPINE HEAD	132434	123164
AB2	III	AB2-LIII-S3	Asymmetric	MACULAR	ASPINY SHAFT	133310	123978
AB2	III	AB2-LIII-S3	Asymmetric	MACULAR	SPINY SHAFT	134819	125381
AB2	III	AB2-LIII-S3	Asymmetric	MACULAR	SPINY SHAFT	135084	125628
AB2	III	AB2-LIII-S3	Asymmetric	PERFORATED	SPINY SHAFT	135556	126067
AB2	III	AB2-LIII-S3	Asymmetric	HORSESHOE	SPINE HEAD	136181	126648
AB2	III	AB2-LIII-S3	Asymmetric	MACULAR	SPINE HEAD	136526	126969
AB2	III	AB2-LIII-S3	Asymmetric	MACULAR	ASPINY SHAFT	137948	128291
AB2	III	AB2-LIII-S3	Asymmetric	PERFORATED	PUT SPINE HEAD	138345	128661
AB2	III	AB2-LIII-S3	Asymmetric	MACULAR	ASPINY SHAFT	138819	129102
AB2	III	AB2-LIII-S3	Asymmetric	MACULAR	SPINE HEAD	145861	135651
AB2	III	AB2-LIII-S3	Asymmetric	MACULAR	SPINY SHAFT	147808	137461
AB2	III	AB2-LIII-S3	Asymmetric	MACULAR	ASPINY SHAFT	148637	138232
AB2	III	AB2-LIII-S3	Asymmetric	MACULAR	SPINE HEAD	150781	140226
AB2	III	AB2-LIII-S3	Asymmetric	PERFORATED	ASPINY SHAFT	154297	143496
AB2	III	AB2-LIII-S3	Asymmetric	MACULAR	SPINY SHAFT	154927	144082
AB2	III	AB2-LIII-S3	Asymmetric	PERFORATED	SPINY SHAFT	155441	144560
AB2	III	AB2-LIII-S3	Asymmetric	MACULAR	SPINE HEAD	164554	153035
AB2	III	AB2-LIII-S3	Symmetric	MACULAR	UNKNOWN	84158.5	78267.4
AB2	III	AB2-LIII-S3	Asymmetric	MACULAR	SPINE HEAD	164735	153203
AB2	III	AB2-LIII-S3	Asymmetric	MACULAR	SPINE HEAD	167941	156185
AB2	III	AB2-LIII-S3	Symmetric	PERFORATED	SPINY SHAFT	88430	82239.9
AB2	III	AB2-LIII-S3	Asymmetric	PERFORATED	PUT SPINE HEAD	169722	157841
AB2	III	AB2-LIII-S3	Asymmetric	MACULAR	SPINY SHAFT	170819	158862
AB2	III	AB2-LIII-S3	Asymmetric	PERFORATED	SPINY SHAFT	173467	161324
AB2	III	AB2-LIII-S3	Asymmetric	MACULAR	SPINE HEAD	175672	163375
AB2	III	AB2-LIII-S3	Asymmetric	MACULAR	SPINY SHAFT	176835	164456
AB2	III	AB2-LIII-S3	Asymmetric	PERFORATED	SPINE HEAD	177096	164699
AB2	III	AB2-LIII-S3	Asymmetric	MACULAR	SPINE HEAD	177375	164959
AB2	III	AB2-LIII-S3	Asymmetric	HORSESHOE	SPINE HEAD	178282	165802
AB2	III	AB2-LIII-S3	Asymmetric	PERFORATED	SPINY SHAFT	183589	170738
AB2	III	AB2-LIII-S3	Asymmetric	MACULAR	SPINY SHAFT	186631	173567
AB2	III	AB2-LIII-S3	Asymmetric	PERFORATED	SPINY SHAFT	187581	174450
AB2	III	AB2-LIII-S3	Asymmetric	MACULAR	SPINY SHAFT	191787	178362
AB2	III	AB2-LIII-S3	Symmetric	MACULAR	ASPINY SHAFT	112898	104995
AB2	III	AB2-LIII-S3	Asymmetric	PERFORATED	PUT SPINE HEAD	205409	191030
AB2	III	AB2-LIII-S3	Asymmetric	PERFORATED	PUT SPINE HEAD	211071	196296
AB2	III	AB2-LIII-S3	Asymmetric	MACULAR	ASPINY SHAFT	212741	197849
AB2	III	AB2-LIII-S3	Asymmetric	PERFORATED	SPINE HEAD	226143	210313
AB2	III	AB2-LIII-S3	Asymmetric	PERFORATED	PUT SPINE HEAD	226581	210720
AB2	III	AB2-LIII-S3	Asymmetric	MACULAR	SPINE HEAD	227211	211306
AB2	III	AB2-LIII-S3	Asymmetric	PERFORATED	PUT SPINE HEAD	232619	216336
AB2	III	AB2-LIII-S3	Symmetric	MACULAR	SPINY SHAFT	133974	124595
AB2	III	AB2-LIII-S3	Asymmetric	FRAGMENTED	PUT SPINE HEAD	270301	251380
AB2	III	AB2-LIII-S3	Asymmetric	MACULAR	SPINE HEAD	271886	252854
AB2	III	AB2-LIII-S3	Asymmetric	FRAGMENTED	SPINE HEAD	281391	261694
AB2	III	AB2-LIII-S3	Asymmetric	MACULAR	SPINY SHAFT	283525	263679
AB2	III	AB2-LIII-S3	Asymmetric	PERFORATED	SPINE HEAD	284463	264551
AB2	III	AB2-LIII-S3	Asymmetric	PERFORATED	SPINY SHAFT	294916	274272
AB2	III	AB2-LIII-S3	Asymmetric	PERFORATED	PUT SPINE HEAD	299025	278093
AB2	III	AB2-LIII-S3	Asymmetric	MACULAR	UNKNOWN	304925	283580
AB2	III	AB2-LIII-S3	Asymmetric	MACULAR	PUT SPINE HEAD	307498	285974
AB2	III	AB2-LIII-S3	Asymmetric	MACULAR	SPINE HEAD	314287	292287
AB2	III	AB2-LIII-S3	Symmetric	MACULAR	SPINY SHAFT	168635	156830
AB2	III	AB2-LIII-S3	Asymmetric	PERFORATED	ASPINY SHAFT	353101	328384
AB2	III	AB2-LIII-S3	Asymmetric	HORSESHOE	ASPINY SHAFT	380040	353437
AB2	III	AB2-LIII-S3	Asymmetric	PERFORATED	ASPINY SHAFT	398874	370953
AB2	III	AB2-LIII-S3	Asymmetric	PERFORATED	SPINE HEAD	465820	433213
AB2	III	AB2-LIII-S3	Asymmetric	HORSESHOE	SPINE HEAD	500434	465404
AB2	III	AB2-LIII-S3	Asymmetric	PERFORATED	SPINE HEAD	532001	494761
AB2	II-IS	AB2-LII-IS-S1	Asymmetric	MACULAR	SPINE HEAD	22858.5	21258.4
AB2	II-IS	AB2-LII-IS-S1	Symmetric	MACULAR	SPINY SHAFT	17123.9	15925.2
AB2	II-IS	AB2-LII-IS-S1	Asymmetric	MACULAR	UNKNOWN	25778.9	23974.3
AB2	II-IS	AB2-LII-IS-S1	Asymmetric	MACULAR	PUT SPINE HEAD	26501	24645.9
AB2	II-IS	AB2-LII-IS-S1	Asymmetric	MACULAR	PUT SPINE HEAD	26744	24871.9
AB2	II-IS	AB2-LII-IS-S1	Asymmetric	MACULAR	PUT SPINE HEAD	30668.4	28521.6
AB2	II-IS	AB2-LII-IS-S1	Asymmetric	MACULAR	SPINE HEAD	38805.3	36088.9
AB2	II-IS	AB2-LII-IS-S1	Asymmetric	MACULAR	PUT SPINE HEAD	45248.2	42080.8
AB2	II-IS	AB2-LII-IS-S1	Asymmetric	MACULAR	SPINE HEAD	46200.7	42966.6
AB2	II-IS	AB2-LII-IS-S1	Asymmetric	MACULAR	ASPINY SHAFT	47896.6	44543.9
AB2	II-IS	AB2-LII-IS-S1	Asymmetric	MACULAR	ASPINY SHAFT	48956.9	45530
AB2	II-IS	AB2-LII-IS-S1	Symmetric	MACULAR	ASPINY SHAFT	39596.2	36824.5
AB2	II-IS	AB2-LII-IS-S1	Asymmetric	MACULAR	SPINE HEAD	57008.3	53017.7
AB2	II-IS	AB2-LII-IS-S1	Asymmetric	MACULAR	SPINY SHAFT	57043.9	53050.9
AB2	II-IS	AB2-LII-IS-S1	Asymmetric	MACULAR	SPINY SHAFT	58867.3	54746.5
AB2	II-IS	AB2-LII-IS-S1	Asymmetric	MACULAR	SPINE HEAD	59938.5	55742.8
AB2	II-IS	AB2-LII-IS-S1	Asymmetric	MACULAR	PUT SPINE HEAD	61117.8	56839.6
AB2	II-IS	AB2-LII-IS-S1	Asymmetric	MACULAR	SPINE HEAD	64124.8	59636.1
AB2	II-IS	AB2-LII-IS-S1	Asymmetric	MACULAR	PUT SPINE HEAD	66433.6	61783.2
AB2	II-IS	AB2-LII-IS-S1	Asymmetric	MACULAR	SPINE HEAD	69360.3	64505.1
AB2	II-IS	AB2-LII-IS-S1	Asymmetric	MACULAR	ASPINY SHAFT	69675.7	64798.4
AB2	II-IS	AB2-LII-IS-S1	Asymmetric	MACULAR	SPINE HEAD	71788.5	66763.3
AB2	II-IS	AB2-LII-IS-S1	Asymmetric	MACULAR	ASPINY SHAFT	72779.8	67685.2
AB2	II-IS	AB2-LII-IS-S1	Asymmetric	MACULAR	PUT SPINE HEAD	73509	68363.4
AB2	II-IS	AB2-LII-IS-S1	Asymmetric	MACULAR	SPINE HEAD	74884.5	69642.5
AB2	II-IS	AB2-LII-IS-S1	Asymmetric	MACULAR	PUT SPINE HEAD	75443.1	70162.1
AB2	II-IS	AB2-LII-IS-S1	Asymmetric	MACULAR	SPINY SHAFT	77919	72464.6
AB2	II-IS	AB2-LII-IS-S1	Asymmetric	MACULAR	PUT SPINE HEAD	81401.9	75703.8
AB2	II-IS	AB2-LII-IS-S1	Asymmetric	MACULAR	SPINE HEAD	81437.8	75737.2
AB2	II-IS	AB2-LII-IS-S1	Asymmetric	MACULAR	ASPINY SHAFT	82897.4	77094.6
AB2	II-IS	AB2-LII-IS-S1	Asymmetric	MACULAR	PUT SPINE HEAD	84346.2	78442
AB2	II-IS	AB2-LII-IS-S1	Asymmetric	MACULAR	ASPINY SHAFT	84398.3	78490.4
AB2	II-IS	AB2-LII-IS-S1	Symmetric	HORSESHOE	SPINY SHAFT	50369.5	46843.6
AB2	II-IS	AB2-LII-IS-S1	Asymmetric	MACULAR	SPINE HEAD	85489.7	79505.4
AB2	II-IS	AB2-LII-IS-S1	Asymmetric	MACULAR	SPINE HEAD	86504.8	80449.5
AB2	II-IS	AB2-LII-IS-S1	Asymmetric	MACULAR	SPINE HEAD	87700.8	81561.8
AB2	II-IS	AB2-LII-IS-S1	Asymmetric	MACULAR	SPINE HEAD	89086.5	82850.5
AB2	II-IS	AB2-LII-IS-S1	Asymmetric	MACULAR	ASPINY SHAFT	93233.9	86707.5
AB2	II-IS	AB2-LII-IS-S1	Symmetric	MACULAR	SPINE HEAD	55204.6	51340.2
AB2	II-IS	AB2-LII-IS-S1	Asymmetric	MACULAR	SPINE HEAD	94882	88240.3
AB2	II-IS	AB2-LII-IS-S1	Asymmetric	MACULAR	SPINY SHAFT	96526.2	89769.4
AB2	II-IS	AB2-LII-IS-S1	Asymmetric	MACULAR	PUT SPINE HEAD	97162.7	90361.3
AB2	II-IS	AB2-LII-IS-S1	Asymmetric	MACULAR	ASPINY SHAFT	98208.7	91334.1
AB2	II-IS	AB2-LII-IS-S1	Asymmetric	MACULAR	SPINY SHAFT	98261.2	91382.9
AB2	II-IS	AB2-LII-IS-S1	Asymmetric	MACULAR	ASPINY SHAFT	99018.5	92087.2
AB2	II-IS	AB2-LII-IS-S1	Asymmetric	MACULAR	ASPINY SHAFT	100299	93277.6
AB2	II-IS	AB2-LII-IS-S1	Asymmetric	MACULAR	SPINY SHAFT	101484	94380.3
AB2	II-IS	AB2-LII-IS-S1	Asymmetric	MACULAR	PUT SPINE HEAD	101712	94591.9
AB2	II-IS	AB2-LII-IS-S1	Asymmetric	MACULAR	SPINE HEAD	103261	96032.8
AB2	II-IS	AB2-LII-IS-S1	Asymmetric	MACULAR	SPINE HEAD	103339	96105.3
AB2	II-IS	AB2-LII-IS-S1	Asymmetric	MACULAR	UNKNOWN	103587	96335.5
AB2	II-IS	AB2-LII-IS-S1	Symmetric	MACULAR	ASPINY SHAFT	58740.3	54628.5
AB2	II-IS	AB2-LII-IS-S1	Asymmetric	MACULAR	PUT SPINE HEAD	105462	98079.8
AB2	II-IS	AB2-LII-IS-S1	Asymmetric	MACULAR	PUT SPINE HEAD	105497	98112.6
AB2	II-IS	AB2-LII-IS-S1	Asymmetric	MACULAR	PUT SPINE HEAD	108995	101366
AB2	II-IS	AB2-LII-IS-S1	Asymmetric	MACULAR	ASPINY SHAFT	110475	102741
AB2	II-IS	AB2-LII-IS-S1	Asymmetric	MACULAR	ASPINY SHAFT	111969	104132
AB2	II-IS	AB2-LII-IS-S1	Asymmetric	MACULAR	SPINY SHAFT	112277	104418
AB2	II-IS	AB2-LII-IS-S1	Asymmetric	MACULAR	ASPINY SHAFT	112346	104482
AB2	II-IS	AB2-LII-IS-S1	Asymmetric	MACULAR	ASPINY SHAFT	113771	105807
AB2	II-IS	AB2-LII-IS-S1	Asymmetric	MACULAR	UNKNOWN	114654	106628
AB2	II-IS	AB2-LII-IS-S1	Asymmetric	MACULAR	SPINY SHAFT	115594	107502
AB2	II-IS	AB2-LII-IS-S1	Asymmetric	MACULAR	SPINE HEAD	116758	108585
AB2	II-IS	AB2-LII-IS-S1	Symmetric	MACULAR	ASPINY SHAFT	61805.8	57479.4
AB2	II-IS	AB2-LII-IS-S1	Asymmetric	MACULAR	ASPINY SHAFT	118870	110549
AB2	II-IS	AB2-LII-IS-S1	Asymmetric	MACULAR	SPINY SHAFT	119649	111273
AB2	II-IS	AB2-LII-IS-S1	Asymmetric	MACULAR	ASPINY SHAFT	120030	111628
AB2	II-IS	AB2-LII-IS-S1	Asymmetric	MACULAR	PUT SPINE HEAD	120623	112179
AB2	II-IS	AB2-LII-IS-S1	Asymmetric	MACULAR	SPINE HEAD	120789	112334
AB2	II-IS	AB2-LII-IS-S1	Asymmetric	MACULAR	ASPINY SHAFT	122665	114078
AB2	II-IS	AB2-LII-IS-S1	Asymmetric	MACULAR	ASPINY SHAFT	122760	114167
AB2	II-IS	AB2-LII-IS-S1	Asymmetric	MACULAR	SPINY SHAFT	124685	115957
AB2	II-IS	AB2-LII-IS-S1	Symmetric	MACULAR	NECK	66768.5	62094.7
AB2	II-IS	AB2-LII-IS-S1	Asymmetric	MACULAR	ASPINY SHAFT	126810	117933
AB2	II-IS	AB2-LII-IS-S1	Asymmetric	MACULAR	ASPINY SHAFT	127298	118387
AB2	II-IS	AB2-LII-IS-S1	Asymmetric	MACULAR	ASPINY SHAFT	128550	119551
AB2	II-IS	AB2-LII-IS-S1	Asymmetric	MACULAR	PUT SPINE HEAD	128593	119592
AB2	II-IS	AB2-LII-IS-S1	Asymmetric	MACULAR	ASPINY SHAFT	131199	122015
AB2	II-IS	AB2-LII-IS-S1	Asymmetric	MACULAR	ASPINY SHAFT	133113	123795
AB2	II-IS	AB2-LII-IS-S1	Symmetric	MACULAR	SPINY SHAFT	72112.7	67064.8
AB2	II-IS	AB2-LII-IS-S1	Symmetric	MACULAR	SPINY SHAFT	72418.8	67349.5
AB2	II-IS	AB2-LII-IS-S1	Asymmetric	MACULAR	PUT SPINE HEAD	138601	128899
AB2	II-IS	AB2-LII-IS-S1	Asymmetric	MACULAR	SPINY SHAFT	138882	129160
AB2	II-IS	AB2-LII-IS-S1	Asymmetric	MACULAR	SPINE HEAD	140644	130799
AB2	II-IS	AB2-LII-IS-S1	Asymmetric	MACULAR	ASPINY SHAFT	141542	131634
AB2	II-IS	AB2-LII-IS-S1	Asymmetric	MACULAR	SPINE HEAD	141598	131686
AB2	II-IS	AB2-LII-IS-S1	Asymmetric	MACULAR	SPINE HEAD	143174	133151
AB2	II-IS	AB2-LII-IS-S1	Asymmetric	MACULAR	SPINE HEAD	143246	133219
AB2	II-IS	AB2-LII-IS-S1	Asymmetric	MACULAR	ASPINY SHAFT	143567	133517
AB2	II-IS	AB2-LII-IS-S1	Asymmetric	MACULAR	SPINE HEAD	143853	133783
AB2	II-IS	AB2-LII-IS-S1	Asymmetric	MACULAR	ASPINY SHAFT	145336	135162
AB2	II-IS	AB2-LII-IS-S1	Asymmetric	MACULAR	SPINE HEAD	146014	135793
AB2	II-IS	AB2-LII-IS-S1	Asymmetric	MACULAR	ASPINY SHAFT	147151	136851
AB2	II-IS	AB2-LII-IS-S1	Asymmetric	MACULAR	PUT SPINE HEAD	148549	138150
AB2	II-IS	AB2-LII-IS-S1	Asymmetric	MACULAR	PUT SPINE HEAD	148648	138243
AB2	II-IS	AB2-LII-IS-S1	Asymmetric	MACULAR	SPINE HEAD	151523	140917
AB2	II-IS	AB2-LII-IS-S1	Asymmetric	MACULAR	ASPINY SHAFT	151706	141086
AB2	II-IS	AB2-LII-IS-S1	Asymmetric	MACULAR	ASPINY SHAFT	151761	141138
AB2	II-IS	AB2-LII-IS-S1	Asymmetric	MACULAR	SPINE HEAD	152707	142017
AB2	II-IS	AB2-LII-IS-S1	Asymmetric	MACULAR	ASPINY SHAFT	153181	142458
AB2	II-IS	AB2-LII-IS-S1	Asymmetric	MACULAR	SPINE HEAD	153201	142477
AB2	II-IS	AB2-LII-IS-S1	Asymmetric	MACULAR	ASPINY SHAFT	155805	144899
AB2	II-IS	AB2-LII-IS-S1	Asymmetric	MACULAR	SPINE HEAD	157336	146323
AB2	II-IS	AB2-LII-IS-S1	Asymmetric	MACULAR	ASPINY SHAFT	157537	146509
AB2	II-IS	AB2-LII-IS-S1	Asymmetric	MACULAR	ASPINY SHAFT	160359	149134
AB2	II-IS	AB2-LII-IS-S1	Asymmetric	MACULAR	ASPINY SHAFT	161981	150642
AB2	II-IS	AB2-LII-IS-S1	Asymmetric	MACULAR	PUT SPINE HEAD	170620	158677
AB2	II-IS	AB2-LII-IS-S1	Asymmetric	MACULAR	SPINE HEAD	170918	158954
AB2	II-IS	AB2-LII-IS-S1	Asymmetric	MACULAR	ASPINY SHAFT	171248	159260
AB2	II-IS	AB2-LII-IS-S1	Asymmetric	MACULAR	SPINY SHAFT	173027	160915
AB2	II-IS	AB2-LII-IS-S1	Symmetric	MACULAR	SPINY SHAFT	91702.1	85282.9
AB2	II-IS	AB2-LII-IS-S1	Asymmetric	MACULAR	SPINE HEAD	174051	161867
AB2	II-IS	AB2-LII-IS-S1	Asymmetric	MACULAR	ASPINY SHAFT	174579	162359
AB2	II-IS	AB2-LII-IS-S1	Asymmetric	MACULAR	ASPINY SHAFT	175403	163125
AB2	II-IS	AB2-LII-IS-S1	Asymmetric	MACULAR	ASPINY SHAFT	175434	163153
AB2	II-IS	AB2-LII-IS-S1	Asymmetric	FRAGMENTED	ASPINY SHAFT	175889	163577
AB2	II-IS	AB2-LII-IS-S1	Asymmetric	MACULAR	ASPINY SHAFT	178399	165911
AB2	II-IS	AB2-LII-IS-S1	Asymmetric	MACULAR	ASPINY SHAFT	179405	166846
AB2	II-IS	AB2-LII-IS-S1	Asymmetric	MACULAR	PUT SPINE HEAD	180520	167884
AB2	II-IS	AB2-LII-IS-S1	Asymmetric	MACULAR	PUT SPINE HEAD	182462	169690
AB2	II-IS	AB2-LII-IS-S1	Asymmetric	MACULAR	SPINE HEAD	183047	170234
AB2	II-IS	AB2-LII-IS-S1	Symmetric	MACULAR	ASPINY SHAFT	105418	98038.3
AB2	II-IS	AB2-LII-IS-S1	Asymmetric	PERFORATED	PUT SPINE HEAD	185606	172613
AB2	II-IS	AB2-LII-IS-S1	Asymmetric	MACULAR	SPINE HEAD	187014	173923
AB2	II-IS	AB2-LII-IS-S1	Asymmetric	MACULAR	SPINY SHAFT	187849	174699
AB2	II-IS	AB2-LII-IS-S1	Asymmetric	MACULAR	SPINE HEAD	190790	177435
AB2	II-IS	AB2-LII-IS-S1	Asymmetric	MACULAR	ASPINY SHAFT	191014	177643
AB2	II-IS	AB2-LII-IS-S1	Asymmetric	PERFORATED	SPINE HEAD	195765	182061
AB2	II-IS	AB2-LII-IS-S1	Asymmetric	MACULAR	SPINE HEAD	205212	190847
AB2	II-IS	AB2-LII-IS-S1	Asymmetric	MACULAR	SPINE HEAD	206743	192271
AB2	II-IS	AB2-LII-IS-S1	Asymmetric	PERFORATED	SPINE HEAD	208124	193556
AB2	II-IS	AB2-LII-IS-S1	Asymmetric	MACULAR	SPINY SHAFT	210184	195471
AB2	II-IS	AB2-LII-IS-S1	Asymmetric	MACULAR	ASPINY SHAFT	213659	198703
AB2	II-IS	AB2-LII-IS-S1	Asymmetric	MACULAR	PUT SPINE HEAD	213731	198770
AB2	II-IS	AB2-LII-IS-S1	Symmetric	MACULAR	SPINY SHAFT	115385	107308
AB2	II-IS	AB2-LII-IS-S1	Asymmetric	MACULAR	ASPINY SHAFT	216957	201770
AB2	II-IS	AB2-LII-IS-S1	Asymmetric	MACULAR	ASPINY SHAFT	219666	204289
AB2	II-IS	AB2-LII-IS-S1	Asymmetric	MACULAR	PUT SPINE HEAD	220806	205350
AB2	II-IS	AB2-LII-IS-S1	Asymmetric	MACULAR	PUT SPINE HEAD	222560	206981
AB2	II-IS	AB2-LII-IS-S1	Asymmetric	MACULAR	ASPINY SHAFT	224563	208844
AB2	II-IS	AB2-LII-IS-S1	Asymmetric	MACULAR	PUT SPINE HEAD	227533	211605
AB2	II-IS	AB2-LII-IS-S1	Asymmetric	PERFORATED	SPINE HEAD	238822	222104
AB2	II-IS	AB2-LII-IS-S1	Asymmetric	MACULAR	SPINE HEAD	255605	237713
AB2	II-IS	AB2-LII-IS-S1	Asymmetric	MACULAR	PUT SPINE HEAD	256266	238328
AB2	II-IS	AB2-LII-IS-S1	Asymmetric	MACULAR	ASPINY SHAFT	259305	241154
AB2	II-IS	AB2-LII-IS-S1	Asymmetric	PERFORATED	SPINE HEAD	273695	254536
AB2	II-IS	AB2-LII-IS-S1	Asymmetric	MACULAR	SPINE HEAD	274408	255199
AB2	II-IS	AB2-LII-IS-S1	Asymmetric	HORSESHOE	SPINE HEAD	286793	266717
AB2	II-IS	AB2-LII-IS-S1	Asymmetric	MACULAR	SPINE HEAD	304570	283250
AB2	II-IS	AB2-LII-IS-S1	Asymmetric	MACULAR	SPINY SHAFT	324910	302167
AB2	II-IS	AB2-LII-IS-S1	Asymmetric	MACULAR	SPINE HEAD	334107	310719
AB2	II-IS	AB2-LII-IS-S1	Asymmetric	PERFORATED	SPINE HEAD	344071	319986
AB2	II-IS	AB2-LII-IS-S1	Asymmetric	PERFORATED	SPINE HEAD	476871	443490
AB2	II-IS	AB2-LII-IS-S1	Asymmetric	PERFORATED	PUT SPINE HEAD	651544	605936
AB2	II-IS	AB2-LII-IS-S2	Asymmetric	MACULAR	SPINE HEAD	13760.2	12797
AB2	II-IS	AB2-LII-IS-S2	Asymmetric	MACULAR	UNKNOWN	21005.2	19534.8
AB2	II-IS	AB2-LII-IS-S2	Asymmetric	MACULAR	UNKNOWN	23041.7	21428.7
AB2	II-IS	AB2-LII-IS-S2	Asymmetric	MACULAR	PUT SPINE HEAD	23664.2	22007.7
AB2	II-IS	AB2-LII-IS-S2	Asymmetric	MACULAR	SPINE HEAD	24696.1	22967.4
AB2	II-IS	AB2-LII-IS-S2	Asymmetric	MACULAR	SPINE HEAD	26161.9	24330.6
AB2	II-IS	AB2-LII-IS-S2	Asymmetric	MACULAR	ASPINY SHAFT	26847.2	24967.9
AB2	II-IS	AB2-LII-IS-S2	Asymmetric	MACULAR	SPINE HEAD	28748.3	26735.9
AB2	II-IS	AB2-LII-IS-S2	Asymmetric	MACULAR	SPINY SHAFT	29361	27305.7
AB2	II-IS	AB2-LII-IS-S2	Asymmetric	MACULAR	PUT SPINE HEAD	30172.7	28060.6
AB2	II-IS	AB2-LII-IS-S2	Asymmetric	MACULAR	PUT SPINE HEAD	32222.2	29966.6
AB2	II-IS	AB2-LII-IS-S2	Asymmetric	MACULAR	UNKNOWN	32677	30389.6
AB2	II-IS	AB2-LII-IS-S2	Asymmetric	MACULAR	SPINE HEAD	37283	34673.2
AB2	II-IS	AB2-LII-IS-S2	Asymmetric	MACULAR	PUT SPINE HEAD	37296.2	34685.4
AB2	II-IS	AB2-LII-IS-S2	Asymmetric	MACULAR	SPINE HEAD	38595	35893.4
AB2	II-IS	AB2-LII-IS-S2	Asymmetric	MACULAR	SPINE HEAD	39165	36423.4
AB2	II-IS	AB2-LII-IS-S2	Asymmetric	MACULAR	UNKNOWN	39469.3	36706.5
AB2	II-IS	AB2-LII-IS-S2	Asymmetric	MACULAR	SPINE HEAD	40903.1	38039.9
AB2	II-IS	AB2-LII-IS-S2	Asymmetric	MACULAR	SPINE HEAD	41304.8	38413.4
AB2	II-IS	AB2-LII-IS-S2	Symmetric	MACULAR	ASPINY SHAFT	34485.4	32071.4
AB2	II-IS	AB2-LII-IS-S2	Asymmetric	MACULAR	ASPINY SHAFT	46230.6	42994.5
AB2	II-IS	AB2-LII-IS-S2	Asymmetric	MACULAR	SPINE HEAD	46980.6	43691.9
AB2	II-IS	AB2-LII-IS-S2	Asymmetric	MACULAR	PUT SPINE HEAD	47499.3	44174.3
AB2	II-IS	AB2-LII-IS-S2	Asymmetric	MACULAR	PUT SPINE HEAD	49281.8	45832
AB2	II-IS	AB2-LII-IS-S2	Symmetric	MACULAR	ASPINY SHAFT	36789.7	34214.4
AB2	II-IS	AB2-LII-IS-S2	Asymmetric	MACULAR	ASPINY SHAFT	51021.2	47449.7
AB2	II-IS	AB2-LII-IS-S2	Asymmetric	MACULAR	SPINE HEAD	51293.6	47703.1
AB2	II-IS	AB2-LII-IS-S2	Asymmetric	MACULAR	UNKNOWN	53598.2	49846.3
AB2	II-IS	AB2-LII-IS-S2	Asymmetric	MACULAR	SPINE HEAD	57455.7	53433.8
AB2	II-IS	AB2-LII-IS-S2	Asymmetric	MACULAR	SPINE HEAD	59232.5	55086.2
AB2	II-IS	AB2-LII-IS-S2	Asymmetric	MACULAR	SPINE HEAD	60459.7	56227.5
AB2	II-IS	AB2-LII-IS-S2	Asymmetric	MACULAR	SPINE HEAD	60564.5	56325
AB2	II-IS	AB2-LII-IS-S2	Asymmetric	MACULAR	ASPINY SHAFT	60884.5	56622.6
AB2	II-IS	AB2-LII-IS-S2	Asymmetric	MACULAR	UNKNOWN	62696.4	58307.7
AB2	II-IS	AB2-LII-IS-S2	Asymmetric	MACULAR	SPINY SHAFT	63580.9	59130.2
AB2	II-IS	AB2-LII-IS-S2	Asymmetric	MACULAR	ASPINY SHAFT	64346	59841.7
AB2	II-IS	AB2-LII-IS-S2	Asymmetric	MACULAR	PUT SPINE HEAD	65520.1	60933.7
AB2	II-IS	AB2-LII-IS-S2	Asymmetric	MACULAR	SPINY SHAFT	67142.5	62442.6
AB2	II-IS	AB2-LII-IS-S2	Asymmetric	MACULAR	SPINE HEAD	67907.8	63154.2
AB2	II-IS	AB2-LII-IS-S2	Asymmetric	MACULAR	SPINE HEAD	68165.7	63394.1
AB2	II-IS	AB2-LII-IS-S2	Asymmetric	MACULAR	PUT SPINE HEAD	68768.5	63954.7
AB2	II-IS	AB2-LII-IS-S2	Asymmetric	MACULAR	SPINE HEAD	69953.7	65057
AB2	II-IS	AB2-LII-IS-S2	Asymmetric	MACULAR	ASPINY SHAFT	71323.8	66331.1
AB2	II-IS	AB2-LII-IS-S2	Asymmetric	MACULAR	SPINE HEAD	72030	66987.9
AB2	II-IS	AB2-LII-IS-S2	Asymmetric	MACULAR	SPINE HEAD	72968.5	67860.7
AB2	II-IS	AB2-LII-IS-S2	Asymmetric	MACULAR	SPINE HEAD	74420.5	69211.1
AB2	II-IS	AB2-LII-IS-S2	Asymmetric	MACULAR	SPINE HEAD	75823	70515.4
AB2	II-IS	AB2-LII-IS-S2	Asymmetric	MACULAR	SPINE HEAD	77253.6	71845.9
AB2	II-IS	AB2-LII-IS-S2	Symmetric	MACULAR	SPINY SHAFT	49431.4	45971.2
AB2	II-IS	AB2-LII-IS-S2	Asymmetric	MACULAR	UNKNOWN	79475.7	73912.4
AB2	II-IS	AB2-LII-IS-S2	Asymmetric	MACULAR	SPINY SHAFT	87209.5	81104.8
AB2	II-IS	AB2-LII-IS-S2	Asymmetric	MACULAR	SPINE HEAD	87600.4	81468.4
AB2	II-IS	AB2-LII-IS-S2	Asymmetric	MACULAR	ASPINY SHAFT	88197.2	82023.4
AB2	II-IS	AB2-LII-IS-S2	Asymmetric	MACULAR	UNKNOWN	88212.1	82037.3
AB2	II-IS	AB2-LII-IS-S2	Asymmetric	MACULAR	SPINE HEAD	89114.2	82876.2
AB2	II-IS	AB2-LII-IS-S2	Asymmetric	MACULAR	PUT SPINE HEAD	91014.5	84643.4
AB2	II-IS	AB2-LII-IS-S2	Asymmetric	MACULAR	ASPINY SHAFT	92028.5	85586.5
AB2	II-IS	AB2-LII-IS-S2	Asymmetric	MACULAR	ASPINY SHAFT	94075.4	87490.1
AB2	II-IS	AB2-LII-IS-S2	Asymmetric	MACULAR	SPINY SHAFT	95212.5	88547.6
AB2	II-IS	AB2-LII-IS-S2	Asymmetric	MACULAR	ASPINY SHAFT	98113.5	91245.6
AB2	II-IS	AB2-LII-IS-S2	Asymmetric	MACULAR	SPINE HEAD	98891	91968.6
AB2	II-IS	AB2-LII-IS-S2	Asymmetric	MACULAR	SPINE HEAD	101426	94326.1
AB2	II-IS	AB2-LII-IS-S2	Asymmetric	MACULAR	ASPINY SHAFT	101798	94672.2
AB2	II-IS	AB2-LII-IS-S2	Symmetric	MACULAR	ASPINY SHAFT	58703.8	54594.6
AB2	II-IS	AB2-LII-IS-S2	Asymmetric	MACULAR	UNKNOWN	104064	96779.8
AB2	II-IS	AB2-LII-IS-S2	Asymmetric	MACULAR	SPINY SHAFT	104721	97390.6
AB2	II-IS	AB2-LII-IS-S2	Asymmetric	MACULAR	SPINY SHAFT	106615	99151.6
AB2	II-IS	AB2-LII-IS-S2	Asymmetric	MACULAR	SPINE HEAD	107367	99851.5
AB2	II-IS	AB2-LII-IS-S2	Asymmetric	MACULAR	SPINE HEAD	107452	99930.6
AB2	II-IS	AB2-LII-IS-S2	Asymmetric	MACULAR	SPINE HEAD	109216	101571
AB2	II-IS	AB2-LII-IS-S2	Asymmetric	MACULAR	SPINE HEAD	109272	101623
AB2	II-IS	AB2-LII-IS-S2	Asymmetric	MACULAR	ASPINY SHAFT	110074	102368
AB2	II-IS	AB2-LII-IS-S2	Asymmetric	MACULAR	ASPINY SHAFT	112937	105032
AB2	II-IS	AB2-LII-IS-S2	Asymmetric	MACULAR	SPINY SHAFT	113774	105810
AB2	II-IS	AB2-LII-IS-S2	Asymmetric	MACULAR	SPINY SHAFT	114015	106034
AB2	II-IS	AB2-LII-IS-S2	Asymmetric	MACULAR	SPINY SHAFT	114335	106331
AB2	II-IS	AB2-LII-IS-S2	Asymmetric	MACULAR	ASPINY SHAFT	114650	106625
AB2	II-IS	AB2-LII-IS-S2	Asymmetric	MACULAR	SPINY SHAFT	114898	106855
AB2	II-IS	AB2-LII-IS-S2	Asymmetric	MACULAR	SPINY SHAFT	114977	106928
AB2	II-IS	AB2-LII-IS-S2	Asymmetric	MACULAR	ASPINY SHAFT	116154	108023
AB2	II-IS	AB2-LII-IS-S2	Asymmetric	PERFORATED	SPINE HEAD	117199	108995
AB2	II-IS	AB2-LII-IS-S2	Asymmetric	MACULAR	SPINE HEAD	119010	110679
AB2	II-IS	AB2-LII-IS-S2	Asymmetric	MACULAR	SPINE HEAD	119565	111196
AB2	II-IS	AB2-LII-IS-S2	Asymmetric	MACULAR	ASPINY SHAFT	120506	112070
AB2	II-IS	AB2-LII-IS-S2	Asymmetric	MACULAR	SPINE HEAD	122248	113691
AB2	II-IS	AB2-LII-IS-S2	Asymmetric	MACULAR	SPINE HEAD	122388	113821
AB2	II-IS	AB2-LII-IS-S2	Asymmetric	MACULAR	ASPINY SHAFT	123148	114528
AB2	II-IS	AB2-LII-IS-S2	Asymmetric	MACULAR	ASPINY SHAFT	124222	115526
AB2	II-IS	AB2-LII-IS-S2	Asymmetric	MACULAR	ASPINY SHAFT	124428	115718
AB2	II-IS	AB2-LII-IS-S2	Asymmetric	MACULAR	PUT SPINE HEAD	125050	116296
AB2	II-IS	AB2-LII-IS-S2	Asymmetric	MACULAR	PUT SPINE HEAD	125390	116612
AB2	II-IS	AB2-LII-IS-S2	Asymmetric	MACULAR	SPINE HEAD	126034	117212
AB2	II-IS	AB2-LII-IS-S2	Asymmetric	MACULAR	SPINY SHAFT	126760	117887
AB2	II-IS	AB2-LII-IS-S2	Symmetric	MACULAR	SPINE HEAD	69335.6	64482.1
AB2	II-IS	AB2-LII-IS-S2	Asymmetric	MACULAR	ASPINY SHAFT	127960	119003
AB2	II-IS	AB2-LII-IS-S2	Asymmetric	MACULAR	SPINE HEAD	128803	119786
AB2	II-IS	AB2-LII-IS-S2	Symmetric	MACULAR	ASPINY SHAFT	71201	66216.9
AB2	II-IS	AB2-LII-IS-S2	Asymmetric	MACULAR	SPINY SHAFT	130171	121059
AB2	II-IS	AB2-LII-IS-S2	Asymmetric	MACULAR	SPINY SHAFT	131135	121956
AB2	II-IS	AB2-LII-IS-S2	Asymmetric	MACULAR	ASPINY SHAFT	134317	124915
AB2	II-IS	AB2-LII-IS-S2	Asymmetric	MACULAR	ASPINY SHAFT	136247	126710
AB2	II-IS	AB2-LII-IS-S2	Asymmetric	MACULAR	SPINY SHAFT	136657	127091
AB2	II-IS	AB2-LII-IS-S2	Asymmetric	MACULAR	PUT SPINE HEAD	140366	130540
AB2	II-IS	AB2-LII-IS-S2	Asymmetric	MACULAR	ASPINY SHAFT	140799	130943
AB2	II-IS	AB2-LII-IS-S2	Asymmetric	MACULAR	ASPINY SHAFT	140935	131070
AB2	II-IS	AB2-LII-IS-S2	Asymmetric	MACULAR	SPINY SHAFT	142607	132625
AB2	II-IS	AB2-LII-IS-S2	Asymmetric	MACULAR	ASPINY SHAFT	144756	134623
AB2	II-IS	AB2-LII-IS-S2	Asymmetric	MACULAR	SPINY SHAFT	145672	135475
AB2	II-IS	AB2-LII-IS-S2	Asymmetric	MACULAR	SPINE HEAD	146404	136156
AB2	II-IS	AB2-LII-IS-S2	Symmetric	MACULAR	SPINY SHAFT	76487.1	71133
AB2	II-IS	AB2-LII-IS-S2	Asymmetric	MACULAR	SPINE HEAD	153298	142567
AB2	II-IS	AB2-LII-IS-S2	Asymmetric	MACULAR	SPINY SHAFT	154980	144131
AB2	II-IS	AB2-LII-IS-S2	Asymmetric	MACULAR	ASPINY SHAFT	156727	145756
AB2	II-IS	AB2-LII-IS-S2	Asymmetric	MACULAR	NECK	158471	147378
AB2	II-IS	AB2-LII-IS-S2	Asymmetric	MACULAR	SPINE HEAD	159431	148271
AB2	II-IS	AB2-LII-IS-S2	Asymmetric	MACULAR	ASPINY SHAFT	161556	150247
AB2	II-IS	AB2-LII-IS-S2	Asymmetric	MACULAR	PUT SPINE HEAD	162040	150697
AB2	II-IS	AB2-LII-IS-S2	Asymmetric	MACULAR	PUT SPINE HEAD	162499	151124
AB2	II-IS	AB2-LII-IS-S2	Asymmetric	MACULAR	SPINY SHAFT	163425	151986
AB2	II-IS	AB2-LII-IS-S2	Asymmetric	MACULAR	SPINY SHAFT	163642	152187
AB2	II-IS	AB2-LII-IS-S2	Asymmetric	MACULAR	ASPINY SHAFT	164235	152739
AB2	II-IS	AB2-LII-IS-S2	Symmetric	MACULAR	ASPINY SHAFT	87304.6	81193.3
AB2	II-IS	AB2-LII-IS-S2	Asymmetric	MACULAR	ASPINY SHAFT	169163	157322
AB2	II-IS	AB2-LII-IS-S2	Asymmetric	MACULAR	ASPINY SHAFT	171011	159040
AB2	II-IS	AB2-LII-IS-S2	Asymmetric	MACULAR	SPINE HEAD	172171	160119
AB2	II-IS	AB2-LII-IS-S2	Asymmetric	MACULAR	SPINE HEAD	174187	161994
AB2	II-IS	AB2-LII-IS-S2	Asymmetric	MACULAR	UNKNOWN	174443	162232
AB2	II-IS	AB2-LII-IS-S2	Asymmetric	MACULAR	PUT SPINE HEAD	176032	163709
AB2	II-IS	AB2-LII-IS-S2	Asymmetric	MACULAR	PUT SPINE HEAD	176275	163936
AB2	II-IS	AB2-LII-IS-S2	Asymmetric	PERFORATED	PUT SPINE HEAD	179506	166941
AB2	II-IS	AB2-LII-IS-S2	Asymmetric	MACULAR	ASPINY SHAFT	190000	176700
AB2	II-IS	AB2-LII-IS-S2	Asymmetric	MACULAR	ASPINY SHAFT	191448	178047
AB2	II-IS	AB2-LII-IS-S2	Symmetric	MACULAR	ASPINY SHAFT	107307	99795.4
AB2	II-IS	AB2-LII-IS-S2	Asymmetric	MACULAR	ASPINY SHAFT	195676	181979
AB2	II-IS	AB2-LII-IS-S2	Asymmetric	MACULAR	SPINE HEAD	197631	183796
AB2	II-IS	AB2-LII-IS-S2	Asymmetric	MACULAR	PUT SPINE HEAD	198383	184496
AB2	II-IS	AB2-LII-IS-S2	Symmetric	MACULAR	SPINY SHAFT	110956	103189
AB2	II-IS	AB2-LII-IS-S2	Symmetric	MACULAR	SPINY SHAFT	111719	103899
AB2	II-IS	AB2-LII-IS-S2	Asymmetric	MACULAR	PUT SPINE HEAD	199224	185278
AB2	II-IS	AB2-LII-IS-S2	Asymmetric	MACULAR	SPINE HEAD	199375	185418
AB2	II-IS	AB2-LII-IS-S2	Asymmetric	MACULAR	SPINE HEAD	212562	197683
AB2	II-IS	AB2-LII-IS-S2	Asymmetric	MACULAR	ASPINY SHAFT	212790	197895
AB2	II-IS	AB2-LII-IS-S2	Asymmetric	MACULAR	ASPINY SHAFT	214891	199849
AB2	II-IS	AB2-LII-IS-S2	Asymmetric	MACULAR	ASPINY SHAFT	215826	200718
AB2	II-IS	AB2-LII-IS-S2	Asymmetric	MACULAR	ASPINY SHAFT	219495	204130
AB2	II-IS	AB2-LII-IS-S2	Asymmetric	MACULAR	ASPINY SHAFT	229787	213702
AB2	II-IS	AB2-LII-IS-S2	Asymmetric	MACULAR	PUT SPINE HEAD	233943	217567
AB2	II-IS	AB2-LII-IS-S2	Asymmetric	MACULAR	PUT SPINE HEAD	236462	219910
AB2	II-IS	AB2-LII-IS-S2	Asymmetric	MACULAR	SPINE HEAD	239088	222352
AB2	II-IS	AB2-LII-IS-S2	Asymmetric	MACULAR	SPINY SHAFT	241538	224630
AB2	II-IS	AB2-LII-IS-S2	Asymmetric	PERFORATED	SPINE HEAD	248198	230824
AB2	II-IS	AB2-LII-IS-S2	Asymmetric	PERFORATED	SPINE HEAD	270185	251272
AB2	II-IS	AB2-LII-IS-S2	Asymmetric	MACULAR	SPINE HEAD	273406	254268
AB2	II-IS	AB2-LII-IS-S2	Asymmetric	MACULAR	PUT SPINE HEAD	274617	255394
AB2	II-IS	AB2-LII-IS-S2	Asymmetric	PERFORATED	SPINE HEAD	284113	264225
AB2	II-IS	AB2-LII-IS-S2	Asymmetric	MACULAR	PUT SPINE HEAD	291009	270638
AB2	II-IS	AB2-LII-IS-S2	Asymmetric	MACULAR	PUT SPINE HEAD	302781	281586
AB2	II-IS	AB2-LII-IS-S2	Asymmetric	PERFORATED	SPINE HEAD	320297	297877
AB2	II-IS	AB2-LII-IS-S2	Asymmetric	PERFORATED	SPINE HEAD	335026	311574
AB2	II-IS	AB2-LII-IS-S2	Asymmetric	PERFORATED	SPINE HEAD	340746	316894
AB2	II-IS	AB2-LII-IS-S2	Asymmetric	PERFORATED	SPINE HEAD	362349	336984
AB2	II-IS	AB2-LII-IS-S2	Asymmetric	MACULAR	SPINE HEAD	407028	378536
AB2	II-IS	AB2-LII-IS-S2	Asymmetric	PERFORATED	SPINE HEAD	446492	415237
AB2	II-IS	AB2-LII-IS-S2	Asymmetric	HORSESHOE	SPINE HEAD	470682	437734
AB2	II-IS	AB2-LII-IS-S2	Symmetric	MACULAR	SPINY SHAFT	242349	225385
AB2	II-IS	AB2-LII-IS-S3	Asymmetric	MACULAR	PUT SPINE HEAD	22621.2	21037.7
AB2	II-IS	AB2-LII-IS-S3	Asymmetric	MACULAR	ASPINY SHAFT	24155.5	22464.6
AB2	II-IS	AB2-LII-IS-S3	Asymmetric	MACULAR	UNKNOWN	28243.7	26266.7
AB2	II-IS	AB2-LII-IS-S3	Asymmetric	MACULAR	SPINE HEAD	29885.6	27793.6
AB2	II-IS	AB2-LII-IS-S3	Asymmetric	MACULAR	UNKNOWN	38723.6	36013
AB2	II-IS	AB2-LII-IS-S3	Asymmetric	MACULAR	SPINE HEAD	40479.6	37646
AB2	II-IS	AB2-LII-IS-S3	Asymmetric	MACULAR	SPINE HEAD	44777.4	41643
AB2	II-IS	AB2-LII-IS-S3	Asymmetric	MACULAR	SPINY SHAFT	44779	41644.5
AB2	II-IS	AB2-LII-IS-S3	Asymmetric	MACULAR	SPINE HEAD	46211.9	42977.1
AB2	II-IS	AB2-LII-IS-S3	Asymmetric	MACULAR	SPINE HEAD	46972.8	43684.7
AB2	II-IS	AB2-LII-IS-S3	Asymmetric	MACULAR	PUT SPINE HEAD	47209.5	43904.8
AB2	II-IS	AB2-LII-IS-S3	Asymmetric	MACULAR	PUT SPINE HEAD	48433.1	45042.8
AB2	II-IS	AB2-LII-IS-S3	Asymmetric	MACULAR	UNKNOWN	49060	45625.8
AB2	II-IS	AB2-LII-IS-S3	Asymmetric	MACULAR	SPINE HEAD	50514.9	46978.9
AB2	II-IS	AB2-LII-IS-S3	Symmetric	MACULAR	SPINY SHAFT	37506	34880.5
AB2	II-IS	AB2-LII-IS-S3	Asymmetric	MACULAR	SPINY SHAFT	52486	48811.9
AB2	II-IS	AB2-LII-IS-S3	Asymmetric	MACULAR	SPINE HEAD	53191.3	49467.9
AB2	II-IS	AB2-LII-IS-S3	Symmetric	MACULAR	SPINY SHAFT	38526.7	35829.8
AB2	II-IS	AB2-LII-IS-S3	Symmetric	MACULAR	SPINE HEAD	38797	36081.2
AB2	II-IS	AB2-LII-IS-S3	Asymmetric	MACULAR	SPINE HEAD	56820	52842.6
AB2	II-IS	AB2-LII-IS-S3	Symmetric	MACULAR	SPINY SHAFT	41068.7	38193.9
AB2	II-IS	AB2-LII-IS-S3	Asymmetric	MACULAR	SPINE HEAD	64084.8	59598.9
AB2	II-IS	AB2-LII-IS-S3	Asymmetric	MACULAR	ASPINY SHAFT	64776.7	60242.4
AB2	II-IS	AB2-LII-IS-S3	Asymmetric	MACULAR	PUT SPINE HEAD	66602.8	61940.6
AB2	II-IS	AB2-LII-IS-S3	Asymmetric	PERFORATED	ASPINY SHAFT	75692.5	70394
AB2	II-IS	AB2-LII-IS-S3	Asymmetric	MACULAR	ASPINY SHAFT	75998.2	70678.3
AB2	II-IS	AB2-LII-IS-S3	Asymmetric	HORSESHOE	SPINE HEAD	76598.2	71236.4
AB2	II-IS	AB2-LII-IS-S3	Asymmetric	MACULAR	SPINE HEAD	77243.2	71836.2
AB2	II-IS	AB2-LII-IS-S3	Asymmetric	MACULAR	PUT SPINE HEAD	78342.7	72858.7
AB2	II-IS	AB2-LII-IS-S3	Asymmetric	MACULAR	SPINE HEAD	79330.2	73777.1
AB2	II-IS	AB2-LII-IS-S3	Asymmetric	MACULAR	PUT SPINE HEAD	82412.7	76643.8
AB2	II-IS	AB2-LII-IS-S3	Asymmetric	MACULAR	ASPINY SHAFT	82737.6	76946
AB2	II-IS	AB2-LII-IS-S3	Asymmetric	MACULAR	SPINE HEAD	82786	76991
AB2	II-IS	AB2-LII-IS-S3	Asymmetric	MACULAR	ASPINY SHAFT	86128.1	80099.1
AB2	II-IS	AB2-LII-IS-S3	Asymmetric	MACULAR	SPINE HEAD	86449.8	80398.3
AB2	II-IS	AB2-LII-IS-S3	Asymmetric	MACULAR	ASPINY SHAFT	86551.5	80492.9
AB2	II-IS	AB2-LII-IS-S3	Asymmetric	MACULAR	PUT SPINE HEAD	88852.8	82633.1
AB2	II-IS	AB2-LII-IS-S3	Asymmetric	MACULAR	ASPINY SHAFT	89751.5	83468.9
AB2	II-IS	AB2-LII-IS-S3	Asymmetric	MACULAR	SPINY SHAFT	93533.8	86986.4
AB2	II-IS	AB2-LII-IS-S3	Asymmetric	MACULAR	SPINY SHAFT	93976.4	87398
AB2	II-IS	AB2-LII-IS-S3	Asymmetric	MACULAR	SPINE HEAD	95920.3	89205.9
AB2	II-IS	AB2-LII-IS-S3	Symmetric	MACULAR	SPINY SHAFT	57596.6	53564.9
AB2	II-IS	AB2-LII-IS-S3	Asymmetric	MACULAR	SPINE HEAD	99877.6	92886.1
AB2	II-IS	AB2-LII-IS-S3	Asymmetric	MACULAR	SPINE HEAD	100848	93788.6
AB2	II-IS	AB2-LII-IS-S3	Asymmetric	MACULAR	SPINE HEAD	100854	93794.6
AB2	II-IS	AB2-LII-IS-S3	Asymmetric	MACULAR	SPINE HEAD	102108	94960.6
AB2	II-IS	AB2-LII-IS-S3	Asymmetric	MACULAR	SPINY SHAFT	102587	95406
AB2	II-IS	AB2-LII-IS-S3	Asymmetric	MACULAR	SPINE HEAD	105465	98082.7
AB2	II-IS	AB2-LII-IS-S3	Asymmetric	MACULAR	SPINE HEAD	107201	99696.9
AB2	II-IS	AB2-LII-IS-S3	Asymmetric	MACULAR	ASPINY SHAFT	110487	102753
AB2	II-IS	AB2-LII-IS-S3	Asymmetric	MACULAR	ASPINY SHAFT	112008	104167
AB2	II-IS	AB2-LII-IS-S3	Asymmetric	MACULAR	SPINY SHAFT	113761	105798
AB2	II-IS	AB2-LII-IS-S3	Asymmetric	MACULAR	SPINY SHAFT	114783	106748
AB2	II-IS	AB2-LII-IS-S3	Asymmetric	MACULAR	ASPINY SHAFT	115708	107608
AB2	II-IS	AB2-LII-IS-S3	Symmetric	FRAGMENTED	SPINY SHAFT	62898.8	58495.9
AB2	II-IS	AB2-LII-IS-S3	Symmetric	MACULAR	ASPINY SHAFT	62992.8	58583.3
AB2	II-IS	AB2-LII-IS-S3	Asymmetric	MACULAR	PUT SPINE HEAD	117310	109098
AB2	II-IS	AB2-LII-IS-S3	Asymmetric	MACULAR	ASPINY SHAFT	118675	110367
AB2	II-IS	AB2-LII-IS-S3	Symmetric	PERFORATED	SPINY SHAFT	65342.8	60768.9
AB2	II-IS	AB2-LII-IS-S3	Asymmetric	MACULAR	ASPINY SHAFT	120966	112498
AB2	II-IS	AB2-LII-IS-S3	Asymmetric	MACULAR	ASPINY SHAFT	122704	114114
AB2	II-IS	AB2-LII-IS-S3	Asymmetric	MACULAR	SPINE HEAD	122782	114187
AB2	II-IS	AB2-LII-IS-S3	Asymmetric	MACULAR	SPINY SHAFT	123180	114557
AB2	II-IS	AB2-LII-IS-S3	Asymmetric	MACULAR	ASPINY SHAFT	124729	115998
AB2	II-IS	AB2-LII-IS-S3	Asymmetric	MACULAR	SPINY SHAFT	126452	117601
AB2	II-IS	AB2-LII-IS-S3	Asymmetric	MACULAR	SPINY SHAFT	127845	118896
AB2	II-IS	AB2-LII-IS-S3	Asymmetric	MACULAR	SPINE HEAD	129521	120455
AB2	II-IS	AB2-LII-IS-S3	Asymmetric	MACULAR	ASPINY SHAFT	130854	121694
AB2	II-IS	AB2-LII-IS-S3	Asymmetric	MACULAR	SPINY SHAFT	131439	122238
AB2	II-IS	AB2-LII-IS-S3	Asymmetric	MACULAR	SPINE HEAD	131567	122357
AB2	II-IS	AB2-LII-IS-S3	Asymmetric	MACULAR	SPINE HEAD	132039	122796
AB2	II-IS	AB2-LII-IS-S3	Asymmetric	MACULAR	UNKNOWN	134926	125481
AB2	II-IS	AB2-LII-IS-S3	Asymmetric	MACULAR	ASPINY SHAFT	135529	126042
AB2	II-IS	AB2-LII-IS-S3	Asymmetric	MACULAR	SPINE HEAD	135675	126178
AB2	II-IS	AB2-LII-IS-S3	Asymmetric	MACULAR	SPINE HEAD	140690	130842
AB2	II-IS	AB2-LII-IS-S3	Asymmetric	MACULAR	SPINY SHAFT	140741	130889
AB2	II-IS	AB2-LII-IS-S3	Asymmetric	MACULAR	UNKNOWN	142138	132188
AB2	II-IS	AB2-LII-IS-S3	Asymmetric	MACULAR	SPINY SHAFT	144155	134064
AB2	II-IS	AB2-LII-IS-S3	Asymmetric	MACULAR	ASPINY SHAFT	144324	134222
AB2	II-IS	AB2-LII-IS-S3	Asymmetric	MACULAR	PUT SPINE HEAD	144706	134577
AB2	II-IS	AB2-LII-IS-S3	Asymmetric	MACULAR	ASPINY SHAFT	145845	135636
AB2	II-IS	AB2-LII-IS-S3	Asymmetric	MACULAR	UNKNOWN	146300	136059
AB2	II-IS	AB2-LII-IS-S3	Asymmetric	MACULAR	SPINE HEAD	148719	138308
AB2	II-IS	AB2-LII-IS-S3	Asymmetric	MACULAR	SPINY SHAFT	149430	138970
AB2	II-IS	AB2-LII-IS-S3	Asymmetric	MACULAR	ASPINY SHAFT	149982	139484
AB2	II-IS	AB2-LII-IS-S3	Asymmetric	MACULAR	ASPINY SHAFT	151192	140608
AB2	II-IS	AB2-LII-IS-S3	Symmetric	MACULAR	ASPINY SHAFT	78040.9	72578.1
AB2	II-IS	AB2-LII-IS-S3	Asymmetric	MACULAR	SPINY SHAFT	155086	144230
AB2	II-IS	AB2-LII-IS-S3	Asymmetric	MACULAR	SPINE HEAD	158226	147150
AB2	II-IS	AB2-LII-IS-S3	Asymmetric	MACULAR	ASPINY SHAFT	158922	147798
AB2	II-IS	AB2-LII-IS-S3	Asymmetric	MACULAR	SPINE HEAD	159234	148088
AB2	II-IS	AB2-LII-IS-S3	Asymmetric	MACULAR	ASPINY SHAFT	160970	149702
AB2	II-IS	AB2-LII-IS-S3	Asymmetric	MACULAR	PUT SPINE HEAD	162690	151302
AB2	II-IS	AB2-LII-IS-S3	Asymmetric	MACULAR	ASPINY SHAFT	162805	151409
AB2	II-IS	AB2-LII-IS-S3	Asymmetric	MACULAR	ASPINY SHAFT	166286	154646
AB2	II-IS	AB2-LII-IS-S3	Asymmetric	MACULAR	SPINY SHAFT	166670	155003
AB2	II-IS	AB2-LII-IS-S3	Asymmetric	MACULAR	ASPINY SHAFT	169976	158078
AB2	II-IS	AB2-LII-IS-S3	Asymmetric	MACULAR	SPINE HEAD	176359	164014
AB2	II-IS	AB2-LII-IS-S3	Asymmetric	PERFORATED	SPINE HEAD	181772	169048
AB2	II-IS	AB2-LII-IS-S3	Asymmetric	MACULAR	PUT SPINE HEAD	185071	172116
AB2	II-IS	AB2-LII-IS-S3	Asymmetric	MACULAR	SPINE HEAD	185103	172145
AB2	II-IS	AB2-LII-IS-S3	Symmetric	MACULAR	ASPINY SHAFT	100585	93544
AB2	II-IS	AB2-LII-IS-S3	Asymmetric	MACULAR	SPINE HEAD	185530	172542
AB2	II-IS	AB2-LII-IS-S3	Asymmetric	MACULAR	ASPINY SHAFT	189082	175846
AB2	II-IS	AB2-LII-IS-S3	Asymmetric	MACULAR	SPINE HEAD	189868	176577
AB2	II-IS	AB2-LII-IS-S3	Asymmetric	MACULAR	SPINE HEAD	191170	177788
AB2	II-IS	AB2-LII-IS-S3	Asymmetric	MACULAR	SPINE HEAD	192095	178648
AB2	II-IS	AB2-LII-IS-S3	Asymmetric	MACULAR	ASPINY SHAFT	194546	180928
AB2	II-IS	AB2-LII-IS-S3	Asymmetric	MACULAR	SPINY SHAFT	194581	180960
AB2	II-IS	AB2-LII-IS-S3	Asymmetric	MACULAR	ASPINY SHAFT	196658	182892
AB2	II-IS	AB2-LII-IS-S3	Asymmetric	MACULAR	SPINE HEAD	201636	187521
AB2	II-IS	AB2-LII-IS-S3	Asymmetric	MACULAR	SPINE HEAD	202090	187944
AB2	II-IS	AB2-LII-IS-S3	Asymmetric	PERFORATED	SPINE HEAD	202455	188283
AB2	II-IS	AB2-LII-IS-S3	Symmetric	PERFORATED	SPINY SHAFT	113301	105370
AB2	II-IS	AB2-LII-IS-S3	Asymmetric	MACULAR	ASPINY SHAFT	207099	192602
AB2	II-IS	AB2-LII-IS-S3	Asymmetric	HORSESHOE	SPINE HEAD	209216	194570
AB2	II-IS	AB2-LII-IS-S3	Asymmetric	MACULAR	SPINY SHAFT	212643	197758
AB2	II-IS	AB2-LII-IS-S3	Asymmetric	MACULAR	ASPINY SHAFT	225122	209363
AB2	II-IS	AB2-LII-IS-S3	Asymmetric	MACULAR	SPINE HEAD	226260	210422
AB2	II-IS	AB2-LII-IS-S3	Asymmetric	MACULAR	PUT SPINE HEAD	227235	211329
AB2	II-IS	AB2-LII-IS-S3	Asymmetric	MACULAR	SPINY SHAFT	229355	213300
AB2	II-IS	AB2-LII-IS-S3	Asymmetric	MACULAR	ASPINY SHAFT	229856	213766
AB2	II-IS	AB2-LII-IS-S3	Asymmetric	PERFORATED	SPINE HEAD	232599	216317
AB2	II-IS	AB2-LII-IS-S3	Asymmetric	MACULAR	ASPINY SHAFT	234640	218215
AB2	II-IS	AB2-LII-IS-S3	Asymmetric	MACULAR	SPINE HEAD	236970	220382
AB2	II-IS	AB2-LII-IS-S3	Asymmetric	MACULAR	SPINY SHAFT	238176	221504
AB2	II-IS	AB2-LII-IS-S3	Symmetric	MACULAR	SPINY SHAFT	128602	119600
AB2	II-IS	AB2-LII-IS-S3	Asymmetric	MACULAR	UNKNOWN	249439	231978
AB2	II-IS	AB2-LII-IS-S3	Asymmetric	MACULAR	SPINY SHAFT	262913	244509
AB2	II-IS	AB2-LII-IS-S3	Asymmetric	MACULAR	PUT SPINE HEAD	276861	257481
AB2	II-IS	AB2-LII-IS-S3	Asymmetric	MACULAR	SPINE HEAD	277369	257953
AB2	II-IS	AB2-LII-IS-S3	Asymmetric	MACULAR	ASPINY SHAFT	285607	265615
AB2	II-IS	AB2-LII-IS-S3	Asymmetric	MACULAR	PUT SPINE HEAD	287597	267465
AB2	II-IS	AB2-LII-IS-S3	Asymmetric	MACULAR	PUT SPINE HEAD	291715	271295
AB2	II-IS	AB2-LII-IS-S3	Asymmetric	PERFORATED	SPINE HEAD	303787	282522
AB2	II-IS	AB2-LII-IS-S3	Asymmetric	MACULAR	SPINE HEAD	315964	293847
AB2	II-IS	AB2-LII-IS-S3	Asymmetric	PERFORATED	PUT SPINE HEAD	322408	299839
AB2	II-IS	AB2-LII-IS-S3	Asymmetric	PERFORATED	SPINE HEAD	325536	302749
AB2	II-IS	AB2-LII-IS-S3	Asymmetric	PERFORATED	SPINE HEAD	327663	304726
AB2	II-IS	AB2-LII-IS-S3	Asymmetric	MACULAR	SPINE HEAD	348130	323760
AB2	II-IS	AB2-LII-IS-S3	Symmetric	PERFORATED	SPINE HEAD	245430	228250
AB2	II-NI	AB2-LII-NI-S1	Asymmetric	MACULAR	PUT SPINE HEAD	21677.6	20160.2
AB2	II-NI	AB2-LII-NI-S1	Asymmetric	MACULAR	SPINY SHAFT	23754.1	22091.3
AB2	II-NI	AB2-LII-NI-S1	Asymmetric	MACULAR	ASPINY SHAFT	24453.2	22741.5
AB2	II-NI	AB2-LII-NI-S1	Asymmetric	MACULAR	ASPINY SHAFT	25211.9	23447
AB2	II-NI	AB2-LII-NI-S1	Asymmetric	MACULAR	UNKNOWN	26049.6	24226.1
AB2	II-NI	AB2-LII-NI-S1	Asymmetric	MACULAR	ASPINY SHAFT	26943.9	25057.8
AB2	II-NI	AB2-LII-NI-S1	Asymmetric	MACULAR	SPINE HEAD	32234.2	29977.8
AB2	II-NI	AB2-LII-NI-S1	Asymmetric	MACULAR	SPINE HEAD	34291.5	31891.1
AB2	II-NI	AB2-LII-NI-S1	Asymmetric	MACULAR	SPINE HEAD	35565.3	33075.8
AB2	II-NI	AB2-LII-NI-S1	Asymmetric	MACULAR	SPINE HEAD	36093.3	33566.7
AB2	II-NI	AB2-LII-NI-S1	Asymmetric	MACULAR	SPINE HEAD	36697.2	34128.4
AB2	II-NI	AB2-LII-NI-S1	Asymmetric	MACULAR	SPINE HEAD	37102.3	34505.2
AB2	II-NI	AB2-LII-NI-S1	Asymmetric	MACULAR	UNKNOWN	40335.1	37511.6
AB2	II-NI	AB2-LII-NI-S1	Asymmetric	MACULAR	ASPINY SHAFT	40615.4	37772.3
AB2	II-NI	AB2-LII-NI-S1	Asymmetric	MACULAR	PUT SPINE HEAD	40810.3	37953.6
AB2	II-NI	AB2-LII-NI-S1	Asymmetric	MACULAR	SPINE HEAD	41750.1	38827.6
AB2	II-NI	AB2-LII-NI-S1	Asymmetric	MACULAR	SPINE HEAD	43145	40124.8
AB2	II-NI	AB2-LII-NI-S1	Asymmetric	MACULAR	UNKNOWN	45496.4	42311.7
AB2	II-NI	AB2-LII-NI-S1	Asymmetric	MACULAR	ASPINY SHAFT	50901.9	47338.7
AB2	II-NI	AB2-LII-NI-S1	Asymmetric	MACULAR	PUT SPINE HEAD	50915.5	47351.4
AB2	II-NI	AB2-LII-NI-S1	Asymmetric	MACULAR	SPINE HEAD	51455.7	47853.8
AB2	II-NI	AB2-LII-NI-S1	Asymmetric	MACULAR	PUT SPINE HEAD	52139.5	48489.7
AB2	II-NI	AB2-LII-NI-S1	Asymmetric	MACULAR	PUT SPINE HEAD	53933.3	50158
AB2	II-NI	AB2-LII-NI-S1	Asymmetric	MACULAR	PUT SPINE HEAD	54046	50262.8
AB2	II-NI	AB2-LII-NI-S1	Asymmetric	MACULAR	SPINE HEAD	54329.1	50526.1
AB2	II-NI	AB2-LII-NI-S1	Asymmetric	MACULAR	SPINE HEAD	55366.7	51491.1
AB2	II-NI	AB2-LII-NI-S1	Asymmetric	MACULAR	PUT SPINE HEAD	56144.7	52214.6
AB2	II-NI	AB2-LII-NI-S1	Asymmetric	MACULAR	SPINE HEAD	57166.4	53164.8
AB2	II-NI	AB2-LII-NI-S1	Asymmetric	MACULAR	SPINE HEAD	58162.5	54091.1
AB2	II-NI	AB2-LII-NI-S1	Asymmetric	MACULAR	PUT SPINE HEAD	60681.5	56433.8
AB2	II-NI	AB2-LII-NI-S1	Asymmetric	MACULAR	SPINE HEAD	61265.5	56977
AB2	II-NI	AB2-LII-NI-S1	Asymmetric	MACULAR	SPINY SHAFT	63530.1	59083
AB2	II-NI	AB2-LII-NI-S1	Asymmetric	MACULAR	UNKNOWN	63572.2	59122.1
AB2	II-NI	AB2-LII-NI-S1	Asymmetric	MACULAR	SPINY SHAFT	66075.7	61450.4
AB2	II-NI	AB2-LII-NI-S1	Asymmetric	MACULAR	PUT SPINE HEAD	66075.9	61450.6
AB2	II-NI	AB2-LII-NI-S1	Asymmetric	MACULAR	SPINY SHAFT	66241.9	61605
AB2	II-NI	AB2-LII-NI-S1	Asymmetric	MACULAR	SPINE HEAD	67264.1	62555.6
AB2	II-NI	AB2-LII-NI-S1	Asymmetric	MACULAR	PUT SPINE HEAD	67355.1	62640.2
AB2	II-NI	AB2-LII-NI-S1	Symmetric	PERFORATED	SPINY SHAFT	45204	42039.7
AB2	II-NI	AB2-LII-NI-S1	Asymmetric	MACULAR	SPINE HEAD	69381.5	64524.8
AB2	II-NI	AB2-LII-NI-S1	Asymmetric	MACULAR	SPINY SHAFT	70820.1	65862.7
AB2	II-NI	AB2-LII-NI-S1	Asymmetric	MACULAR	PUT SPINE HEAD	71223.3	66237.6
AB2	II-NI	AB2-LII-NI-S1	Asymmetric	MACULAR	ASPINY SHAFT	71232.2	66245.9
AB2	II-NI	AB2-LII-NI-S1	Asymmetric	MACULAR	SPINE HEAD	71455.7	66453.8
AB2	II-NI	AB2-LII-NI-S1	Symmetric	MACULAR	ASPINY SHAFT	46414.6	43165.6
AB2	II-NI	AB2-LII-NI-S1	Symmetric	MACULAR	SPINY SHAFT	46762.8	43489.4
AB2	II-NI	AB2-LII-NI-S1	Asymmetric	MACULAR	SPINE HEAD	74371.1	69165.2
AB2	II-NI	AB2-LII-NI-S1	Asymmetric	MACULAR	SPINE HEAD	74401.6	69193.5
AB2	II-NI	AB2-LII-NI-S1	Asymmetric	MACULAR	PUT SPINE HEAD	74988.7	69739.5
AB2	II-NI	AB2-LII-NI-S1	Asymmetric	MACULAR	SPINY SHAFT	76246.5	70909.2
AB2	II-NI	AB2-LII-NI-S1	Asymmetric	MACULAR	NECK	76356	71011.1
AB2	II-NI	AB2-LII-NI-S1	Asymmetric	MACULAR	SPINE HEAD	78193.5	72720
AB2	II-NI	AB2-LII-NI-S1	Asymmetric	MACULAR	SPINE HEAD	78621.2	73117.7
AB2	II-NI	AB2-LII-NI-S1	Asymmetric	MACULAR	ASPINY SHAFT	79468.7	73905.9
AB2	II-NI	AB2-LII-NI-S1	Asymmetric	MACULAR	PUT SPINE HEAD	82388.6	76621.4
AB2	II-NI	AB2-LII-NI-S1	Asymmetric	MACULAR	ASPINY SHAFT	83500.2	77655.2
AB2	II-NI	AB2-LII-NI-S1	Asymmetric	MACULAR	PUT SPINE HEAD	83706.3	77846.9
AB2	II-NI	AB2-LII-NI-S1	Asymmetric	MACULAR	SPINE HEAD	84896.4	78953.7
AB2	II-NI	AB2-LII-NI-S1	Symmetric	MACULAR	ASPINY SHAFT	50666.9	47120.2
AB2	II-NI	AB2-LII-NI-S1	Asymmetric	MACULAR	SPINY SHAFT	85142	79182.1
AB2	II-NI	AB2-LII-NI-S1	Asymmetric	MACULAR	PUT SPINE HEAD	86578.5	80518
AB2	II-NI	AB2-LII-NI-S1	Asymmetric	MACULAR	SPINE HEAD	87163	81061.6
AB2	II-NI	AB2-LII-NI-S1	Symmetric	MACULAR	ASPINY SHAFT	53385.8	49648.8
AB2	II-NI	AB2-LII-NI-S1	Asymmetric	MACULAR	PUT SPINE HEAD	90121.2	83812.7
AB2	II-NI	AB2-LII-NI-S1	Asymmetric	MACULAR	PUT SPINE HEAD	90491.7	84157.3
AB2	II-NI	AB2-LII-NI-S1	Asymmetric	MACULAR	ASPINY SHAFT	93431	86890.9
AB2	II-NI	AB2-LII-NI-S1	Asymmetric	MACULAR	ASPINY SHAFT	96333.9	89590.5
AB2	II-NI	AB2-LII-NI-S1	Asymmetric	MACULAR	SPINE HEAD	96469.1	89716.2
AB2	II-NI	AB2-LII-NI-S1	Asymmetric	MACULAR	SPINE HEAD	97144	90343.9
AB2	II-NI	AB2-LII-NI-S1	Asymmetric	MACULAR	SPINE HEAD	97292.8	90482.3
AB2	II-NI	AB2-LII-NI-S1	Asymmetric	MACULAR	SPINY SHAFT	98778.8	91864.3
AB2	II-NI	AB2-LII-NI-S1	Asymmetric	MACULAR	PUT SPINE HEAD	99346.3	92392.1
AB2	II-NI	AB2-LII-NI-S1	Asymmetric	MACULAR	ASPINY SHAFT	100138	93128.6
AB2	II-NI	AB2-LII-NI-S1	Asymmetric	MACULAR	SPINY SHAFT	102615	95431.7
AB2	II-NI	AB2-LII-NI-S1	Asymmetric	MACULAR	SPINY SHAFT	103292	96061.5
AB2	II-NI	AB2-LII-NI-S1	Asymmetric	MACULAR	SPINE HEAD	103751	96488.6
AB2	II-NI	AB2-LII-NI-S1	Asymmetric	MACULAR	SPINE HEAD	103879	96607.3
AB2	II-NI	AB2-LII-NI-S1	Asymmetric	MACULAR	SPINY SHAFT	104877	97535.7
AB2	II-NI	AB2-LII-NI-S1	Asymmetric	MACULAR	ASPINY SHAFT	105525	98138.7
AB2	II-NI	AB2-LII-NI-S1	Asymmetric	MACULAR	SPINY SHAFT	105852	98442
AB2	II-NI	AB2-LII-NI-S1	Asymmetric	MACULAR	SPINE HEAD	107002	99511.8
AB2	II-NI	AB2-LII-NI-S1	Symmetric	MACULAR	ASPINY SHAFT	59488.2	55324
AB2	II-NI	AB2-LII-NI-S1	Asymmetric	MACULAR	ASPINY SHAFT	107787	100242
AB2	II-NI	AB2-LII-NI-S1	Asymmetric	MACULAR	ASPINY SHAFT	107789	100244
AB2	II-NI	AB2-LII-NI-S1	Asymmetric	MACULAR	PUT SPINE HEAD	108013	100452
AB2	II-NI	AB2-LII-NI-S1	Asymmetric	MACULAR	ASPINY SHAFT	108504	100909
AB2	II-NI	AB2-LII-NI-S1	Asymmetric	MACULAR	ASPINY SHAFT	110919	103155
AB2	II-NI	AB2-LII-NI-S1	Asymmetric	MACULAR	PUT SPINE HEAD	110920	103155
AB2	II-NI	AB2-LII-NI-S1	Asymmetric	MACULAR	ASPINY SHAFT	111100	103323
AB2	II-NI	AB2-LII-NI-S1	Asymmetric	MACULAR	SPINY SHAFT	112894	104991
AB2	II-NI	AB2-LII-NI-S1	Asymmetric	MACULAR	SPINY SHAFT	114216	106221
AB2	II-NI	AB2-LII-NI-S1	Asymmetric	MACULAR	SPINE HEAD	115786	107681
AB2	II-NI	AB2-LII-NI-S1	Asymmetric	MACULAR	SPINE HEAD	116092	107965
AB2	II-NI	AB2-LII-NI-S1	Asymmetric	MACULAR	ASPINY SHAFT	116841	108662
AB2	II-NI	AB2-LII-NI-S1	Asymmetric	MACULAR	PUT SPINE HEAD	118061	109797
AB2	II-NI	AB2-LII-NI-S1	Asymmetric	MACULAR	SPINY SHAFT	118744	110432
AB2	II-NI	AB2-LII-NI-S1	Asymmetric	MACULAR	SPINE HEAD	120731	112279
AB2	II-NI	AB2-LII-NI-S1	Asymmetric	MACULAR	SPINE HEAD	123640	114986
AB2	II-NI	AB2-LII-NI-S1	Asymmetric	MACULAR	ASPINY SHAFT	124240	115543
AB2	II-NI	AB2-LII-NI-S1	Asymmetric	MACULAR	ASPINY SHAFT	125534	116746
AB2	II-NI	AB2-LII-NI-S1	Asymmetric	MACULAR	ASPINY SHAFT	125701	116902
AB2	II-NI	AB2-LII-NI-S1	Asymmetric	MACULAR	SPINE HEAD	126195	117361
AB2	II-NI	AB2-LII-NI-S1	Asymmetric	MACULAR	SPINY SHAFT	127387	118470
AB2	II-NI	AB2-LII-NI-S1	Asymmetric	MACULAR	PUT SPINE HEAD	127522	118596
AB2	II-NI	AB2-LII-NI-S1	Asymmetric	MACULAR	SPINE HEAD	128567	119567
AB2	II-NI	AB2-LII-NI-S1	Symmetric	MACULAR	ASPINY SHAFT	70322.4	65399.8
AB2	II-NI	AB2-LII-NI-S1	Asymmetric	MACULAR	SPINY SHAFT	131649	122434
AB2	II-NI	AB2-LII-NI-S1	Asymmetric	MACULAR	ASPINY SHAFT	133887	124515
AB2	II-NI	AB2-LII-NI-S1	Asymmetric	MACULAR	ASPINY SHAFT	134554	125136
AB2	II-NI	AB2-LII-NI-S1	Asymmetric	MACULAR	ASPINY SHAFT	135181	125718
AB2	II-NI	AB2-LII-NI-S1	Asymmetric	MACULAR	SPINY SHAFT	137216	127611
AB2	II-NI	AB2-LII-NI-S1	Asymmetric	MACULAR	SPINE HEAD	138505	128809
AB2	II-NI	AB2-LII-NI-S1	Asymmetric	MACULAR	ASPINY SHAFT	138650	128945
AB2	II-NI	AB2-LII-NI-S1	Asymmetric	MACULAR	SPINY SHAFT	140098	130291
AB2	II-NI	AB2-LII-NI-S1	Asymmetric	MACULAR	PUT SPINE HEAD	141539	131632
AB2	II-NI	AB2-LII-NI-S1	Symmetric	MACULAR	SPINY SHAFT	73672.1	68515
AB2	II-NI	AB2-LII-NI-S1	Asymmetric	MACULAR	SPINY SHAFT	144652	134526
AB2	II-NI	AB2-LII-NI-S1	Asymmetric	MACULAR	PUT SPINE HEAD	147810	137464
AB2	II-NI	AB2-LII-NI-S1	Asymmetric	MACULAR	ASPINY SHAFT	147977	137619
AB2	II-NI	AB2-LII-NI-S1	Asymmetric	PERFORATED	PUT SPINE HEAD	148465	138072
AB2	II-NI	AB2-LII-NI-S1	Asymmetric	PERFORATED	SPINE HEAD	149829	139341
AB2	II-NI	AB2-LII-NI-S1	Asymmetric	MACULAR	SPINE HEAD	154323	143520
AB2	II-NI	AB2-LII-NI-S1	Asymmetric	MACULAR	SPINE HEAD	154639	143814
AB2	II-NI	AB2-LII-NI-S1	Asymmetric	MACULAR	SPINE HEAD	154981	144132
AB2	II-NI	AB2-LII-NI-S1	Asymmetric	MACULAR	SPINE HEAD	155117	144259
AB2	II-NI	AB2-LII-NI-S1	Asymmetric	PERFORATED	SPINE HEAD	156695	145726
AB2	II-NI	AB2-LII-NI-S1	Asymmetric	MACULAR	ASPINY SHAFT	160257	149039
AB2	II-NI	AB2-LII-NI-S1	Asymmetric	MACULAR	SPINE HEAD	163219	151793
AB2	II-NI	AB2-LII-NI-S1	Symmetric	MACULAR	SPINY SHAFT	83736.7	77875.1
AB2	II-NI	AB2-LII-NI-S1	Asymmetric	HORSESHOE	PUT SPINE HEAD	164898	153355
AB2	II-NI	AB2-LII-NI-S1	Asymmetric	MACULAR	SPINY SHAFT	165045	153492
AB2	II-NI	AB2-LII-NI-S1	Asymmetric	MACULAR	ASPINY SHAFT	168134	156365
AB2	II-NI	AB2-LII-NI-S1	Symmetric	HORSESHOE	SPINY SHAFT	89612	83339.2
AB2	II-NI	AB2-LII-NI-S1	Asymmetric	MACULAR	SPINY SHAFT	172640	160555
AB2	II-NI	AB2-LII-NI-S1	Asymmetric	MACULAR	SPINY SHAFT	173651	161496
AB2	II-NI	AB2-LII-NI-S1	Asymmetric	MACULAR	SPINE HEAD	174388	162181
AB2	II-NI	AB2-LII-NI-S1	Asymmetric	MACULAR	SPINY SHAFT	176880	164498
AB2	II-NI	AB2-LII-NI-S1	Asymmetric	MACULAR	SPINY SHAFT	177606	165173
AB2	II-NI	AB2-LII-NI-S1	Asymmetric	MACULAR	SPINY SHAFT	177644	165209
AB2	II-NI	AB2-LII-NI-S1	Asymmetric	MACULAR	SPINY SHAFT	183144	170324
AB2	II-NI	AB2-LII-NI-S1	Asymmetric	MACULAR	ASPINY SHAFT	185439	172458
AB2	II-NI	AB2-LII-NI-S1	Asymmetric	MACULAR	ASPINY SHAFT	186256	173218
AB2	II-NI	AB2-LII-NI-S1	Asymmetric	MACULAR	ASPINY SHAFT	192969	179461
AB2	II-NI	AB2-LII-NI-S1	Asymmetric	MACULAR	SPINE HEAD	198068	184204
AB2	II-NI	AB2-LII-NI-S1	Asymmetric	MACULAR	ASPINY SHAFT	199669	185692
AB2	II-NI	AB2-LII-NI-S1	Asymmetric	PERFORATED	SPINE HEAD	203055	188841
AB2	II-NI	AB2-LII-NI-S1	Asymmetric	MACULAR	PUT SPINE HEAD	204546	190228
AB2	II-NI	AB2-LII-NI-S1	Asymmetric	MACULAR	SPINE HEAD	209544	194876
AB2	II-NI	AB2-LII-NI-S1	Asymmetric	MACULAR	SPINE HEAD	215399	200322
AB2	II-NI	AB2-LII-NI-S1	Asymmetric	PERFORATED	SPINE HEAD	217852	202603
AB2	II-NI	AB2-LII-NI-S1	Asymmetric	MACULAR	SPINE HEAD	248612	231209
AB2	II-NI	AB2-LII-NI-S1	Asymmetric	PERFORATED	SPINE HEAD	254946	237100
AB2	II-NI	AB2-LII-NI-S1	Asymmetric	MACULAR	SPINE HEAD	259801	241615
AB2	II-NI	AB2-LII-NI-S1	Asymmetric	FRAGMENTED	SPINE HEAD	273833	254665
AB2	II-NI	AB2-LII-NI-S1	Asymmetric	MACULAR	SPINE HEAD	274809	255573
AB2	II-NI	AB2-LII-NI-S1	Asymmetric	MACULAR	SPINE HEAD	275328	256055
AB2	II-NI	AB2-LII-NI-S1	Symmetric	HORSESHOE	SPINY SHAFT	144661	134535
AB2	II-NI	AB2-LII-NI-S1	Asymmetric	PERFORATED	SPINE HEAD	286581	266521
AB2	II-NI	AB2-LII-NI-S1	Asymmetric	MACULAR	SPINE HEAD	292212	271757
AB2	II-NI	AB2-LII-NI-S1	Asymmetric	MACULAR	SPINE HEAD	293653	273097
AB2	II-NI	AB2-LII-NI-S1	Asymmetric	PERFORATED	SPINE HEAD	316447	294295
AB2	II-NI	AB2-LII-NI-S1	Asymmetric	MACULAR	ASPINY SHAFT	319110	296773
AB2	II-NI	AB2-LII-NI-S1	Asymmetric	PERFORATED	SPINE HEAD	327189	304286
AB2	II-NI	AB2-LII-NI-S1	Asymmetric	HORSESHOE	PUT SPINE HEAD	338354	314669
AB2	II-NI	AB2-LII-NI-S1	Asymmetric	PERFORATED	SPINE HEAD	375328	349055
AB2	II-NI	AB2-LII-NI-S2	Asymmetric	MACULAR	UNKNOWN	37469.8	34847
AB2	II-NI	AB2-LII-NI-S2	Asymmetric	MACULAR	SPINE HEAD	37944	35287.9
AB2	II-NI	AB2-LII-NI-S2	Asymmetric	MACULAR	ASPINY SHAFT	38176.6	35504.3
AB2	II-NI	AB2-LII-NI-S2	Asymmetric	MACULAR	ASPINY SHAFT	38694.2	35985.6
AB2	II-NI	AB2-LII-NI-S2	Asymmetric	MACULAR	SPINE HEAD	39422.3	36662.8
AB2	II-NI	AB2-LII-NI-S2	Asymmetric	MACULAR	SPINE HEAD	42142.8	39192.8
AB2	II-NI	AB2-LII-NI-S2	Asymmetric	MACULAR	ASPINY SHAFT	44914.8	41770.7
AB2	II-NI	AB2-LII-NI-S2	Asymmetric	MACULAR	ASPINY SHAFT	45519.9	42333.5
AB2	II-NI	AB2-LII-NI-S2	Asymmetric	MACULAR	SPINE HEAD	46626.9	43363
AB2	II-NI	AB2-LII-NI-S2	Asymmetric	MACULAR	SPINY SHAFT	48513.3	45117.4
AB2	II-NI	AB2-LII-NI-S2	Asymmetric	MACULAR	SPINE HEAD	49029.2	45597.1
AB2	II-NI	AB2-LII-NI-S2	Asymmetric	MACULAR	ASPINY SHAFT	52060.6	48416.4
AB2	II-NI	AB2-LII-NI-S2	Asymmetric	MACULAR	ASPINY SHAFT	52411.7	48742.9
AB2	II-NI	AB2-LII-NI-S2	Asymmetric	MACULAR	ASPINY SHAFT	52988.3	49279.1
AB2	II-NI	AB2-LII-NI-S2	Asymmetric	MACULAR	PUT SPINE HEAD	55796.6	51890.8
AB2	II-NI	AB2-LII-NI-S2	Asymmetric	MACULAR	ASPINY SHAFT	58127	54058.2
AB2	II-NI	AB2-LII-NI-S2	Asymmetric	MACULAR	SPINE HEAD	59052.8	54919.1
AB2	II-NI	AB2-LII-NI-S2	Asymmetric	MACULAR	ASPINY SHAFT	59054.2	54920.4
AB2	II-NI	AB2-LII-NI-S2	Asymmetric	MACULAR	SPINE HEAD	59084.5	54948.6
AB2	II-NI	AB2-LII-NI-S2	Asymmetric	MACULAR	PUT SPINE HEAD	59645	55469.8
AB2	II-NI	AB2-LII-NI-S2	Asymmetric	MACULAR	ASPINY SHAFT	64714.1	60184.1
AB2	II-NI	AB2-LII-NI-S2	Asymmetric	MACULAR	SPINE HEAD	66403.3	61755.1
AB2	II-NI	AB2-LII-NI-S2	Asymmetric	MACULAR	PUT SPINE HEAD	67188.4	62485.2
AB2	II-NI	AB2-LII-NI-S2	Asymmetric	MACULAR	ASPINY SHAFT	67994.5	63234.9
AB2	II-NI	AB2-LII-NI-S2	Asymmetric	MACULAR	PUT SPINE HEAD	68189	63415.8
AB2	II-NI	AB2-LII-NI-S2	Asymmetric	MACULAR	SPINY SHAFT	68643.5	63838.5
AB2	II-NI	AB2-LII-NI-S2	Asymmetric	MACULAR	PUT SPINE HEAD	69140.6	64300.8
AB2	II-NI	AB2-LII-NI-S2	Asymmetric	MACULAR	ASPINY SHAFT	71667.8	66651.1
AB2	II-NI	AB2-LII-NI-S2	Asymmetric	MACULAR	ASPINY SHAFT	72605.3	67522.9
AB2	II-NI	AB2-LII-NI-S2	Asymmetric	MACULAR	PUT SPINE HEAD	74185.8	68992.8
AB2	II-NI	AB2-LII-NI-S2	Asymmetric	MACULAR	PUT SPINE HEAD	75008.4	69757.8
AB2	II-NI	AB2-LII-NI-S2	Asymmetric	MACULAR	PUT SPINE HEAD	76716.4	71346.2
AB2	II-NI	AB2-LII-NI-S2	Asymmetric	MACULAR	SPINE HEAD	79373.4	73817.2
AB2	II-NI	AB2-LII-NI-S2	Asymmetric	MACULAR	SPINE HEAD	83123.7	77305.1
AB2	II-NI	AB2-LII-NI-S2	Asymmetric	MACULAR	ASPINY SHAFT	84536.1	78618.5
AB2	II-NI	AB2-LII-NI-S2	Asymmetric	MACULAR	SPINE HEAD	88968	82740.2
AB2	II-NI	AB2-LII-NI-S2	Asymmetric	MACULAR	PUT SPINE HEAD	89490.6	83226.2
AB2	II-NI	AB2-LII-NI-S2	Asymmetric	MACULAR	ASPINY SHAFT	91191.9	84808.5
AB2	II-NI	AB2-LII-NI-S2	Asymmetric	MACULAR	PUT SPINE HEAD	93299.8	86768.8
AB2	II-NI	AB2-LII-NI-S2	Asymmetric	MACULAR	SPINE HEAD	94391.6	87784.2
AB2	II-NI	AB2-LII-NI-S2	Asymmetric	MACULAR	ASPINY SHAFT	94572.7	87952.6
AB2	II-NI	AB2-LII-NI-S2	Asymmetric	MACULAR	ASPINY SHAFT	94789.5	88154.3
AB2	II-NI	AB2-LII-NI-S2	Asymmetric	MACULAR	ASPINY SHAFT	95097.1	88440.3
AB2	II-NI	AB2-LII-NI-S2	Asymmetric	PERFORATED	SPINE HEAD	95233	88566.7
AB2	II-NI	AB2-LII-NI-S2	Asymmetric	MACULAR	SPINE HEAD	95742.8	89040.8
AB2	II-NI	AB2-LII-NI-S2	Asymmetric	MACULAR	SPINE HEAD	97257.3	90449.2
AB2	II-NI	AB2-LII-NI-S2	Asymmetric	MACULAR	SPINE HEAD	97587.9	90756.7
AB2	II-NI	AB2-LII-NI-S2	Asymmetric	MACULAR	SPINY SHAFT	97755.2	90912.3
AB2	II-NI	AB2-LII-NI-S2	Asymmetric	MACULAR	PUT SPINE HEAD	99205.2	92260.9
AB2	II-NI	AB2-LII-NI-S2	Asymmetric	MACULAR	PUT SPINE HEAD	99716.6	92736.4
AB2	II-NI	AB2-LII-NI-S2	Asymmetric	MACULAR	ASPINY SHAFT	99769	92785.2
AB2	II-NI	AB2-LII-NI-S2	Asymmetric	MACULAR	ASPINY SHAFT	102594	95412
AB2	II-NI	AB2-LII-NI-S2	Asymmetric	MACULAR	PUT SPINE HEAD	104574	97253.4
AB2	II-NI	AB2-LII-NI-S2	Asymmetric	MACULAR	PUT SPINE HEAD	104824	97486.3
AB2	II-NI	AB2-LII-NI-S2	Asymmetric	MACULAR	ASPINY SHAFT	105263	97894.4
AB2	II-NI	AB2-LII-NI-S2	Asymmetric	MACULAR	SPINE HEAD	106479	99025.5
AB2	II-NI	AB2-LII-NI-S2	Asymmetric	MACULAR	SPINE HEAD	107569	100039
AB2	II-NI	AB2-LII-NI-S2	Asymmetric	MACULAR	ASPINY SHAFT	108280	100700
AB2	II-NI	AB2-LII-NI-S2	Asymmetric	MACULAR	PUT SPINE HEAD	114562	106543
AB2	II-NI	AB2-LII-NI-S2	Asymmetric	MACULAR	SPINY SHAFT	115209	107144
AB2	II-NI	AB2-LII-NI-S2	Asymmetric	MACULAR	PUT SPINE HEAD	116034	107912
AB2	II-NI	AB2-LII-NI-S2	Asymmetric	MACULAR	ASPINY SHAFT	120860	112400
AB2	II-NI	AB2-LII-NI-S2	Symmetric	MACULAR	ASPINY SHAFT	65416.4	60837.2
AB2	II-NI	AB2-LII-NI-S2	Symmetric	MACULAR	ASPINY SHAFT	65546	60957.8
AB2	II-NI	AB2-LII-NI-S2	Asymmetric	MACULAR	SPINE HEAD	124904	116161
AB2	II-NI	AB2-LII-NI-S2	Asymmetric	MACULAR	SPINE HEAD	125052	116298
AB2	II-NI	AB2-LII-NI-S2	Asymmetric	MACULAR	ASPINY SHAFT	125558	116769
AB2	II-NI	AB2-LII-NI-S2	Asymmetric	MACULAR	SPINY SHAFT	125757	116954
AB2	II-NI	AB2-LII-NI-S2	Asymmetric	MACULAR	PUT SPINE HEAD	126011	117190
AB2	II-NI	AB2-LII-NI-S2	Asymmetric	MACULAR	ASPINY SHAFT	127594	118662
AB2	II-NI	AB2-LII-NI-S2	Asymmetric	MACULAR	SPINE HEAD	131922	122687
AB2	II-NI	AB2-LII-NI-S2	Asymmetric	MACULAR	ASPINY SHAFT	133244	123917
AB2	II-NI	AB2-LII-NI-S2	Asymmetric	MACULAR	PUT SPINE HEAD	136870	127289
AB2	II-NI	AB2-LII-NI-S2	Asymmetric	PERFORATED	SPINE HEAD	137487	127863
AB2	II-NI	AB2-LII-NI-S2	Asymmetric	MACULAR	SPINE HEAD	138048	128385
AB2	II-NI	AB2-LII-NI-S2	Asymmetric	MACULAR	SPINY SHAFT	143001	132991
AB2	II-NI	AB2-LII-NI-S2	Asymmetric	MACULAR	SPINE HEAD	150123	139615
AB2	II-NI	AB2-LII-NI-S2	Asymmetric	MACULAR	SPINY SHAFT	152682	141994
AB2	II-NI	AB2-LII-NI-S2	Asymmetric	MACULAR	SPINE HEAD	153104	142387
AB2	II-NI	AB2-LII-NI-S2	Asymmetric	PERFORATED	PUT SPINE HEAD	153299	142568
AB2	II-NI	AB2-LII-NI-S2	Asymmetric	MACULAR	ASPINY SHAFT	153402	142664
AB2	II-NI	AB2-LII-NI-S2	Asymmetric	MACULAR	SPINE HEAD	155680	144782
AB2	II-NI	AB2-LII-NI-S2	Asymmetric	MACULAR	ASPINY SHAFT	156918	145934
AB2	II-NI	AB2-LII-NI-S2	Asymmetric	MACULAR	SPINE HEAD	157831	146782
AB2	II-NI	AB2-LII-NI-S2	Asymmetric	MACULAR	SPINY SHAFT	158420	147330
AB2	II-NI	AB2-LII-NI-S2	Asymmetric	MACULAR	SPINE HEAD	158978	147850
AB2	II-NI	AB2-LII-NI-S2	Asymmetric	MACULAR	PUT SPINE HEAD	159351	148196
AB2	II-NI	AB2-LII-NI-S2	Asymmetric	MACULAR	SPINY SHAFT	162730	151338
AB2	II-NI	AB2-LII-NI-S2	Asymmetric	PERFORATED	PUT SPINE HEAD	163372	151936
AB2	II-NI	AB2-LII-NI-S2	Asymmetric	MACULAR	PUT SPINE HEAD	164222	152726
AB2	II-NI	AB2-LII-NI-S2	Asymmetric	MACULAR	PUT SPINE HEAD	166779	155104
AB2	II-NI	AB2-LII-NI-S2	Asymmetric	MACULAR	SPINY SHAFT	168697	156888
AB2	II-NI	AB2-LII-NI-S2	Asymmetric	MACULAR	ASPINY SHAFT	169578	157707
AB2	II-NI	AB2-LII-NI-S2	Asymmetric	MACULAR	PUT SPINE HEAD	170853	158893
AB2	II-NI	AB2-LII-NI-S2	Asymmetric	MACULAR	SPINE HEAD	173877	161706
AB2	II-NI	AB2-LII-NI-S2	Asymmetric	MACULAR	SPINE HEAD	174199	162005
AB2	II-NI	AB2-LII-NI-S2	Asymmetric	MACULAR	SPINY SHAFT	176017	163696
AB2	II-NI	AB2-LII-NI-S2	Asymmetric	MACULAR	SPINE HEAD	176616	164253
AB2	II-NI	AB2-LII-NI-S2	Asymmetric	MACULAR	SPINY SHAFT	179765	167181
AB2	II-NI	AB2-LII-NI-S2	Asymmetric	MACULAR	SPINY SHAFT	184934	171989
AB2	II-NI	AB2-LII-NI-S2	Asymmetric	MACULAR	ASPINY SHAFT	186046	173023
AB2	II-NI	AB2-LII-NI-S2	Asymmetric	PERFORATED	ASPINY SHAFT	186976	173887
AB2	II-NI	AB2-LII-NI-S2	Asymmetric	MACULAR	ASPINY SHAFT	187940	174784
AB2	II-NI	AB2-LII-NI-S2	Asymmetric	MACULAR	PUT SPINE HEAD	187992	174833
AB2	II-NI	AB2-LII-NI-S2	Asymmetric	MACULAR	PUT SPINE HEAD	188311	175129
AB2	II-NI	AB2-LII-NI-S2	Asymmetric	MACULAR	SPINE HEAD	190825	177467
AB2	II-NI	AB2-LII-NI-S2	Asymmetric	MACULAR	SPINE HEAD	191489	178085
AB2	II-NI	AB2-LII-NI-S2	Asymmetric	MACULAR	SPINY SHAFT	192314	178852
AB2	II-NI	AB2-LII-NI-S2	Asymmetric	MACULAR	SPINE HEAD	199158	185217
AB2	II-NI	AB2-LII-NI-S2	Asymmetric	MACULAR	SPINE HEAD	202243	188086
AB2	II-NI	AB2-LII-NI-S2	Asymmetric	MACULAR	ASPINY SHAFT	202848	188648
AB2	II-NI	AB2-LII-NI-S2	Asymmetric	MACULAR	ASPINY SHAFT	213153	198233
AB2	II-NI	AB2-LII-NI-S2	Symmetric	MACULAR	SPINY SHAFT	115825	107717
AB2	II-NI	AB2-LII-NI-S2	Asymmetric	MACULAR	SPINE HEAD	213873	198902
AB2	II-NI	AB2-LII-NI-S2	Asymmetric	MACULAR	SPINE HEAD	215293	200222
AB2	II-NI	AB2-LII-NI-S2	Asymmetric	PERFORATED	PUT SPINE HEAD	217303	202092
AB2	II-NI	AB2-LII-NI-S2	Asymmetric	MACULAR	SPINE HEAD	224885	209143
AB2	II-NI	AB2-LII-NI-S2	Asymmetric	MACULAR	ASPINY SHAFT	240848	223988
AB2	II-NI	AB2-LII-NI-S2	Asymmetric	MACULAR	SPINE HEAD	252877	235176
AB2	II-NI	AB2-LII-NI-S2	Asymmetric	MACULAR	SPINE HEAD	259247	241100
AB2	II-NI	AB2-LII-NI-S2	Asymmetric	MACULAR	SPINY SHAFT	259272	241123
AB2	II-NI	AB2-LII-NI-S2	Asymmetric	MACULAR	PUT SPINE HEAD	265667	247070
AB2	II-NI	AB2-LII-NI-S2	Asymmetric	MACULAR	SPINY SHAFT	286687	266619
AB2	II-NI	AB2-LII-NI-S2	Asymmetric	PERFORATED	SPINE HEAD	295746	275044
AB2	II-NI	AB2-LII-NI-S2	Symmetric	MACULAR	SPINE HEAD	158933	147808
AB2	II-NI	AB2-LII-NI-S2	Asymmetric	MACULAR	SPINY SHAFT	312749	290856
AB2	II-NI	AB2-LII-NI-S2	Asymmetric	MACULAR	SPINE HEAD	342756	318763
AB2	II-NI	AB2-LII-NI-S2	Asymmetric	HORSESHOE	SPINE HEAD	344564	320445
AB2	II-NI	AB2-LII-NI-S2	Asymmetric	PERFORATED	SPINE HEAD	374169	347977
AB2	II-NI	AB2-LII-NI-S2	Asymmetric	HORSESHOE	SPINE HEAD	419783	390398
AB2	II-NI	AB2-LII-NI-S2	Asymmetric	PERFORATED	SPINE HEAD	423463	393820
AB2	II-NI	AB2-LII-NI-S3	Asymmetric	MACULAR	SPINE HEAD	6398.59	5950.69
AB2	II-NI	AB2-LII-NI-S3	Asymmetric	MACULAR	SPINY SHAFT	11976.2	11137.8
AB2	II-NI	AB2-LII-NI-S3	Asymmetric	MACULAR	ASPINY SHAFT	14572.7	13552.6
AB2	II-NI	AB2-LII-NI-S3	Asymmetric	MACULAR	SPINE HEAD	14846.1	13806.9
AB2	II-NI	AB2-LII-NI-S3	Asymmetric	MACULAR	SPINE HEAD	14933.7	13888.3
AB2	II-NI	AB2-LII-NI-S3	Asymmetric	MACULAR	SPINE HEAD	19137.5	17797.9
AB2	II-NI	AB2-LII-NI-S3	Asymmetric	MACULAR	ASPINY SHAFT	19318.4	17966.1
AB2	II-NI	AB2-LII-NI-S3	Asymmetric	MACULAR	PUT SPINE HEAD	20278.5	18859
AB2	II-NI	AB2-LII-NI-S3	Asymmetric	MACULAR	SPINE HEAD	20364.7	18939.2
AB2	II-NI	AB2-LII-NI-S3	Asymmetric	MACULAR	PUT SPINE HEAD	20669.5	19222.6
AB2	II-NI	AB2-LII-NI-S3	Symmetric	MACULAR	SPINY SHAFT	13999.8	13019.8
AB2	II-NI	AB2-LII-NI-S3	Asymmetric	MACULAR	SPINE HEAD	22619.8	21036.4
AB2	II-NI	AB2-LII-NI-S3	Asymmetric	MACULAR	PUT SPINE HEAD	26100.4	24273.4
AB2	II-NI	AB2-LII-NI-S3	Asymmetric	MACULAR	ASPINY SHAFT	26105.6	24278.2
AB2	II-NI	AB2-LII-NI-S3	Asymmetric	MACULAR	PUT SPINE HEAD	27060.6	25166.3
AB2	II-NI	AB2-LII-NI-S3	Asymmetric	MACULAR	SPINE HEAD	30270.9	28151.9
AB2	II-NI	AB2-LII-NI-S3	Asymmetric	MACULAR	SPINE HEAD	31322.2	29129.7
AB2	II-NI	AB2-LII-NI-S3	Asymmetric	MACULAR	SPINE HEAD	32043.8	29800.8
AB2	II-NI	AB2-LII-NI-S3	Asymmetric	MACULAR	SPINE HEAD	32155.6	29904.7
AB2	II-NI	AB2-LII-NI-S3	Asymmetric	MACULAR	SPINE HEAD	33412.2	31073.3
AB2	II-NI	AB2-LII-NI-S3	Asymmetric	MACULAR	PUT SPINE HEAD	33542.5	31194.5
AB2	II-NI	AB2-LII-NI-S3	Asymmetric	MACULAR	ASPINY SHAFT	33917.9	31543.6
AB2	II-NI	AB2-LII-NI-S3	Asymmetric	MACULAR	ASPINY SHAFT	37885.3	35233.3
AB2	II-NI	AB2-LII-NI-S3	Asymmetric	MACULAR	SPINE HEAD	42261.2	39302.9
AB2	II-NI	AB2-LII-NI-S3	Asymmetric	MACULAR	ASPINY SHAFT	42280.1	39320.5
AB2	II-NI	AB2-LII-NI-S3	Asymmetric	MACULAR	PUT SPINE HEAD	43863.5	40793.1
AB2	II-NI	AB2-LII-NI-S3	Asymmetric	MACULAR	PUT SPINE HEAD	44051.5	40967.9
AB2	II-NI	AB2-LII-NI-S3	Asymmetric	MACULAR	SPINE HEAD	46191.5	42958.1
AB2	II-NI	AB2-LII-NI-S3	Asymmetric	MACULAR	SPINE HEAD	49386.1	45929.1
AB2	II-NI	AB2-LII-NI-S3	Asymmetric	MACULAR	PUT SPINE HEAD	49421	45961.5
AB2	II-NI	AB2-LII-NI-S3	Asymmetric	MACULAR	SPINE HEAD	50934.8	47369.3
AB2	II-NI	AB2-LII-NI-S3	Asymmetric	MACULAR	PUT SPINE HEAD	51809.7	48183
AB2	II-NI	AB2-LII-NI-S3	Asymmetric	MACULAR	ASPINY SHAFT	52172.4	48520.3
AB2	II-NI	AB2-LII-NI-S3	Symmetric	MACULAR	SPINY SHAFT	36991.3	34401.9
AB2	II-NI	AB2-LII-NI-S3	Symmetric	FRAGMENTED	SPINY SHAFT	38486.7	35792.6
AB2	II-NI	AB2-LII-NI-S3	Asymmetric	MACULAR	UNKNOWN	53298.5	49567.6
AB2	II-NI	AB2-LII-NI-S3	Asymmetric	MACULAR	SPINE HEAD	56514.1	52558.1
AB2	II-NI	AB2-LII-NI-S3	Asymmetric	MACULAR	SPINE HEAD	57723.7	53683.1
AB2	II-NI	AB2-LII-NI-S3	Asymmetric	MACULAR	SPINE HEAD	58023.7	53962
AB2	II-NI	AB2-LII-NI-S3	Symmetric	MACULAR	ASPINY SHAFT	42491	39516.7
AB2	II-NI	AB2-LII-NI-S3	Asymmetric	MACULAR	SPINE HEAD	61454	57152.2
AB2	II-NI	AB2-LII-NI-S3	Asymmetric	MACULAR	ASPINY SHAFT	61546.7	57238.4
AB2	II-NI	AB2-LII-NI-S3	Asymmetric	MACULAR	SPINE HEAD	62532.2	58155
AB2	II-NI	AB2-LII-NI-S3	Asymmetric	MACULAR	SPINE HEAD	63854.2	59384.4
AB2	II-NI	AB2-LII-NI-S3	Asymmetric	MACULAR	PUT SPINE HEAD	65141	60581.1
AB2	II-NI	AB2-LII-NI-S3	Asymmetric	MACULAR	PUT SPINE HEAD	66643.1	61978.1
AB2	II-NI	AB2-LII-NI-S3	Asymmetric	MACULAR	PUT SPINE HEAD	67291.6	62581.2
AB2	II-NI	AB2-LII-NI-S3	Asymmetric	MACULAR	SPINY SHAFT	67857.7	63107.7
AB2	II-NI	AB2-LII-NI-S3	Symmetric	MACULAR	ASPINY SHAFT	43913.9	40840
AB2	II-NI	AB2-LII-NI-S3	Asymmetric	MACULAR	SPINY SHAFT	68338.5	63554.8
AB2	II-NI	AB2-LII-NI-S3	Asymmetric	MACULAR	ASPINY SHAFT	69385.8	64528.8
AB2	II-NI	AB2-LII-NI-S3	Asymmetric	MACULAR	ASPINY SHAFT	71706.8	66687.3
AB2	II-NI	AB2-LII-NI-S3	Asymmetric	MACULAR	ASPINY SHAFT	71861.7	66831.3
AB2	II-NI	AB2-LII-NI-S3	Symmetric	MACULAR	ASPINY SHAFT	46511.9	43256
AB2	II-NI	AB2-LII-NI-S3	Asymmetric	MACULAR	ASPINY SHAFT	75742.5	70440.5
AB2	II-NI	AB2-LII-NI-S3	Asymmetric	MACULAR	ASPINY SHAFT	79165.5	73623.9
AB2	II-NI	AB2-LII-NI-S3	Asymmetric	MACULAR	SPINY SHAFT	79528.2	73961.2
AB2	II-NI	AB2-LII-NI-S3	Asymmetric	MACULAR	SPINE HEAD	80857.3	75197.3
AB2	II-NI	AB2-LII-NI-S3	Asymmetric	MACULAR	SPINE HEAD	83042.2	77229.2
AB2	II-NI	AB2-LII-NI-S3	Asymmetric	MACULAR	PUT SPINE HEAD	83538.7	77691
AB2	II-NI	AB2-LII-NI-S3	Asymmetric	MACULAR	SPINY SHAFT	85632.3	79638
AB2	II-NI	AB2-LII-NI-S3	Asymmetric	MACULAR	SPINE HEAD	86972.2	80884.2
AB2	II-NI	AB2-LII-NI-S3	Asymmetric	MACULAR	ASPINY SHAFT	87223.7	81118.1
AB2	II-NI	AB2-LII-NI-S3	Asymmetric	MACULAR	SPINE HEAD	87968.7	81810.9
AB2	II-NI	AB2-LII-NI-S3	Asymmetric	MACULAR	SPINY SHAFT	89611.7	83338.9
AB2	II-NI	AB2-LII-NI-S3	Asymmetric	MACULAR	ASPINY SHAFT	91602.8	85190.6
AB2	II-NI	AB2-LII-NI-S3	Asymmetric	MACULAR	SPINY SHAFT	93789.6	87224.3
AB2	II-NI	AB2-LII-NI-S3	Asymmetric	MACULAR	PUT SPINE HEAD	94689.4	88061.2
AB2	II-NI	AB2-LII-NI-S3	Symmetric	MACULAR	ASPINY SHAFT	54979.5	51131
AB2	II-NI	AB2-LII-NI-S3	Asymmetric	MACULAR	PUT SPINE HEAD	95298.9	88628
AB2	II-NI	AB2-LII-NI-S3	Asymmetric	PERFORATED	ASPINY SHAFT	95524.6	88837.9
AB2	II-NI	AB2-LII-NI-S3	Asymmetric	MACULAR	SPINE HEAD	96814	90037
AB2	II-NI	AB2-LII-NI-S3	Asymmetric	MACULAR	SPINE HEAD	98038.3	91175.6
AB2	II-NI	AB2-LII-NI-S3	Asymmetric	MACULAR	SPINY SHAFT	98074.6	91209.3
AB2	II-NI	AB2-LII-NI-S3	Asymmetric	MACULAR	ASPINY SHAFT	100018	93016.8
AB2	II-NI	AB2-LII-NI-S3	Asymmetric	MACULAR	PUT SPINE HEAD	102688	95500.3
AB2	II-NI	AB2-LII-NI-S3	Asymmetric	PERFORATED	SPINY SHAFT	103814	96547.4
AB2	II-NI	AB2-LII-NI-S3	Asymmetric	MACULAR	PUT SPINE HEAD	108124	100556
AB2	II-NI	AB2-LII-NI-S3	Asymmetric	MACULAR	UNKNOWN	108332	100749
AB2	II-NI	AB2-LII-NI-S3	Asymmetric	MACULAR	SPINY SHAFT	108377	100791
AB2	II-NI	AB2-LII-NI-S3	Asymmetric	MACULAR	SPINY SHAFT	110161	102449
AB2	II-NI	AB2-LII-NI-S3	Asymmetric	MACULAR	PUT SPINE HEAD	111005	103234
AB2	II-NI	AB2-LII-NI-S3	Asymmetric	MACULAR	SPINE HEAD	111791	103966
AB2	II-NI	AB2-LII-NI-S3	Symmetric	MACULAR	SPINY SHAFT	61507	57201.6
AB2	II-NI	AB2-LII-NI-S3	Asymmetric	MACULAR	SPINY SHAFT	114911	106867
AB2	II-NI	AB2-LII-NI-S3	Asymmetric	MACULAR	PUT SPINE HEAD	115305	107234
AB2	II-NI	AB2-LII-NI-S3	Asymmetric	MACULAR	SPINE HEAD	115391	107314
AB2	II-NI	AB2-LII-NI-S3	Asymmetric	MACULAR	PUT SPINE HEAD	119145	110805
AB2	II-NI	AB2-LII-NI-S3	Asymmetric	PERFORATED	PUT SPINE HEAD	121950	113413
AB2	II-NI	AB2-LII-NI-S3	Asymmetric	MACULAR	PUT SPINE HEAD	122937	114332
AB2	II-NI	AB2-LII-NI-S3	Asymmetric	MACULAR	SPINE HEAD	122956	114349
AB2	II-NI	AB2-LII-NI-S3	Asymmetric	MACULAR	ASPINY SHAFT	123956	115279
AB2	II-NI	AB2-LII-NI-S3	Asymmetric	MACULAR	SPINE HEAD	128247	119270
AB2	II-NI	AB2-LII-NI-S3	Asymmetric	MACULAR	SPINY SHAFT	129285	120235
AB2	II-NI	AB2-LII-NI-S3	Asymmetric	PERFORATED	PUT SPINE HEAD	129437	120377
AB2	II-NI	AB2-LII-NI-S3	Asymmetric	MACULAR	PUT SPINE HEAD	130740	121588
AB2	II-NI	AB2-LII-NI-S3	Asymmetric	PERFORATED	ASPINY SHAFT	131032	121860
AB2	II-NI	AB2-LII-NI-S3	Asymmetric	MACULAR	ASPINY SHAFT	132005	122764
AB2	II-NI	AB2-LII-NI-S3	Asymmetric	MACULAR	SPINY SHAFT	133281	123952
AB2	II-NI	AB2-LII-NI-S3	Asymmetric	MACULAR	ASPINY SHAFT	133324	123991
AB2	II-NI	AB2-LII-NI-S3	Asymmetric	MACULAR	SPINY SHAFT	133393	124055
AB2	II-NI	AB2-LII-NI-S3	Asymmetric	MACULAR	SPINY SHAFT	133858	124488
AB2	II-NI	AB2-LII-NI-S3	Asymmetric	MACULAR	SPINE HEAD	134160	124769
AB2	II-NI	AB2-LII-NI-S3	Asymmetric	MACULAR	SPINY SHAFT	136170	126638
AB2	II-NI	AB2-LII-NI-S3	Asymmetric	MACULAR	SPINY SHAFT	138578	128878
AB2	II-NI	AB2-LII-NI-S3	Asymmetric	MACULAR	SPINY SHAFT	138956	129229
AB2	II-NI	AB2-LII-NI-S3	Asymmetric	MACULAR	SPINY SHAFT	139948	130151
AB2	II-NI	AB2-LII-NI-S3	Asymmetric	MACULAR	ASPINY SHAFT	142202	132248
AB2	II-NI	AB2-LII-NI-S3	Asymmetric	PERFORATED	SPINE HEAD	143124	133105
AB2	II-NI	AB2-LII-NI-S3	Asymmetric	MACULAR	SPINY SHAFT	145114	134956
AB2	II-NI	AB2-LII-NI-S3	Asymmetric	MACULAR	ASPINY SHAFT	147106	136809
AB2	II-NI	AB2-LII-NI-S3	Asymmetric	MACULAR	SPINE HEAD	147264	136955
AB2	II-NI	AB2-LII-NI-S3	Asymmetric	MACULAR	SPINY SHAFT	147472	137149
AB2	II-NI	AB2-LII-NI-S3	Asymmetric	MACULAR	ASPINY SHAFT	148701	138292
AB2	II-NI	AB2-LII-NI-S3	Asymmetric	MACULAR	SPINY SHAFT	149427	138967
AB2	II-NI	AB2-LII-NI-S3	Asymmetric	MACULAR	SPINY SHAFT	150905	140342
AB2	II-NI	AB2-LII-NI-S3	Asymmetric	MACULAR	SPINY SHAFT	151028	140456
AB2	II-NI	AB2-LII-NI-S3	Asymmetric	MACULAR	SPINE HEAD	152544	141865
AB2	II-NI	AB2-LII-NI-S3	Asymmetric	MACULAR	PUT SPINE HEAD	154354	143550
AB2	II-NI	AB2-LII-NI-S3	Asymmetric	MACULAR	ASPINY SHAFT	155062	144208
AB2	II-NI	AB2-LII-NI-S3	Asymmetric	MACULAR	ASPINY SHAFT	157157	146156
AB2	II-NI	AB2-LII-NI-S3	Asymmetric	MACULAR	SPINY SHAFT	160088	148882
AB2	II-NI	AB2-LII-NI-S3	Asymmetric	MACULAR	SPINY SHAFT	162688	151300
AB2	II-NI	AB2-LII-NI-S3	Asymmetric	MACULAR	SPINE HEAD	163933	152458
AB2	II-NI	AB2-LII-NI-S3	Symmetric	MACULAR	ASPINY SHAFT	85243.1	79276.1
AB2	II-NI	AB2-LII-NI-S3	Asymmetric	MACULAR	ASPINY SHAFT	165439	153859
AB2	II-NI	AB2-LII-NI-S3	Asymmetric	MACULAR	SPINY SHAFT	165575	153984
AB2	II-NI	AB2-LII-NI-S3	Asymmetric	MACULAR	PUT SPINE HEAD	166997	155307
AB2	II-NI	AB2-LII-NI-S3	Asymmetric	MACULAR	SPINE HEAD	168074	156309
AB2	II-NI	AB2-LII-NI-S3	Asymmetric	MACULAR	SPINE HEAD	168512	156717
AB2	II-NI	AB2-LII-NI-S3	Asymmetric	PERFORATED	SPINE HEAD	172128	160079
AB2	II-NI	AB2-LII-NI-S3	Asymmetric	PERFORATED	PUT SPINE HEAD	172758	160665
AB2	II-NI	AB2-LII-NI-S3	Asymmetric	MACULAR	SPINY SHAFT	173087	160971
AB2	II-NI	AB2-LII-NI-S3	Asymmetric	MACULAR	SPINE HEAD	174444	162233
AB2	II-NI	AB2-LII-NI-S3	Asymmetric	HORSESHOE	SPINE HEAD	175017	162765
AB2	II-NI	AB2-LII-NI-S3	Asymmetric	MACULAR	SPINE HEAD	175115	162857
AB2	II-NI	AB2-LII-NI-S3	Asymmetric	MACULAR	SPINE HEAD	177058	164664
AB2	II-NI	AB2-LII-NI-S3	Asymmetric	PERFORATED	SPINE HEAD	181494	168789
AB2	II-NI	AB2-LII-NI-S3	Asymmetric	MACULAR	SPINY SHAFT	185756	172753
AB2	II-NI	AB2-LII-NI-S3	Asymmetric	MACULAR	SPINE HEAD	188550	175352
AB2	II-NI	AB2-LII-NI-S3	Asymmetric	MACULAR	ASPINY SHAFT	192837	179339
AB2	II-NI	AB2-LII-NI-S3	Asymmetric	MACULAR	ASPINY SHAFT	195789	182084
AB2	II-NI	AB2-LII-NI-S3	Asymmetric	PERFORATED	SPINE HEAD	203972	189694
AB2	II-NI	AB2-LII-NI-S3	Asymmetric	MACULAR	SPINY SHAFT	205284	190914
AB2	II-NI	AB2-LII-NI-S3	Asymmetric	MACULAR	ASPINY SHAFT	209665	194988
AB2	II-NI	AB2-LII-NI-S3	Asymmetric	MACULAR	ASPINY SHAFT	209968	195270
AB2	II-NI	AB2-LII-NI-S3	Asymmetric	MACULAR	ASPINY SHAFT	211460	196658
AB2	II-NI	AB2-LII-NI-S3	Asymmetric	MACULAR	PUT SPINE HEAD	212619	197736
AB2	II-NI	AB2-LII-NI-S3	Asymmetric	MACULAR	SPINE HEAD	220713	205263
AB2	II-NI	AB2-LII-NI-S3	Asymmetric	PERFORATED	ASPINY SHAFT	235136	218676
AB2	II-NI	AB2-LII-NI-S3	Symmetric	MACULAR	ASPINY SHAFT	125391	116613
AB2	II-NI	AB2-LII-NI-S3	Symmetric	MACULAR	ASPINY SHAFT	126075	117250
AB2	II-NI	AB2-LII-NI-S3	Asymmetric	MACULAR	SPINY SHAFT	245100	227943
AB2	II-NI	AB2-LII-NI-S3	Asymmetric	MACULAR	SPINE HEAD	246411	229162
AB2	II-NI	AB2-LII-NI-S3	Asymmetric	PERFORATED	PUT SPINE HEAD	270372	251446
AB2	II-NI	AB2-LII-NI-S3	Asymmetric	MACULAR	SPINY SHAFT	311142	289362
AB2	II-NI	AB2-LII-NI-S3	Asymmetric	MACULAR	SPINY SHAFT	312019	290177
AB2	I	AB2-LI-S1	Asymmetric	MACULAR	ASPINY SHAFT	9565.25	8895.69
AB2	I	AB2-LI-S1	Asymmetric	MACULAR	UNKNOWN	12123.6	11275
AB2	I	AB2-LI-S1	Asymmetric	MACULAR	PUT SPINE HEAD	13324.3	12391.6
AB2	I	AB2-LI-S1	Symmetric	MACULAR	UNKNOWN	7778.41	7233.92
AB2	I	AB2-LI-S1	Symmetric	MACULAR	ASPINY SHAFT	10456.2	9724.29
AB2	I	AB2-LI-S1	Symmetric	MACULAR	SPINY SHAFT	10955.9	10189
AB2	I	AB2-LI-S1	Asymmetric	MACULAR	PUT SPINE HEAD	23127.7	21508.7
AB2	I	AB2-LI-S1	Asymmetric	MACULAR	SPINE HEAD	24146.5	22456.3
AB2	I	AB2-LI-S1	Asymmetric	MACULAR	SPINE HEAD	24177.3	22484.9
AB2	I	AB2-LI-S1	Asymmetric	MACULAR	SPINE HEAD	24198.1	22504.2
AB2	I	AB2-LI-S1	Asymmetric	MACULAR	SPINE HEAD	25670.2	23873.3
AB2	I	AB2-LI-S1	Asymmetric	MACULAR	UNKNOWN	25758.4	23955.3
AB2	I	AB2-LI-S1	Asymmetric	MACULAR	PUT SPINE HEAD	26075.9	24250.6
AB2	I	AB2-LI-S1	Asymmetric	MACULAR	ASPINY SHAFT	27207.2	25302.7
AB2	I	AB2-LI-S1	Asymmetric	MACULAR	SPINE HEAD	29832.1	27743.8
AB2	I	AB2-LI-S1	Asymmetric	MACULAR	SPINE HEAD	30891.5	28729.1
AB2	I	AB2-LI-S1	Symmetric	FRAGMENTED	ASPINY SHAFT	23526.3	21879.5
AB2	I	AB2-LI-S1	Asymmetric	MACULAR	ASPINY SHAFT	31687.5	29469.4
AB2	I	AB2-LI-S1	Asymmetric	MACULAR	ASPINY SHAFT	32299.4	30038.4
AB2	I	AB2-LI-S1	Asymmetric	MACULAR	SPINE HEAD	33164.8	30843.3
AB2	I	AB2-LI-S1	Asymmetric	MACULAR	UNKNOWN	35931.7	33416.5
AB2	I	AB2-LI-S1	Asymmetric	MACULAR	SPINE HEAD	36435.7	33885.2
AB2	I	AB2-LI-S1	Symmetric	PERFORATED	ASPINY SHAFT	30607.1	28464.6
AB2	I	AB2-LI-S1	Asymmetric	MACULAR	SPINE HEAD	37937.2	35281.6
AB2	I	AB2-LI-S1	Asymmetric	MACULAR	UNKNOWN	38196.1	35522.4
AB2	I	AB2-LI-S1	Asymmetric	MACULAR	ASPINY SHAFT	38575	35874.7
AB2	I	AB2-LI-S1	Asymmetric	MACULAR	ASPINY SHAFT	39812.4	37025.5
AB2	I	AB2-LI-S1	Asymmetric	MACULAR	SPINE HEAD	39971.2	37173.3
AB2	I	AB2-LI-S1	Asymmetric	MACULAR	SPINE HEAD	40002.6	37202.4
AB2	I	AB2-LI-S1	Asymmetric	MACULAR	SPINY SHAFT	41740.4	38818.6
AB2	I	AB2-LI-S1	Asymmetric	MACULAR	SPINE HEAD	41994.3	39054.7
AB2	I	AB2-LI-S1	Asymmetric	MACULAR	ASPINY SHAFT	43789.7	40724.5
AB2	I	AB2-LI-S1	Asymmetric	MACULAR	ASPINY SHAFT	43916.4	40842.3
AB2	I	AB2-LI-S1	Asymmetric	PERFORATED	ASPINY SHAFT	44379.6	41273
AB2	I	AB2-LI-S1	Asymmetric	MACULAR	UNKNOWN	45929	42713.9
AB2	I	AB2-LI-S1	Asymmetric	MACULAR	PUT SPINE HEAD	46698.4	43429.5
AB2	I	AB2-LI-S1	Asymmetric	MACULAR	ASPINY SHAFT	48057.6	44693.5
AB2	I	AB2-LI-S1	Asymmetric	MACULAR	SPINE HEAD	48269.2	44890.4
AB2	I	AB2-LI-S1	Asymmetric	MACULAR	UNKNOWN	49098.2	45661.3
AB2	I	AB2-LI-S1	Asymmetric	MACULAR	UNKNOWN	50570.2	47030.3
AB2	I	AB2-LI-S1	Asymmetric	MACULAR	SPINE HEAD	50669.2	47122.3
AB2	I	AB2-LI-S1	Asymmetric	MACULAR	ASPINY SHAFT	51091	47514.6
AB2	I	AB2-LI-S1	Symmetric	MACULAR	ASPINY SHAFT	37692.1	35053.7
AB2	I	AB2-LI-S1	Asymmetric	MACULAR	UNKNOWN	52384.4	48717.5
AB2	I	AB2-LI-S1	Asymmetric	MACULAR	UNKNOWN	54062.7	50278.3
AB2	I	AB2-LI-S1	Asymmetric	MACULAR	UNKNOWN	54103.3	50316
AB2	I	AB2-LI-S1	Asymmetric	MACULAR	PUT SPINE HEAD	59385	55228.1
AB2	I	AB2-LI-S1	Asymmetric	MACULAR	ASPINY SHAFT	62334.4	57971
AB2	I	AB2-LI-S1	Symmetric	MACULAR	NECK	43604.4	40552
AB2	I	AB2-LI-S1	Asymmetric	PERFORATED	ASPINY SHAFT	66248.8	61611.4
AB2	I	AB2-LI-S1	Asymmetric	PERFORATED	SPINY SHAFT	68496.3	63701.5
AB2	I	AB2-LI-S1	Asymmetric	MACULAR	ASPINY SHAFT	72565	67485.4
AB2	I	AB2-LI-S1	Asymmetric	MACULAR	SPINE HEAD	73351.6	68216.9
AB2	I	AB2-LI-S1	Asymmetric	MACULAR	SPINE HEAD	74041.1	68858.2
AB2	I	AB2-LI-S1	Asymmetric	PERFORATED	SPINY SHAFT	74390.3	69183
AB2	I	AB2-LI-S1	Asymmetric	PERFORATED	SPINY SHAFT	75888.2	70576.1
AB2	I	AB2-LI-S1	Asymmetric	MACULAR	SPINE HEAD	77290.7	71880.3
AB2	I	AB2-LI-S1	Asymmetric	MACULAR	SPINE HEAD	77935.6	72480.1
AB2	I	AB2-LI-S1	Symmetric	MACULAR	ASPINY SHAFT	49452.8	45991.1
AB2	I	AB2-LI-S1	Asymmetric	MACULAR	UNKNOWN	79394	73836.4
AB2	I	AB2-LI-S1	Asymmetric	MACULAR	SPINY SHAFT	80436.8	74806.2
AB2	I	AB2-LI-S1	Asymmetric	MACULAR	SPINY SHAFT	81201.8	75517.7
AB2	I	AB2-LI-S1	Asymmetric	MACULAR	PUT SPINE HEAD	81296.1	75605.3
AB2	I	AB2-LI-S1	Asymmetric	MACULAR	ASPINY SHAFT	82959.8	77152.6
AB2	I	AB2-LI-S1	Asymmetric	MACULAR	UNKNOWN	84268.4	78369.6
AB2	I	AB2-LI-S1	Asymmetric	MACULAR	SPINY SHAFT	86682.9	80615.1
AB2	I	AB2-LI-S1	Asymmetric	MACULAR	SPINE HEAD	87675.9	81538.6
AB2	I	AB2-LI-S1	Asymmetric	MACULAR	ASPINY SHAFT	87967.6	81809.8
AB2	I	AB2-LI-S1	Asymmetric	MACULAR	SPINY SHAFT	90696.9	84348.1
AB2	I	AB2-LI-S1	Asymmetric	PERFORATED	PUT SPINE HEAD	91023.3	84651.7
AB2	I	AB2-LI-S1	Asymmetric	MACULAR	PUT SPINE HEAD	91526.5	85119.7
AB2	I	AB2-LI-S1	Asymmetric	MACULAR	PUT SPINE HEAD	93886	87314
AB2	I	AB2-LI-S1	Asymmetric	MACULAR	SPINE HEAD	94281.8	87682.1
AB2	I	AB2-LI-S1	Asymmetric	MACULAR	SPINY SHAFT	95098.6	88441.7
AB2	I	AB2-LI-S1	Asymmetric	MACULAR	PUT SPINE HEAD	95754.1	89051.3
AB2	I	AB2-LI-S1	Asymmetric	PERFORATED	PUT SPINE HEAD	95776.8	89072.4
AB2	I	AB2-LI-S1	Asymmetric	MACULAR	SPINE HEAD	95958	89240.9
AB2	I	AB2-LI-S1	Asymmetric	MACULAR	ASPINY SHAFT	96499.1	89744.1
AB2	I	AB2-LI-S1	Asymmetric	MACULAR	SPINY SHAFT	96985.2	90196.3
AB2	I	AB2-LI-S1	Asymmetric	MACULAR	PUT SPINE HEAD	98393.6	91506.1
AB2	I	AB2-LI-S1	Asymmetric	HORSESHOE	ASPINY SHAFT	99112.2	92174.3
AB2	I	AB2-LI-S1	Asymmetric	MACULAR	SPINY SHAFT	99583.5	92612.7
AB2	I	AB2-LI-S1	Asymmetric	MACULAR	SPINE HEAD	100286	93266.3
AB2	I	AB2-LI-S1	Asymmetric	MACULAR	ASPINY SHAFT	103141	95920.7
AB2	I	AB2-LI-S1	Asymmetric	MACULAR	ASPINY SHAFT	104232	96936.2
AB2	I	AB2-LI-S1	Asymmetric	MACULAR	PUT SPINE HEAD	104662	97335.9
AB2	I	AB2-LI-S1	Asymmetric	MACULAR	ASPINY SHAFT	106132	98702.8
AB2	I	AB2-LI-S1	Asymmetric	MACULAR	SPINY SHAFT	108117	100549
AB2	I	AB2-LI-S1	Asymmetric	MACULAR	SPINY SHAFT	108127	100558
AB2	I	AB2-LI-S1	Asymmetric	MACULAR	SPINY SHAFT	108388	100801
AB2	I	AB2-LI-S1	Asymmetric	MACULAR	UNKNOWN	108933	101308
AB2	I	AB2-LI-S1	Asymmetric	MACULAR	UNKNOWN	109131	101492
AB2	I	AB2-LI-S1	Asymmetric	MACULAR	ASPINY SHAFT	109956	102259
AB2	I	AB2-LI-S1	Asymmetric	MACULAR	SPINE HEAD	110531	102794
AB2	I	AB2-LI-S1	Asymmetric	MACULAR	SPINE HEAD	110671	102924
AB2	I	AB2-LI-S1	Asymmetric	MACULAR	ASPINY SHAFT	111051	103277
AB2	I	AB2-LI-S1	Asymmetric	MACULAR	SPINE HEAD	111104	103327
AB2	I	AB2-LI-S1	Asymmetric	MACULAR	SPINE HEAD	112563	104684
AB2	I	AB2-LI-S1	Asymmetric	MACULAR	SPINE HEAD	113282	105352
AB2	I	AB2-LI-S1	Asymmetric	MACULAR	ASPINY SHAFT	113530	105583
AB2	I	AB2-LI-S1	Asymmetric	MACULAR	ASPINY SHAFT	114099	106112
AB2	I	AB2-LI-S1	Asymmetric	MACULAR	ASPINY SHAFT	116432	108282
AB2	I	AB2-LI-S1	Asymmetric	PERFORATED	PUT SPINE HEAD	116558	108399
AB2	I	AB2-LI-S1	Asymmetric	MACULAR	SPINY SHAFT	117000	108810
AB2	I	AB2-LI-S1	Asymmetric	MACULAR	SPINE HEAD	117988	109729
AB2	I	AB2-LI-S1	Asymmetric	MACULAR	SPINE HEAD	118824	110506
AB2	I	AB2-LI-S1	Asymmetric	MACULAR	SPINY SHAFT	120154	111744
AB2	I	AB2-LI-S1	Symmetric	MACULAR	ASPINY SHAFT	64505.6	59990.2
AB2	I	AB2-LI-S1	Asymmetric	MACULAR	ASPINY SHAFT	122964	114356
AB2	I	AB2-LI-S1	Asymmetric	MACULAR	SPINE HEAD	123336	114703
AB2	I	AB2-LI-S1	Asymmetric	MACULAR	ASPINY SHAFT	123434	114793
AB2	I	AB2-LI-S1	Asymmetric	MACULAR	SPINE HEAD	123916	115242
AB2	I	AB2-LI-S1	Asymmetric	MACULAR	ASPINY SHAFT	124625	115901
AB2	I	AB2-LI-S1	Asymmetric	MACULAR	SPINE HEAD	125420	116641
AB2	I	AB2-LI-S1	Asymmetric	MACULAR	SPINY SHAFT	126966	118078
AB2	I	AB2-LI-S1	Asymmetric	MACULAR	SPINE HEAD	127096	118200
AB2	I	AB2-LI-S1	Asymmetric	MACULAR	SPINY SHAFT	127521	118594
AB2	I	AB2-LI-S1	Asymmetric	MACULAR	UNKNOWN	127691	118753
AB2	I	AB2-LI-S1	Asymmetric	MACULAR	ASPINY SHAFT	127880	118928
AB2	I	AB2-LI-S1	Asymmetric	MACULAR	SPINE HEAD	128595	119594
AB2	I	AB2-LI-S1	Asymmetric	MACULAR	SPINE HEAD	128806	119789
AB2	I	AB2-LI-S1	Asymmetric	MACULAR	PUT SPINE HEAD	130104	120997
AB2	I	AB2-LI-S1	Asymmetric	MACULAR	SPINE HEAD	130590	121449
AB2	I	AB2-LI-S1	Asymmetric	MACULAR	SPINE HEAD	131471	122268
AB2	I	AB2-LI-S1	Asymmetric	MACULAR	ASPINY SHAFT	132186	122933
AB2	I	AB2-LI-S1	Asymmetric	MACULAR	SPINY SHAFT	132904	123600
AB2	I	AB2-LI-S1	Asymmetric	MACULAR	ASPINY SHAFT	132924	123619
AB2	I	AB2-LI-S1	Asymmetric	HORSESHOE	UNKNOWN	133009	123699
AB2	I	AB2-LI-S1	Asymmetric	MACULAR	SPINY SHAFT	134739	125307
AB2	I	AB2-LI-S1	Asymmetric	MACULAR	SPINY SHAFT	134907	125464
AB2	I	AB2-LI-S1	Asymmetric	MACULAR	PUT SPINE HEAD	137279	127670
AB2	I	AB2-LI-S1	Asymmetric	MACULAR	UNKNOWN	137594	127962
AB2	I	AB2-LI-S1	Asymmetric	MACULAR	ASPINY SHAFT	137887	128235
AB2	I	AB2-LI-S1	Asymmetric	MACULAR	SPINE HEAD	138378	128692
AB2	I	AB2-LI-S1	Asymmetric	MACULAR	SPINE HEAD	138612	128909
AB2	I	AB2-LI-S1	Asymmetric	MACULAR	SPINE HEAD	138650	128944
AB2	I	AB2-LI-S1	Asymmetric	MACULAR	SPINE HEAD	139965	130168
AB2	I	AB2-LI-S1	Asymmetric	MACULAR	SPINE HEAD	140550	130711
AB2	I	AB2-LI-S1	Asymmetric	MACULAR	ASPINY SHAFT	142681	132693
AB2	I	AB2-LI-S1	Asymmetric	MACULAR	SPINY SHAFT	142821	132823
AB2	I	AB2-LI-S1	Asymmetric	MACULAR	PUT SPINE HEAD	143349	133314
AB2	I	AB2-LI-S1	Asymmetric	MACULAR	PUT SPINE HEAD	144934	134789
AB2	I	AB2-LI-S1	Asymmetric	MACULAR	ASPINY SHAFT	145951	135735
AB2	I	AB2-LI-S1	Asymmetric	MACULAR	ASPINY SHAFT	148078	137712
AB2	I	AB2-LI-S1	Asymmetric	MACULAR	ASPINY SHAFT	150392	139865
AB2	I	AB2-LI-S1	Symmetric	PERFORATED	ASPINY SHAFT	77319.9	71907.5
AB2	I	AB2-LI-S1	Asymmetric	MACULAR	SPINE HEAD	151539	140931
AB2	I	AB2-LI-S1	Asymmetric	MACULAR	SPINY SHAFT	153148	142427
AB2	I	AB2-LI-S1	Asymmetric	MACULAR	SPINY SHAFT	156049	145126
AB2	I	AB2-LI-S1	Asymmetric	PERFORATED	SPINE HEAD	158749	147637
AB2	I	AB2-LI-S1	Asymmetric	MACULAR	ASPINY SHAFT	161491	150186
AB2	I	AB2-LI-S1	Asymmetric	MACULAR	SPINE HEAD	163712	152253
AB2	I	AB2-LI-S1	Asymmetric	PERFORATED	UNKNOWN	167182	155479
AB2	I	AB2-LI-S1	Asymmetric	MACULAR	SPINE HEAD	172254	160196
AB2	I	AB2-LI-S1	Symmetric	MACULAR	ASPINY SHAFT	92095.1	85648.5
AB2	I	AB2-LI-S1	Asymmetric	MACULAR	ASPINY SHAFT	176379	164032
AB2	I	AB2-LI-S1	Asymmetric	MACULAR	UNKNOWN	183586	170735
AB2	I	AB2-LI-S1	Asymmetric	PERFORATED	PUT SPINE HEAD	195513	181827
AB2	I	AB2-LI-S1	Asymmetric	MACULAR	UNKNOWN	213168	198246
AB2	I	AB2-LI-S1	Asymmetric	MACULAR	SPINE HEAD	214549	199531
AB2	I	AB2-LI-S1	Asymmetric	MACULAR	ASPINY SHAFT	218864	203544
AB2	I	AB2-LI-S1	Asymmetric	PERFORATED	SPINE HEAD	232328	216065
AB2	I	AB2-LI-S1	Asymmetric	PERFORATED	SPINE HEAD	240274	223455
AB2	I	AB2-LI-S1	Asymmetric	MACULAR	SPINE HEAD	257744	239702
AB2	I	AB2-LI-S2	Asymmetric	MACULAR	UNKNOWN	12378.3	11511.8
AB2	I	AB2-LI-S2	Asymmetric	MACULAR	SPINE HEAD	19131.5	17792.3
AB2	I	AB2-LI-S2	Asymmetric	MACULAR	UNKNOWN	20400.5	18972.5
AB2	I	AB2-LI-S2	Asymmetric	MACULAR	PUT SPINE HEAD	20488.7	19054.5
AB2	I	AB2-LI-S2	Symmetric	MACULAR	ASPINY SHAFT	12202	11347.9
AB2	I	AB2-LI-S2	Asymmetric	MACULAR	ASPINY SHAFT	24234.5	22538.1
AB2	I	AB2-LI-S2	Asymmetric	MACULAR	ASPINY SHAFT	26006.5	24186
AB2	I	AB2-LI-S2	Asymmetric	MACULAR	UNKNOWN	27306.3	25394.9
AB2	I	AB2-LI-S2	Symmetric	MACULAR	ASPINY SHAFT	19559.6	18190.4
AB2	I	AB2-LI-S2	Symmetric	MACULAR	ASPINY SHAFT	21084.8	19608.9
AB2	I	AB2-LI-S2	Asymmetric	MACULAR	SPINE HEAD	29157.3	27116.3
AB2	I	AB2-LI-S2	Asymmetric	MACULAR	SPINE HEAD	29289.9	27239.6
AB2	I	AB2-LI-S2	Asymmetric	MACULAR	SPINY SHAFT	29793.4	27707.9
AB2	I	AB2-LI-S2	Asymmetric	MACULAR	ASPINY SHAFT	30513.9	28377.9
AB2	I	AB2-LI-S2	Asymmetric	MACULAR	ASPINY SHAFT	30792	28636.6
AB2	I	AB2-LI-S2	Symmetric	MACULAR	ASPINY SHAFT	23195.7	21572
AB2	I	AB2-LI-S2	Asymmetric	MACULAR	SPINE HEAD	32519.5	30243.1
AB2	I	AB2-LI-S2	Asymmetric	MACULAR	SPINE HEAD	34070	31685.1
AB2	I	AB2-LI-S2	Asymmetric	MACULAR	SPINE HEAD	35868.3	33357.5
AB2	I	AB2-LI-S2	Asymmetric	MACULAR	SPINE HEAD	39428.3	36668.3
AB2	I	AB2-LI-S2	Asymmetric	MACULAR	ASPINY SHAFT	41466.7	38564
AB2	I	AB2-LI-S2	Asymmetric	MACULAR	UNKNOWN	41726.2	38805.3
AB2	I	AB2-LI-S2	Asymmetric	MACULAR	SPINE HEAD	42392.1	39424.6
AB2	I	AB2-LI-S2	Asymmetric	MACULAR	SPINE HEAD	43144.1	40124.1
AB2	I	AB2-LI-S2	Asymmetric	MACULAR	ASPINY SHAFT	44543.2	41425.1
AB2	I	AB2-LI-S2	Asymmetric	MACULAR	ASPINY SHAFT	46056.6	42832.7
AB2	I	AB2-LI-S2	Asymmetric	MACULAR	SPINE HEAD	46489.1	43234.9
AB2	I	AB2-LI-S2	Asymmetric	MACULAR	SPINE HEAD	46876.4	43595
AB2	I	AB2-LI-S2	Asymmetric	MACULAR	ASPINY SHAFT	47031	43738.8
AB2	I	AB2-LI-S2	Symmetric	MACULAR	ASPINY SHAFT	35992.2	33472.7
AB2	I	AB2-LI-S2	Asymmetric	MACULAR	SPINE HEAD	47831.8	44483.6
AB2	I	AB2-LI-S2	Asymmetric	MACULAR	UNKNOWN	55468.7	51585.9
AB2	I	AB2-LI-S2	Symmetric	MACULAR	ASPINY SHAFT	40344.1	37520
AB2	I	AB2-LI-S2	Asymmetric	MACULAR	ASPINY SHAFT	58217.3	54142.1
AB2	I	AB2-LI-S2	Asymmetric	MACULAR	PUT SPINE HEAD	60211.2	55996.4
AB2	I	AB2-LI-S2	Asymmetric	MACULAR	UNKNOWN	60472	56239
AB2	I	AB2-LI-S2	Symmetric	MACULAR	ASPINY SHAFT	42673.2	39686.1
AB2	I	AB2-LI-S2	Asymmetric	MACULAR	ASPINY SHAFT	66061.7	61437.4
AB2	I	AB2-LI-S2	Asymmetric	MACULAR	PUT SPINE HEAD	66806.1	62129.6
AB2	I	AB2-LI-S2	Asymmetric	MACULAR	ASPINY SHAFT	68996.8	64167
AB2	I	AB2-LI-S2	Asymmetric	MACULAR	SPINY SHAFT	69222	64376.5
AB2	I	AB2-LI-S2	Asymmetric	MACULAR	SPINE HEAD	71177.1	66194.7
AB2	I	AB2-LI-S2	Asymmetric	MACULAR	SPINY SHAFT	73596.6	68444.8
AB2	I	AB2-LI-S2	Asymmetric	MACULAR	SPINE HEAD	75361.9	70086.6
AB2	I	AB2-LI-S2	Asymmetric	MACULAR	SPINE HEAD	75449.5	70168.1
AB2	I	AB2-LI-S2	Asymmetric	MACULAR	ASPINY SHAFT	77076.6	71681.2
AB2	I	AB2-LI-S2	Symmetric	MACULAR	ASPINY SHAFT	49710.6	46230.9
AB2	I	AB2-LI-S2	Asymmetric	MACULAR	ASPINY SHAFT	81720.8	76000.3
AB2	I	AB2-LI-S2	Asymmetric	HORSESHOE	SPINY SHAFT	84654.4	78728.6
AB2	I	AB2-LI-S2	Symmetric	MACULAR	SPINY SHAFT	50263.2	46744.8
AB2	I	AB2-LI-S2	Asymmetric	MACULAR	SPINE HEAD	86749.7	80677.2
AB2	I	AB2-LI-S2	Symmetric	MACULAR	ASPINY SHAFT	53587.7	49836.6
AB2	I	AB2-LI-S2	Asymmetric	MACULAR	SPINY SHAFT	89778.1	83493.6
AB2	I	AB2-LI-S2	Asymmetric	MACULAR	SPINE HEAD	93091.8	86575.4
AB2	I	AB2-LI-S2	Asymmetric	MACULAR	ASPINY SHAFT	95844.8	89135.7
AB2	I	AB2-LI-S2	Asymmetric	PERFORATED	UNKNOWN	96008.5	89287.9
AB2	I	AB2-LI-S2	Asymmetric	MACULAR	SPINY SHAFT	96702.3	89933.2
AB2	I	AB2-LI-S2	Asymmetric	MACULAR	SPINY SHAFT	98348.8	91464.3
AB2	I	AB2-LI-S2	Asymmetric	MACULAR	SPINE HEAD	105539	98151.5
AB2	I	AB2-LI-S2	Asymmetric	MACULAR	ASPINY SHAFT	105545	98157.3
AB2	I	AB2-LI-S2	Asymmetric	MACULAR	PUT SPINE HEAD	106444	98993.2
AB2	I	AB2-LI-S2	Asymmetric	MACULAR	SPINY SHAFT	107446	99924.4
AB2	I	AB2-LI-S2	Asymmetric	MACULAR	PUT SPINE HEAD	107663	100126
AB2	I	AB2-LI-S2	Asymmetric	MACULAR	ASPINY SHAFT	109432	101771
AB2	I	AB2-LI-S2	Asymmetric	MACULAR	PUT SPINE HEAD	109629	101955
AB2	I	AB2-LI-S2	Asymmetric	MACULAR	PUT SPINE HEAD	110239	102522
AB2	I	AB2-LI-S2	Asymmetric	MACULAR	ASPINY SHAFT	110903	103140
AB2	I	AB2-LI-S2	Asymmetric	MACULAR	SPINE HEAD	111689	103871
AB2	I	AB2-LI-S2	Asymmetric	PERFORATED	PUT SPINE HEAD	111828	104000
AB2	I	AB2-LI-S2	Asymmetric	MACULAR	PUT SPINE HEAD	114967	106919
AB2	I	AB2-LI-S2	Asymmetric	MACULAR	SPINE HEAD	115220	107154
AB2	I	AB2-LI-S2	Asymmetric	MACULAR	SPINE HEAD	116991	108801
AB2	I	AB2-LI-S2	Asymmetric	MACULAR	SPINE HEAD	117484	109260
AB2	I	AB2-LI-S2	Asymmetric	MACULAR	SPINY SHAFT	117528	109301
AB2	I	AB2-LI-S2	Asymmetric	MACULAR	ASPINY SHAFT	118902	110579
AB2	I	AB2-LI-S2	Asymmetric	MACULAR	SPINY SHAFT	123672	115015
AB2	I	AB2-LI-S2	Asymmetric	MACULAR	SPINE HEAD	124124	115436
AB2	I	AB2-LI-S2	Asymmetric	MACULAR	ASPINY SHAFT	125051	116297
AB2	I	AB2-LI-S2	Asymmetric	MACULAR	ASPINY SHAFT	125182	116420
AB2	I	AB2-LI-S2	Asymmetric	MACULAR	ASPINY SHAFT	127848	118898
AB2	I	AB2-LI-S2	Asymmetric	MACULAR	PUT SPINE HEAD	128330	119347
AB2	I	AB2-LI-S2	Asymmetric	MACULAR	SPINE HEAD	130037	120934
AB2	I	AB2-LI-S2	Asymmetric	MACULAR	SPINE HEAD	134090	124704
AB2	I	AB2-LI-S2	Asymmetric	MACULAR	SPINY SHAFT	134457	125045
AB2	I	AB2-LI-S2	Asymmetric	MACULAR	SPINE HEAD	135167	125705
AB2	I	AB2-LI-S2	Asymmetric	MACULAR	SPINE HEAD	136291	126751
AB2	I	AB2-LI-S2	Asymmetric	MACULAR	ASPINY SHAFT	138217	128542
AB2	I	AB2-LI-S2	Asymmetric	MACULAR	SPINE HEAD	138593	128891
AB2	I	AB2-LI-S2	Asymmetric	PERFORATED	SPINE HEAD	139886	130094
AB2	I	AB2-LI-S2	Asymmetric	MACULAR	SPINE HEAD	141165	131283
AB2	I	AB2-LI-S2	Asymmetric	MACULAR	SPINE HEAD	141774	131850
AB2	I	AB2-LI-S2	Asymmetric	MACULAR	ASPINY SHAFT	143703	133644
AB2	I	AB2-LI-S2	Asymmetric	MACULAR	UNKNOWN	144997	134848
AB2	I	AB2-LI-S2	Asymmetric	MACULAR	PUT SPINE HEAD	145890	135678
AB2	I	AB2-LI-S2	Asymmetric	MACULAR	PUT SPINE HEAD	146217	135982
AB2	I	AB2-LI-S2	Asymmetric	MACULAR	SPINY SHAFT	148688	138280
AB2	I	AB2-LI-S2	Asymmetric	MACULAR	SPINY SHAFT	149734	139252
AB2	I	AB2-LI-S2	Asymmetric	MACULAR	SPINY SHAFT	150427	139897
AB2	I	AB2-LI-S2	Asymmetric	MACULAR	SPINE HEAD	151514	140908
AB2	I	AB2-LI-S2	Asymmetric	MACULAR	SPINE HEAD	151845	141215
AB2	I	AB2-LI-S2	Asymmetric	MACULAR	SPINE HEAD	156173	145241
AB2	I	AB2-LI-S2	Asymmetric	MACULAR	SPINY SHAFT	160038	148836
AB2	I	AB2-LI-S2	Asymmetric	MACULAR	SPINY SHAFT	160407	149179
AB2	I	AB2-LI-S2	Asymmetric	MACULAR	SPINE HEAD	162383	151016
AB2	I	AB2-LI-S2	Asymmetric	PERFORATED	SPINE HEAD	162451	151080
AB2	I	AB2-LI-S2	Asymmetric	MACULAR	SPINE HEAD	163444	152003
AB2	I	AB2-LI-S2	Asymmetric	MACULAR	ASPINY SHAFT	166985	155296
AB2	I	AB2-LI-S2	Asymmetric	MACULAR	SPINE HEAD	168529	156732
AB2	I	AB2-LI-S2	Asymmetric	MACULAR	SPINE HEAD	170347	158423
AB2	I	AB2-LI-S2	Asymmetric	MACULAR	ASPINY SHAFT	176189	163856
AB2	I	AB2-LI-S2	Asymmetric	MACULAR	ASPINY SHAFT	185487	172503
AB2	I	AB2-LI-S2	Asymmetric	MACULAR	SPINE HEAD	189099	175862
AB2	I	AB2-LI-S2	Asymmetric	MACULAR	PUT SPINE HEAD	192974	179466
AB2	I	AB2-LI-S2	Asymmetric	PERFORATED	SPINE HEAD	236681	220114
AB2	I	AB2-LI-S2	Asymmetric	MACULAR	UNKNOWN	254132	236342
AB2	I	AB2-LI-S2	Asymmetric	PERFORATED	PUT SPINE HEAD	266850	248170
AB2	I	AB2-LI-S2	Symmetric	FRAGMENTED	ASPINY SHAFT	162850	151451
AB2	I	AB2-LI-S2	Asymmetric	PERFORATED	SPINE HEAD	349909	325416
AB2	I	AB2-LI-S2	Asymmetric	PERFORATED	SPINE HEAD	383484	356640
AB2	I	AB2-LI-S2	Asymmetric	HORSESHOE	SPINY SHAFT	383484	356640
AB2	I	AB2-LI-S2	Asymmetric	FRAGMENTED	UNKNOWN	426413	396564
AB2	I	AB2-LI-S3	Asymmetric	MACULAR	SPINE HEAD	14928.9	13883.9
AB2	I	AB2-LI-S3	Asymmetric	MACULAR	SPINE HEAD	16286.1	15146
AB2	I	AB2-LI-S3	Symmetric	MACULAR	ASPINY SHAFT	8323.9	7741.23
AB2	I	AB2-LI-S3	Asymmetric	MACULAR	SPINE HEAD	19846	18456.8
AB2	I	AB2-LI-S3	Asymmetric	MACULAR	SPINE HEAD	21109.8	19632.1
AB2	I	AB2-LI-S3	Asymmetric	MACULAR	SPINE HEAD	21908	20374.4
AB2	I	AB2-LI-S3	Asymmetric	MACULAR	UNKNOWN	25430.2	23650.1
AB2	I	AB2-LI-S3	Asymmetric	MACULAR	PUT SPINE HEAD	25816.7	24009.6
AB2	I	AB2-LI-S3	Asymmetric	MACULAR	ASPINY SHAFT	26203.3	24369.1
AB2	I	AB2-LI-S3	Asymmetric	MACULAR	SPINE HEAD	28411.8	26422.9
AB2	I	AB2-LI-S3	Asymmetric	MACULAR	UNKNOWN	30939.6	28773.8
AB2	I	AB2-LI-S3	Asymmetric	MACULAR	SPINE HEAD	31553.5	29344.8
AB2	I	AB2-LI-S3	Asymmetric	MACULAR	ASPINY SHAFT	33119.4	30801.1
AB2	I	AB2-LI-S3	Asymmetric	MACULAR	ASPINY SHAFT	35138.4	32678.7
AB2	I	AB2-LI-S3	Asymmetric	MACULAR	SPINE HEAD	37429.6	34809.5
AB2	I	AB2-LI-S3	Asymmetric	MACULAR	PUT SPINE HEAD	38772.4	36058.4
AB2	I	AB2-LI-S3	Asymmetric	MACULAR	SPINE HEAD	38913.6	36189.6
AB2	I	AB2-LI-S3	Asymmetric	MACULAR	SPINE HEAD	41616.6	38703.4
AB2	I	AB2-LI-S3	Asymmetric	MACULAR	UNKNOWN	43266.9	40238.2
AB2	I	AB2-LI-S3	Asymmetric	MACULAR	PUT SPINE HEAD	44310.9	41209.1
AB2	I	AB2-LI-S3	Asymmetric	MACULAR	SPINY SHAFT	47382.2	44065.5
AB2	I	AB2-LI-S3	Symmetric	MACULAR	ASPINY SHAFT	35540.5	33052.7
AB2	I	AB2-LI-S3	Symmetric	PERFORATED	ASPINY SHAFT	36614.8	34051.8
AB2	I	AB2-LI-S3	Asymmetric	MACULAR	SPINE HEAD	47943.5	44587.4
AB2	I	AB2-LI-S3	Asymmetric	MACULAR	SPINE HEAD	48178.6	44806.1
AB2	I	AB2-LI-S3	Asymmetric	MACULAR	ASPINY SHAFT	49134.3	45694.9
AB2	I	AB2-LI-S3	Asymmetric	MACULAR	SPINE HEAD	53238	49511.3
AB2	I	AB2-LI-S3	Asymmetric	MACULAR	SPINE HEAD	53254.7	49526.9
AB2	I	AB2-LI-S3	Asymmetric	MACULAR	SPINE HEAD	54679.1	50851.6
AB2	I	AB2-LI-S3	Asymmetric	MACULAR	ASPINY SHAFT	56855.3	52875.4
AB2	I	AB2-LI-S3	Asymmetric	MACULAR	ASPINY SHAFT	58023.1	53961.4
AB2	I	AB2-LI-S3	Asymmetric	MACULAR	SPINE HEAD	58361.6	54276.3
AB2	I	AB2-LI-S3	Asymmetric	MACULAR	SPINE HEAD	58709.4	54599.8
AB2	I	AB2-LI-S3	Asymmetric	MACULAR	SPINE HEAD	59133.1	54993.7
AB2	I	AB2-LI-S3	Asymmetric	MACULAR	SPINY SHAFT	61786.9	57461.8
AB2	I	AB2-LI-S3	Asymmetric	MACULAR	SPINE HEAD	64509.5	59993.9
AB2	I	AB2-LI-S3	Asymmetric	MACULAR	SPINE HEAD	64600.1	60078.1
AB2	I	AB2-LI-S3	Asymmetric	MACULAR	SPINE HEAD	67392.4	62674.9
AB2	I	AB2-LI-S3	Asymmetric	MACULAR	SPINE HEAD	68237.5	63460.9
AB2	I	AB2-LI-S3	Asymmetric	MACULAR	SPINE HEAD	68647.9	63842.5
AB2	I	AB2-LI-S3	Asymmetric	MACULAR	ASPINY SHAFT	73175.5	68053.3
AB2	I	AB2-LI-S3	Asymmetric	MACULAR	UNKNOWN	74651.9	69426.2
AB2	I	AB2-LI-S3	Asymmetric	MACULAR	ASPINY SHAFT	74662.3	69435.9
AB2	I	AB2-LI-S3	Asymmetric	MACULAR	SPINY SHAFT	76429.9	71079.8
AB2	I	AB2-LI-S3	Asymmetric	MACULAR	ASPINY SHAFT	76947.8	71561.4
AB2	I	AB2-LI-S3	Symmetric	MACULAR	SPINY SHAFT	50152.3	46641.6
AB2	I	AB2-LI-S3	Asymmetric	MACULAR	ASPINY SHAFT	81499.8	75794.8
AB2	I	AB2-LI-S3	Asymmetric	MACULAR	SPINY SHAFT	81630.9	75916.7
AB2	I	AB2-LI-S3	Asymmetric	MACULAR	ASPINY SHAFT	86828.9	80750.8
AB2	I	AB2-LI-S3	Asymmetric	PERFORATED	SPINE HEAD	87095.3	80998.7
AB2	I	AB2-LI-S3	Asymmetric	MACULAR	SPINY SHAFT	87098.3	81001.4
AB2	I	AB2-LI-S3	Asymmetric	MACULAR	SPINE HEAD	87109.8	81012.1
AB2	I	AB2-LI-S3	Asymmetric	MACULAR	ASPINY SHAFT	87943.8	81787.7
AB2	I	AB2-LI-S3	Asymmetric	MACULAR	SPINE HEAD	87989.2	81830
AB2	I	AB2-LI-S3	Asymmetric	PERFORATED	SPINE HEAD	88411.3	82222.5
AB2	I	AB2-LI-S3	Asymmetric	MACULAR	SPINE HEAD	90858.3	84498.3
AB2	I	AB2-LI-S3	Asymmetric	MACULAR	ASPINY SHAFT	92353.7	85888.9
AB2	I	AB2-LI-S3	Asymmetric	PERFORATED	NECK	92839	86340.2
AB2	I	AB2-LI-S3	Asymmetric	MACULAR	PUT SPINE HEAD	93966.8	87389.2
AB2	I	AB2-LI-S3	Asymmetric	MACULAR	SPINE HEAD	94255	87657.2
AB2	I	AB2-LI-S3	Asymmetric	MACULAR	SPINE HEAD	94473.5	87860.3
AB2	I	AB2-LI-S3	Symmetric	MACULAR	ASPINY SHAFT	55793.3	51887.8
AB2	I	AB2-LI-S3	Asymmetric	MACULAR	SPINY SHAFT	95297.5	88626.7
AB2	I	AB2-LI-S3	Asymmetric	MACULAR	SPINY SHAFT	96609.7	89847.1
AB2	I	AB2-LI-S3	Asymmetric	MACULAR	SPINY SHAFT	97137	90337.4
AB2	I	AB2-LI-S3	Asymmetric	MACULAR	SPINE HEAD	98072.5	91207.4
AB2	I	AB2-LI-S3	Asymmetric	MACULAR	SPINY SHAFT	98852.2	91932.5
AB2	I	AB2-LI-S3	Asymmetric	MACULAR	ASPINY SHAFT	98959.8	92032.7
AB2	I	AB2-LI-S3	Asymmetric	MACULAR	ASPINY SHAFT	99079	92143.5
AB2	I	AB2-LI-S3	Asymmetric	MACULAR	ASPINY SHAFT	99906	92912.6
AB2	I	AB2-LI-S3	Asymmetric	MACULAR	PUT SPINE HEAD	99983.4	92984.6
AB2	I	AB2-LI-S3	Asymmetric	MACULAR	PUT SPINE HEAD	100200	93185.9
AB2	I	AB2-LI-S3	Asymmetric	MACULAR	ASPINY SHAFT	100466	93433.4
AB2	I	AB2-LI-S3	Asymmetric	PERFORATED	UNKNOWN	100818	93761
AB2	I	AB2-LI-S3	Asymmetric	MACULAR	ASPINY SHAFT	102281	95121.1
AB2	I	AB2-LI-S3	Asymmetric	MACULAR	SPINE HEAD	102387	95220.3
AB2	I	AB2-LI-S3	Asymmetric	MACULAR	ASPINY SHAFT	102787	95591.6
AB2	I	AB2-LI-S3	Asymmetric	MACULAR	SPINY SHAFT	102923	95718.5
AB2	I	AB2-LI-S3	Asymmetric	MACULAR	SPINY SHAFT	103341	96107.6
AB2	I	AB2-LI-S3	Asymmetric	MACULAR	ASPINY SHAFT	103548	96299.3
AB2	I	AB2-LI-S3	Asymmetric	MACULAR	SPINE HEAD	105276	97906.4
AB2	I	AB2-LI-S3	Asymmetric	PERFORATED	ASPINY SHAFT	105812	98405.5
AB2	I	AB2-LI-S3	Asymmetric	MACULAR	ASPINY SHAFT	106073	98647.9
AB2	I	AB2-LI-S3	Asymmetric	MACULAR	PUT SPINE HEAD	107524	99997.1
AB2	I	AB2-LI-S3	Asymmetric	MACULAR	SPINE HEAD	107951	100395
AB2	I	AB2-LI-S3	Symmetric	MACULAR	UNKNOWN	60674.7	56427.5
AB2	I	AB2-LI-S3	Asymmetric	MACULAR	PUT SPINE HEAD	111278	103488
AB2	I	AB2-LI-S3	Asymmetric	MACULAR	UNKNOWN	112048	104205
AB2	I	AB2-LI-S3	Asymmetric	MACULAR	SPINY SHAFT	112082	104236
AB2	I	AB2-LI-S3	Asymmetric	MACULAR	SPINY SHAFT	112466	104594
AB2	I	AB2-LI-S3	Asymmetric	MACULAR	UNKNOWN	112669	104782
AB2	I	AB2-LI-S3	Asymmetric	MACULAR	ASPINY SHAFT	113601	105649
AB2	I	AB2-LI-S3	Asymmetric	MACULAR	PUT SPINE HEAD	113832	105864
AB2	I	AB2-LI-S3	Asymmetric	MACULAR	SPINY SHAFT	113834	105866
AB2	I	AB2-LI-S3	Asymmetric	MACULAR	SPINE HEAD	113839	105870
AB2	I	AB2-LI-S3	Asymmetric	MACULAR	SPINE HEAD	113865	105895
AB2	I	AB2-LI-S3	Asymmetric	MACULAR	ASPINY SHAFT	114533	106515
AB2	I	AB2-LI-S3	Asymmetric	PERFORATED	SPINE HEAD	116034	107912
AB2	I	AB2-LI-S3	Asymmetric	MACULAR	ASPINY SHAFT	118075	109810
AB2	I	AB2-LI-S3	Asymmetric	MACULAR	ASPINY SHAFT	118434	110144
AB2	I	AB2-LI-S3	Asymmetric	MACULAR	PUT SPINE HEAD	120059	111655
AB2	I	AB2-LI-S3	Asymmetric	PERFORATED	PUT SPINE HEAD	120451	112019
AB2	I	AB2-LI-S3	Asymmetric	PERFORATED	SPINY SHAFT	120842	112383
AB2	I	AB2-LI-S3	Asymmetric	MACULAR	ASPINY SHAFT	120900	112437
AB2	I	AB2-LI-S3	Asymmetric	MACULAR	SPINE HEAD	122989	114379
AB2	I	AB2-LI-S3	Asymmetric	MACULAR	SPINY SHAFT	123466	114823
AB2	I	AB2-LI-S3	Asymmetric	MACULAR	ASPINY SHAFT	125632	116837
AB2	I	AB2-LI-S3	Asymmetric	MACULAR	ASPINY SHAFT	126479	117625
AB2	I	AB2-LI-S3	Asymmetric	MACULAR	ASPINY SHAFT	126893	118011
AB2	I	AB2-LI-S3	Asymmetric	MACULAR	ASPINY SHAFT	128147	119177
AB2	I	AB2-LI-S3	Asymmetric	MACULAR	SPINE HEAD	128477	119484
AB2	I	AB2-LI-S3	Asymmetric	MACULAR	SPINY SHAFT	129031	119999
AB2	I	AB2-LI-S3	Symmetric	FRAGMENTED	SPINY SHAFT	70463.5	65531
AB2	I	AB2-LI-S3	Asymmetric	MACULAR	ASPINY SHAFT	130121	121012
AB2	I	AB2-LI-S3	Asymmetric	MACULAR	ASPINY SHAFT	131620	122407
AB2	I	AB2-LI-S3	Asymmetric	MACULAR	SPINE HEAD	132028	122786
AB2	I	AB2-LI-S3	Asymmetric	MACULAR	ASPINY SHAFT	132715	123425
AB2	I	AB2-LI-S3	Asymmetric	MACULAR	ASPINY SHAFT	134308	124906
AB2	I	AB2-LI-S3	Asymmetric	MACULAR	SPINY SHAFT	135154	125694
AB2	I	AB2-LI-S3	Asymmetric	MACULAR	SPINY SHAFT	136545	126987
AB2	I	AB2-LI-S3	Symmetric	PERFORATED	ASPINY SHAFT	73336.7	68203.2
AB2	I	AB2-LI-S3	Asymmetric	MACULAR	PUT SPINE HEAD	139648	129873
AB2	I	AB2-LI-S3	Asymmetric	MACULAR	SPINY SHAFT	140677	130829
AB2	I	AB2-LI-S3	Asymmetric	MACULAR	ASPINY SHAFT	142023	132081
AB2	I	AB2-LI-S3	Asymmetric	PERFORATED	PUT SPINE HEAD	142816	132819
AB2	I	AB2-LI-S3	Asymmetric	MACULAR	SPINY SHAFT	143316	133284
AB2	I	AB2-LI-S3	Asymmetric	MACULAR	SPINE HEAD	145594	135402
AB2	I	AB2-LI-S3	Asymmetric	MACULAR	SPINE HEAD	145843	135634
AB2	I	AB2-LI-S3	Asymmetric	PERFORATED	SPINY SHAFT	147933	137578
AB2	I	AB2-LI-S3	Asymmetric	MACULAR	PUT SPINE HEAD	149520	139053
AB2	I	AB2-LI-S3	Asymmetric	MACULAR	SPINE HEAD	149847	139357
AB2	I	AB2-LI-S3	Asymmetric	PERFORATED	SPINE HEAD	152493	141818
AB2	I	AB2-LI-S3	Asymmetric	MACULAR	SPINY SHAFT	153244	142516
AB2	I	AB2-LI-S3	Asymmetric	MACULAR	SPINE HEAD	157224	146218
AB2	I	AB2-LI-S3	Asymmetric	PERFORATED	SPINE HEAD	159066	147931
AB2	I	AB2-LI-S3	Symmetric	PERFORATED	SPINY SHAFT	83163.5	77342
AB2	I	AB2-LI-S3	Asymmetric	MACULAR	SPINE HEAD	161295	150004
AB2	I	AB2-LI-S3	Asymmetric	MACULAR	SPINY SHAFT	162238	150881
AB2	I	AB2-LI-S3	Asymmetric	MACULAR	SPINY SHAFT	162408	151039
AB2	I	AB2-LI-S3	Asymmetric	MACULAR	SPINE HEAD	163670	152213
AB2	I	AB2-LI-S3	Asymmetric	MACULAR	SPINE HEAD	165955	154338
AB2	I	AB2-LI-S3	Asymmetric	MACULAR	SPINY SHAFT	166173	154541
AB2	I	AB2-LI-S3	Asymmetric	MACULAR	SPINY SHAFT	171737	159715
AB2	I	AB2-LI-S3	Asymmetric	MACULAR	SPINY SHAFT	176717	164347
AB2	I	AB2-LI-S3	Asymmetric	PERFORATED	SPINE HEAD	184362	171456
AB2	I	AB2-LI-S3	Asymmetric	PERFORATED	SPINE HEAD	184792	171857
AB2	I	AB2-LI-S3	Asymmetric	MACULAR	SPINE HEAD	189754	176471
AB2	I	AB2-LI-S3	Asymmetric	MACULAR	SPINE HEAD	195036	181383
AB2	I	AB2-LI-S3	Asymmetric	MACULAR	SPINE HEAD	195642	181947
AB2	I	AB2-LI-S3	Asymmetric	MACULAR	PUT SPINE HEAD	195695	181996
AB2	I	AB2-LI-S3	Asymmetric	MACULAR	ASPINY SHAFT	197181	183379
AB2	I	AB2-LI-S3	Asymmetric	MACULAR	UNKNOWN	198062	184198
AB2	I	AB2-LI-S3	Asymmetric	MACULAR	ASPINY SHAFT	201711	187591
AB2	I	AB2-LI-S3	Asymmetric	FRAGMENTED	SPINE HEAD	219471	204108
AB2	I	AB2-LI-S3	Asymmetric	MACULAR	SPINE HEAD	221342	205848
AB2	I	AB2-LI-S3	Asymmetric	MACULAR	SPINE HEAD	225396	209618
AB2	I	AB2-LI-S3	Asymmetric	PERFORATED	SPINE HEAD	227568	211638
AB2	I	AB2-LI-S3	Asymmetric	PERFORATED	SPINE HEAD	241968	225030
AB2	I	AB2-LI-S3	Asymmetric	PERFORATED	SPINE HEAD	260785	242530
AB2	I	AB2-LI-S3	Asymmetric	PERFORATED	SPINE HEAD	265805	247198
AB2	I	AB2-LI-S3	Asymmetric	MACULAR	SPINE HEAD	266395	247748
AB2	I	AB2-LI-S3	Asymmetric	MACULAR	PUT SPINE HEAD	272055	253011
AB2	I	AB2-LI-S3	Asymmetric	MACULAR	PUT SPINE HEAD	273265	254137
AB2	I	AB2-LI-S3	Asymmetric	MACULAR	SPINE HEAD	300143	279133
AB2	I	AB2-LI-S3	Asymmetric	PERFORATED	SPINE HEAD	368755	342942
AB2	I	AB2-LI-S3	Asymmetric	PERFORATED	SPINE HEAD	376187	349854
AB2	I	AB2-LI-S3	Asymmetric	PERFORATED	SPINE HEAD	386370	359324
AB2	I	AB2-LI-S3	Asymmetric	PERFORATED	SPINE HEAD	713269	663341
AB2	Vab	AB2-LVab-S1	Asymmetric	MACULAR	PUT SPINE HEAD	20392.2	18964.8
AB2	Vab	AB2-LVab-S1	Symmetric	MACULAR	NECK	12297.9	11437.1
AB2	Vab	AB2-LVab-S1	Asymmetric	MACULAR	NECK	24753.3	23020.6
AB2	Vab	AB2-LVab-S1	Asymmetric	MACULAR	SPINE HEAD	26833.1	24954.7
AB2	Vab	AB2-LVab-S1	Asymmetric	MACULAR	UNKNOWN	26978.6	25090.1
AB2	Vab	AB2-LVab-S1	Asymmetric	MACULAR	UNKNOWN	27362.1	25446.7
AB2	Vab	AB2-LVab-S1	Asymmetric	MACULAR	UNKNOWN	28768.7	26754.9
AB2	Vab	AB2-LVab-S1	Asymmetric	MACULAR	UNKNOWN	29526.1	27459.2
AB2	Vab	AB2-LVab-S1	Asymmetric	MACULAR	SPINY SHAFT	29690.7	27612.4
AB2	Vab	AB2-LVab-S1	Asymmetric	MACULAR	UNKNOWN	31587.6	29376.4
AB2	Vab	AB2-LVab-S1	Asymmetric	MACULAR	UNKNOWN	32290.3	30030
AB2	Vab	AB2-LVab-S1	Asymmetric	PERFORATED	SPINE HEAD	34060.1	31675.9
AB2	Vab	AB2-LVab-S1	Asymmetric	MACULAR	NECK	35576.6	33086.2
AB2	Vab	AB2-LVab-S1	Asymmetric	MACULAR	ASPINY SHAFT	38095.1	35428.5
AB2	Vab	AB2-LVab-S1	Asymmetric	MACULAR	SPINE HEAD	42151.6	39201
AB2	Vab	AB2-LVab-S1	Asymmetric	MACULAR	SPINE HEAD	43085.2	40069.2
AB2	Vab	AB2-LVab-S1	Asymmetric	MACULAR	SPINE HEAD	43387.4	40350.3
AB2	Vab	AB2-LVab-S1	Asymmetric	MACULAR	SPINE HEAD	44789	41653.8
AB2	Vab	AB2-LVab-S1	Asymmetric	MACULAR	SPINY SHAFT	46069.2	42844.3
AB2	Vab	AB2-LVab-S1	Asymmetric	MACULAR	UNKNOWN	47176	43873.7
AB2	Vab	AB2-LVab-S1	Asymmetric	MACULAR	PUT SPINE HEAD	47409.2	44090.6
AB2	Vab	AB2-LVab-S1	Asymmetric	MACULAR	SPINE HEAD	47442.4	44121.5
AB2	Vab	AB2-LVab-S1	Asymmetric	MACULAR	PUT SPINE HEAD	49879.4	46387.9
AB2	Vab	AB2-LVab-S1	Asymmetric	MACULAR	SPINE HEAD	50432	46901.8
AB2	Vab	AB2-LVab-S1	Asymmetric	MACULAR	SPINE HEAD	50651.3	47105.7
AB2	Vab	AB2-LVab-S1	Asymmetric	MACULAR	SPINE HEAD	50789.6	47234.4
AB2	Vab	AB2-LVab-S1	Asymmetric	MACULAR	SPINE HEAD	50975.9	47407.6
AB2	Vab	AB2-LVab-S1	Asymmetric	MACULAR	SPINE HEAD	52600.9	48918.8
AB2	Vab	AB2-LVab-S1	Asymmetric	MACULAR	UNKNOWN	52848	49148.6
AB2	Vab	AB2-LVab-S1	Asymmetric	MACULAR	SPINE HEAD	55515	51629
AB2	Vab	AB2-LVab-S1	Asymmetric	MACULAR	PUT SPINE HEAD	57632.8	53598.5
AB2	Vab	AB2-LVab-S1	Asymmetric	MACULAR	ASPINY SHAFT	58991.2	54861.8
AB2	Vab	AB2-LVab-S1	Asymmetric	MACULAR	SPINE HEAD	59759.4	55576.3
AB2	Vab	AB2-LVab-S1	Asymmetric	MACULAR	PUT SPINE HEAD	60654.4	56408.6
AB2	Vab	AB2-LVab-S1	Asymmetric	MACULAR	UNKNOWN	61007.6	56737
AB2	Vab	AB2-LVab-S1	Asymmetric	MACULAR	ASPINY SHAFT	62156.3	57805.4
AB2	Vab	AB2-LVab-S1	Asymmetric	MACULAR	SPINE HEAD	62621.9	58238.3
AB2	Vab	AB2-LVab-S1	Asymmetric	HORSESHOE	SPINY SHAFT	64170.3	59678.3
AB2	Vab	AB2-LVab-S1	Asymmetric	MACULAR	SPINE HEAD	66692.6	62024.1
AB2	Vab	AB2-LVab-S1	Asymmetric	MACULAR	UNKNOWN	68011	63250.2
AB2	Vab	AB2-LVab-S1	Asymmetric	MACULAR	SPINY SHAFT	69313.6	64461.6
AB2	Vab	AB2-LVab-S1	Asymmetric	MACULAR	ASPINY SHAFT	74012.9	68832
AB2	Vab	AB2-LVab-S1	Asymmetric	MACULAR	SPINE HEAD	76693.1	71324.6
AB2	Vab	AB2-LVab-S1	Asymmetric	MACULAR	SPINE HEAD	78727.6	73216.6
AB2	Vab	AB2-LVab-S1	Asymmetric	MACULAR	SPINY SHAFT	80175.7	74563.4
AB2	Vab	AB2-LVab-S1	Asymmetric	MACULAR	UNKNOWN	82968.7	77160.9
AB2	Vab	AB2-LVab-S1	Asymmetric	MACULAR	SPINE HEAD	83219	77393.7
AB2	Vab	AB2-LVab-S1	Asymmetric	MACULAR	SPINE HEAD	85282.2	79312.4
AB2	Vab	AB2-LVab-S1	Asymmetric	PERFORATED	SPINE HEAD	85916.3	79902.1
AB2	Vab	AB2-LVab-S1	Asymmetric	MACULAR	SPINE HEAD	86423.8	80374.1
AB2	Vab	AB2-LVab-S1	Asymmetric	MACULAR	SPINY SHAFT	87577	81446.6
AB2	Vab	AB2-LVab-S1	Asymmetric	MACULAR	SPINE HEAD	88755.9	82543
AB2	Vab	AB2-LVab-S1	Asymmetric	MACULAR	SPINY SHAFT	89749.1	83466.7
AB2	Vab	AB2-LVab-S1	Asymmetric	MACULAR	UNKNOWN	91035.6	84663.1
AB2	Vab	AB2-LVab-S1	Asymmetric	MACULAR	PUT SPINE HEAD	97302.9	90491.7
AB2	Vab	AB2-LVab-S1	Asymmetric	MACULAR	SPINE HEAD	98737.2	91825.6
AB2	Vab	AB2-LVab-S1	Asymmetric	MACULAR	PUT SPINE HEAD	108125	100556
AB2	Vab	AB2-LVab-S1	Asymmetric	MACULAR	PUT SPINE HEAD	109456	101795
AB2	Vab	AB2-LVab-S1	Asymmetric	MACULAR	SPINE HEAD	110430	102699
AB2	Vab	AB2-LVab-S1	Asymmetric	MACULAR	UNKNOWN	111557	103748
AB2	Vab	AB2-LVab-S1	Asymmetric	MACULAR	ASPINY SHAFT	112796	104900
AB2	Vab	AB2-LVab-S1	Asymmetric	MACULAR	SPINY SHAFT	113833	105865
AB2	Vab	AB2-LVab-S1	Asymmetric	MACULAR	SPINE HEAD	115844	107735
AB2	Vab	AB2-LVab-S1	Asymmetric	MACULAR	SPINY SHAFT	117805	109559
AB2	Vab	AB2-LVab-S1	Asymmetric	MACULAR	PUT SPINE HEAD	122110	113563
AB2	Vab	AB2-LVab-S1	Asymmetric	MACULAR	PUT SPINE HEAD	126508	117653
AB2	Vab	AB2-LVab-S1	Asymmetric	MACULAR	SPINE HEAD	126596	117734
AB2	Vab	AB2-LVab-S1	Asymmetric	MACULAR	PUT SPINE HEAD	127006	118115
AB2	Vab	AB2-LVab-S1	Asymmetric	MACULAR	SPINY SHAFT	129688	120609
AB2	Vab	AB2-LVab-S1	Asymmetric	MACULAR	SPINE HEAD	129779	120694
AB2	Vab	AB2-LVab-S1	Asymmetric	MACULAR	SPINE HEAD	130547	121409
AB2	Vab	AB2-LVab-S1	Asymmetric	MACULAR	SPINE HEAD	132269	123011
AB2	Vab	AB2-LVab-S1	Asymmetric	MACULAR	SPINY SHAFT	139012	129281
AB2	Vab	AB2-LVab-S1	Asymmetric	MACULAR	ASPINY SHAFT	139158	129417
AB2	Vab	AB2-LVab-S1	Asymmetric	MACULAR	SPINY SHAFT	141154	131273
AB2	Vab	AB2-LVab-S1	Asymmetric	MACULAR	ASPINY SHAFT	143894	133822
AB2	Vab	AB2-LVab-S1	Asymmetric	MACULAR	PUT SPINE HEAD	145069	134914
AB2	Vab	AB2-LVab-S1	Asymmetric	MACULAR	ASPINY SHAFT	145232	135066
AB2	Vab	AB2-LVab-S1	Symmetric	PERFORATED	ASPINY SHAFT	75535.6	70248.1
AB2	Vab	AB2-LVab-S1	Symmetric	PERFORATED	SPINY SHAFT	75974.4	70656.2
AB2	Vab	AB2-LVab-S1	Asymmetric	MACULAR	UNKNOWN	148292	137912
AB2	Vab	AB2-LVab-S1	Asymmetric	MACULAR	ASPINY SHAFT	150072	139567
AB2	Vab	AB2-LVab-S1	Asymmetric	MACULAR	SPINY SHAFT	151892	141259
AB2	Vab	AB2-LVab-S1	Asymmetric	MACULAR	UNKNOWN	152119	141471
AB2	Vab	AB2-LVab-S1	Asymmetric	MACULAR	ASPINY SHAFT	153151	142431
AB2	Vab	AB2-LVab-S1	Asymmetric	MACULAR	SPINY SHAFT	153659	142903
AB2	Vab	AB2-LVab-S1	Asymmetric	MACULAR	PUT SPINE HEAD	155150	144289
AB2	Vab	AB2-LVab-S1	Asymmetric	MACULAR	SPINY SHAFT	155878	144967
AB2	Vab	AB2-LVab-S1	Asymmetric	PERFORATED	SPINE HEAD	157016	146025
AB2	Vab	AB2-LVab-S1	Asymmetric	MACULAR	SPINY SHAFT	157970	146912
AB2	Vab	AB2-LVab-S1	Asymmetric	MACULAR	ASPINY SHAFT	158884	147762
AB2	Vab	AB2-LVab-S1	Asymmetric	MACULAR	NECK	159600	148428
AB2	Vab	AB2-LVab-S1	Asymmetric	MACULAR	PUT SPINE HEAD	161777	150453
AB2	Vab	AB2-LVab-S1	Asymmetric	MACULAR	ASPINY SHAFT	164371	152865
AB2	Vab	AB2-LVab-S1	Asymmetric	MACULAR	SPINY SHAFT	165886	154274
AB2	Vab	AB2-LVab-S1	Asymmetric	PERFORATED	ASPINY SHAFT	167487	155763
AB2	Vab	AB2-LVab-S1	Asymmetric	MACULAR	SPINE HEAD	169498	157633
AB2	Vab	AB2-LVab-S1	Asymmetric	MACULAR	PUT SPINE HEAD	170485	158551
AB2	Vab	AB2-LVab-S1	Asymmetric	MACULAR	SPINE HEAD	172007	159967
AB2	Vab	AB2-LVab-S1	Asymmetric	MACULAR	ASPINY SHAFT	174036	161854
AB2	Vab	AB2-LVab-S1	Asymmetric	MACULAR	SPINY SHAFT	175726	163426
AB2	Vab	AB2-LVab-S1	Asymmetric	MACULAR	SPINE HEAD	178050	165586
AB2	Vab	AB2-LVab-S1	Asymmetric	PERFORATED	SPINE HEAD	184087	171201
AB2	Vab	AB2-LVab-S1	Asymmetric	PERFORATED	PUT SPINE HEAD	186943	173857
AB2	Vab	AB2-LVab-S1	Asymmetric	MACULAR	SPINY SHAFT	188059	174895
AB2	Vab	AB2-LVab-S1	Asymmetric	MACULAR	PUT SPINE HEAD	189254	176006
AB2	Vab	AB2-LVab-S1	Asymmetric	MACULAR	SPINY SHAFT	190076	176771
AB2	Vab	AB2-LVab-S1	Asymmetric	MACULAR	ASPINY SHAFT	191259	177871
AB2	Vab	AB2-LVab-S1	Asymmetric	PERFORATED	SPINY SHAFT	193549	180000
AB2	Vab	AB2-LVab-S1	Asymmetric	MACULAR	SPINY SHAFT	195088	181431
AB2	Vab	AB2-LVab-S1	Asymmetric	MACULAR	SPINE HEAD	196506	182751
AB2	Vab	AB2-LVab-S1	Asymmetric	MACULAR	SPINY SHAFT	197020	183229
AB2	Vab	AB2-LVab-S1	Asymmetric	PERFORATED	SPINE HEAD	202287	188126
AB2	Vab	AB2-LVab-S1	Asymmetric	MACULAR	SPINY SHAFT	203138	188919
AB2	Vab	AB2-LVab-S1	Asymmetric	PERFORATED	ASPINY SHAFT	205365	190989
AB2	Vab	AB2-LVab-S1	Asymmetric	MACULAR	SPINE HEAD	215217	200152
AB2	Vab	AB2-LVab-S1	Asymmetric	PERFORATED	SPINE HEAD	215349	200275
AB2	Vab	AB2-LVab-S1	Asymmetric	PERFORATED	SPINE HEAD	224421	208711
AB2	Vab	AB2-LVab-S1	Asymmetric	MACULAR	SPINY SHAFT	224931	209185
AB2	Vab	AB2-LVab-S1	Asymmetric	MACULAR	SPINY SHAFT	224968	209220
AB2	Vab	AB2-LVab-S1	Asymmetric	MACULAR	SPINY SHAFT	226138	210309
AB2	Vab	AB2-LVab-S1	Asymmetric	PERFORATED	SPINY SHAFT	227701	211762
AB2	Vab	AB2-LVab-S1	Asymmetric	MACULAR	PUT SPINE HEAD	228192	212219
AB2	Vab	AB2-LVab-S1	Asymmetric	MACULAR	SPINE HEAD	229410	213351
AB2	Vab	AB2-LVab-S1	Asymmetric	PERFORATED	UNKNOWN	240816	223959
AB2	Vab	AB2-LVab-S1	Asymmetric	MACULAR	SPINY SHAFT	241714	224794
AB2	Vab	AB2-LVab-S1	Asymmetric	PERFORATED	SPINY SHAFT	249647	232172
AB2	Vab	AB2-LVab-S1	Asymmetric	PERFORATED	ASPINY SHAFT	250749	233196
AB2	Vab	AB2-LVab-S1	Asymmetric	PERFORATED	SPINE HEAD	251184	233601
AB2	Vab	AB2-LVab-S1	Asymmetric	MACULAR	SPINE HEAD	252560	234880
AB2	Vab	AB2-LVab-S1	Asymmetric	MACULAR	PUT SPINE HEAD	259147	241007
AB2	Vab	AB2-LVab-S1	Asymmetric	PERFORATED	SPINY SHAFT	273808	254642
AB2	Vab	AB2-LVab-S1	Asymmetric	MACULAR	PUT SPINE HEAD	274280	255080
AB2	Vab	AB2-LVab-S1	Asymmetric	FRAGMENTED	SPINE HEAD	277186	257783
AB2	Vab	AB2-LVab-S1	Asymmetric	PERFORATED	SPINE HEAD	277929	258474
AB2	Vab	AB2-LVab-S1	Asymmetric	PERFORATED	SPINE HEAD	286620	266557
AB2	Vab	AB2-LVab-S1	Asymmetric	PERFORATED	UNKNOWN	300588	279547
AB2	Vab	AB2-LVab-S1	Asymmetric	MACULAR	ASPINY SHAFT	305838	284430
AB2	Vab	AB2-LVab-S1	Asymmetric	PERFORATED	SPINE HEAD	307776	286232
AB2	Vab	AB2-LVab-S1	Asymmetric	MACULAR	SPINE HEAD	312751	290859
AB2	Vab	AB2-LVab-S1	Asymmetric	PERFORATED	PUT SPINE HEAD	321240	298754
AB2	Vab	AB2-LVab-S1	Asymmetric	PERFORATED	SPINE HEAD	334652	311226
AB2	Vab	AB2-LVab-S1	Asymmetric	PERFORATED	ASPINY SHAFT	343121	319102
AB2	Vab	AB2-LVab-S1	Asymmetric	PERFORATED	PUT SPINE HEAD	348164	323792
AB2	Vab	AB2-LVab-S1	Asymmetric	MACULAR	SPINE HEAD	357460	332438
AB2	Vab	AB2-LVab-S1	Asymmetric	HORSESHOE	SPINE HEAD	360731	335480
AB2	Vab	AB2-LVab-S1	Asymmetric	FRAGMENTED	UNKNOWN	374370	348164
AB2	Vab	AB2-LVab-S1	Asymmetric	PERFORATED	SPINE HEAD	376346	350002
AB2	Vab	AB2-LVab-S1	Asymmetric	PERFORATED	SPINE HEAD	436290	405749
AB2	Vab	AB2-LVab-S2	Asymmetric	MACULAR	ASPINY SHAFT	16289.9	15149.6
AB2	Vab	AB2-LVab-S2	Symmetric	MACULAR	SPINY SHAFT	12202	11347.9
AB2	Vab	AB2-LVab-S2	Asymmetric	MACULAR	UNKNOWN	24352.6	22647.9
AB2	Vab	AB2-LVab-S2	Asymmetric	MACULAR	PUT SPINE HEAD	26659.7	24793.5
AB2	Vab	AB2-LVab-S2	Asymmetric	MACULAR	ASPINY SHAFT	27853.5	25903.8
AB2	Vab	AB2-LVab-S2	Asymmetric	MACULAR	ASPINY SHAFT	30525.9	28389.1
AB2	Vab	AB2-LVab-S2	Symmetric	MACULAR	UNKNOWN	25542.7	23754.7
AB2	Vab	AB2-LVab-S2	Asymmetric	MACULAR	UNKNOWN	33070.4	30755.5
AB2	Vab	AB2-LVab-S2	Asymmetric	MACULAR	UNKNOWN	33893.6	31521.1
AB2	Vab	AB2-LVab-S2	Asymmetric	MACULAR	SPINY SHAFT	34546.1	32127.9
AB2	Vab	AB2-LVab-S2	Asymmetric	MACULAR	ASPINY SHAFT	38998.3	36268.4
AB2	Vab	AB2-LVab-S2	Asymmetric	MACULAR	PUT SPINE HEAD	39690	36911.7
AB2	Vab	AB2-LVab-S2	Asymmetric	MACULAR	UNKNOWN	40736.8	37885.2
AB2	Vab	AB2-LVab-S2	Asymmetric	MACULAR	SPINE HEAD	40804.1	37947.8
AB2	Vab	AB2-LVab-S2	Asymmetric	MACULAR	ASPINY SHAFT	42613	39630.1
AB2	Vab	AB2-LVab-S2	Asymmetric	MACULAR	UNKNOWN	46855.4	43575.5
AB2	Vab	AB2-LVab-S2	Asymmetric	MACULAR	UNKNOWN	47693.5	44354.9
AB2	Vab	AB2-LVab-S2	Asymmetric	MACULAR	PUT SPINE HEAD	48361.9	44976.6
AB2	Vab	AB2-LVab-S2	Asymmetric	MACULAR	ASPINY SHAFT	48527.8	45130.8
AB2	Vab	AB2-LVab-S2	Asymmetric	MACULAR	UNKNOWN	52100.7	48453.6
AB2	Vab	AB2-LVab-S2	Asymmetric	MACULAR	NECK	54060.2	50276
AB2	Vab	AB2-LVab-S2	Asymmetric	PERFORATED	SPINY SHAFT	54719.1	50888.8
AB2	Vab	AB2-LVab-S2	Asymmetric	MACULAR	ASPINY SHAFT	61224	56938.3
AB2	Vab	AB2-LVab-S2	Asymmetric	MACULAR	PUT SPINE HEAD	63717.9	59257.7
AB2	Vab	AB2-LVab-S2	Asymmetric	MACULAR	SPINE HEAD	65832.4	61224.2
AB2	Vab	AB2-LVab-S2	Asymmetric	MACULAR	PUT SPINE HEAD	66649.4	61984
AB2	Vab	AB2-LVab-S2	Asymmetric	MACULAR	PUT SPINE HEAD	68179.9	63407.3
AB2	Vab	AB2-LVab-S2	Asymmetric	MACULAR	UNKNOWN	68317.4	63535.2
AB2	Vab	AB2-LVab-S2	Asymmetric	MACULAR	PUT SPINE HEAD	70290.9	65370.5
AB2	Vab	AB2-LVab-S2	Asymmetric	MACULAR	SPINE HEAD	71550.5	66541.9
AB2	Vab	AB2-LVab-S2	Asymmetric	MACULAR	SPINE HEAD	73886	68714
AB2	Vab	AB2-LVab-S2	Asymmetric	MACULAR	SPINE HEAD	74077.4	68892
AB2	Vab	AB2-LVab-S2	Asymmetric	MACULAR	NECK	74504.9	69289.5
AB2	Vab	AB2-LVab-S2	Asymmetric	MACULAR	ASPINY SHAFT	77332.8	71919.5
AB2	Vab	AB2-LVab-S2	Asymmetric	MACULAR	UNKNOWN	80251.4	74633.8
AB2	Vab	AB2-LVab-S2	Asymmetric	MACULAR	ASPINY SHAFT	80649.1	75003.6
AB2	Vab	AB2-LVab-S2	Asymmetric	MACULAR	SPINE HEAD	84117.3	78229.1
AB2	Vab	AB2-LVab-S2	Asymmetric	MACULAR	SPINE HEAD	86156.5	80125.6
AB2	Vab	AB2-LVab-S2	Asymmetric	MACULAR	ASPINY SHAFT	87569.2	81439.4
AB2	Vab	AB2-LVab-S2	Asymmetric	MACULAR	SPINE HEAD	88240.3	82063.5
AB2	Vab	AB2-LVab-S2	Asymmetric	MACULAR	SPINE HEAD	89057.7	82823.6
AB2	Vab	AB2-LVab-S2	Asymmetric	MACULAR	ASPINY SHAFT	92826.4	86328.5
AB2	Vab	AB2-LVab-S2	Asymmetric	MACULAR	SPINY SHAFT	94746.8	88114.5
AB2	Vab	AB2-LVab-S2	Asymmetric	PERFORATED	ASPINY SHAFT	95537.3	88849.7
AB2	Vab	AB2-LVab-S2	Asymmetric	MACULAR	SPINE HEAD	96079.8	89354.2
AB2	Vab	AB2-LVab-S2	Asymmetric	MACULAR	SPINY SHAFT	96980.5	90191.9
AB2	Vab	AB2-LVab-S2	Asymmetric	MACULAR	PUT SPINE HEAD	97369.3	90553.4
AB2	Vab	AB2-LVab-S2	Symmetric	MACULAR	SPINY SHAFT	56024.3	52102.6
AB2	Vab	AB2-LVab-S2	Asymmetric	MACULAR	SPINY SHAFT	103439	96198.3
AB2	Vab	AB2-LVab-S2	Asymmetric	MACULAR	PUT SPINE HEAD	107733	100192
AB2	Vab	AB2-LVab-S2	Asymmetric	MACULAR	ASPINY SHAFT	109030	101398
AB2	Vab	AB2-LVab-S2	Asymmetric	MACULAR	SPINY SHAFT	109862	102172
AB2	Vab	AB2-LVab-S2	Asymmetric	MACULAR	SPINE HEAD	110012	102311
AB2	Vab	AB2-LVab-S2	Asymmetric	MACULAR	ASPINY SHAFT	112153	104303
AB2	Vab	AB2-LVab-S2	Asymmetric	MACULAR	UNKNOWN	113755	105792
AB2	Vab	AB2-LVab-S2	Asymmetric	MACULAR	SPINY SHAFT	114620	106597
AB2	Vab	AB2-LVab-S2	Asymmetric	MACULAR	SPINY SHAFT	117829	109581
AB2	Vab	AB2-LVab-S2	Asymmetric	MACULAR	ASPINY SHAFT	118024	109762
AB2	Vab	AB2-LVab-S2	Asymmetric	MACULAR	SPINY SHAFT	119675	111297
AB2	Vab	AB2-LVab-S2	Asymmetric	MACULAR	SPINE HEAD	119903	111510
AB2	Vab	AB2-LVab-S2	Asymmetric	MACULAR	PUT SPINE HEAD	122854	114254
AB2	Vab	AB2-LVab-S2	Asymmetric	MACULAR	UNKNOWN	124205	115511
AB2	Vab	AB2-LVab-S2	Asymmetric	MACULAR	SPINY SHAFT	124231	115535
AB2	Vab	AB2-LVab-S2	Asymmetric	MACULAR	SPINY SHAFT	125483	116699
AB2	Vab	AB2-LVab-S2	Asymmetric	MACULAR	ASPINY SHAFT	127762	118819
AB2	Vab	AB2-LVab-S2	Asymmetric	MACULAR	ASPINY SHAFT	129876	120785
AB2	Vab	AB2-LVab-S2	Asymmetric	MACULAR	ASPINY SHAFT	130003	120903
AB2	Vab	AB2-LVab-S2	Asymmetric	MACULAR	ASPINY SHAFT	130303	121182
AB2	Vab	AB2-LVab-S2	Asymmetric	MACULAR	ASPINY SHAFT	131353	122159
AB2	Vab	AB2-LVab-S2	Asymmetric	MACULAR	SPINY SHAFT	131511	122305
AB2	Vab	AB2-LVab-S2	Asymmetric	PERFORATED	UNKNOWN	132045	122802
AB2	Vab	AB2-LVab-S2	Symmetric	PERFORATED	SPINE HEAD	71677.9	66660.4
AB2	Vab	AB2-LVab-S2	Asymmetric	MACULAR	PUT SPINE HEAD	134235	124839
AB2	Vab	AB2-LVab-S2	Asymmetric	MACULAR	ASPINY SHAFT	134906	125463
AB2	Vab	AB2-LVab-S2	Asymmetric	MACULAR	ASPINY SHAFT	137175	127573
AB2	Vab	AB2-LVab-S2	Asymmetric	MACULAR	SPINY SHAFT	138630	128926
AB2	Vab	AB2-LVab-S2	Asymmetric	MACULAR	SPINY SHAFT	140037	130235
AB2	Vab	AB2-LVab-S2	Asymmetric	MACULAR	PUT SPINE HEAD	141963	132026
[truncated: 7,120 more rows]

## Sheet: RAW DATA DENSITIES
CASE	LAYER	STACK	No. AS	No. SS	No. ALL	CF INCLUDED VOLUME (nm3)	CORRECTED INCLUSION VOLUME (µm3)	AS/VOL	SS/VOL	ALL/VOL
AB2	I	AB2-LI-S1	153	11	164	389236301000	345.988	0.442212	0.031793	0.474005
AB2	I	AB2-LI-S2	110	11	121	337322585500	273.606	0.402038	0.0402038	0.442242
AB2	I	AB2-LI-S3	159	9	168	347255000000	297.096	0.535181	0.0302932	0.565474
AB2	II-IS	AB2-LII-IS-S1	142	12	154	371455265500	405.712	0.350002	0.0295777	0.37958
AB2	II-IS	AB2-LII-IS-S2	153	12	165	390680191500	422.369	0.362243	0.0284112	0.390654
AB2	II-IS	AB2-LII-IS-S3	128	13	141	360299453000	382.318	0.3348	0.0340031	0.368803
AB2	II-NI	AB2-LII-NI-S1	154	11	165	342239249000	360.112	0.427645	0.0305461	0.458191
AB2	II-NI	AB2-LII-NI-S2	127	4	131	328719000000	339.676	0.373885	0.0117759	0.385661
AB2	II-NI	AB2-LII-NI-S3	146	11	157	317217000000	329.906	0.442551	0.0333429	0.475894
AB2	III	AB2-LIII-S1	134	5	139	370642000000	403.588	0.332022	0.0123889	0.344411
AB2	III	AB2-LIII-S2	98	7	105	292067000000	315.757	0.310365	0.022169	0.332534
AB2	III	AB2-LIII-S3	153	9	162	332307000000	348.553	0.438957	0.025821	0.464779
AB2	Vab	AB2-LVab-S1	146	3	149	360822000000	394.098	0.370466	0.00761232	0.378079
AB2	Vab	AB2-LVab-S2	140	7	147	344457000000	372.396	0.375944	0.0187972	0.394741
AB2	Vab	AB2-LVab-S3	132	8	140	377823000000	400.912	0.329249	0.0199545	0.349204
AB2	Vc	AB2-LVc-S1	181	8	189	342639522500	373.096	0.485129	0.0214422	0.506572
AB2	Vc	AB2-LVc-S2	150	10	160	356404821500	384.125	0.390498	0.0260332	0.416531
AB2	Vc	AB2-LVc-S3	144	5	149	357253226000	385.04	0.373988	0.0129857	0.386973
AB2	VI	AB2-LVI-S1	130	3	133	380801866500	400.265	0.324785	0.00749503	0.33228
AB2	VI	AB2-LVI-S2	137	6	143	344457000000	365.507	0.374822	0.0164155	0.391237
AB2	VI	AB2-LVI-S3	141	3	144	349753910500	373.071	0.377944	0.00804137	0.385986
AB7	I	AB7-LI-S1	145	9	154	378863655000	357.816	0.405237	0.0251526	0.430389
AB7	I	AB7-LI-S2	137	6	143	345746000000	315.013	0.434903	0.0190468	0.453949
AB7	I	AB7-LI-S3	141	8	149	392654000000	344.663	0.409095	0.0232111	0.432306
AB7	II-IS	AB7-LII-IS-S1	115	8	123	321812976000	349.346	0.329187	0.0228999	0.352087
AB7	II-IS	AB7-LII-IS-S2	164	8	172	340276806500	365.609	0.448567	0.0218813	0.470449
AB7	II-IS	AB7-LII-IS-S3	148	14	162	311524219000	341.292	0.433646	0.0410206	0.474667
AB7	II-NI	AB7-LII-NI-S1	125	2	127	361982000000	367.613	0.340032	0.00544051	0.345472
AB7	II-NI	AB7-LII-NI-S2	194	11	205	359869000000	373.064	0.520018	0.0294855	0.549503
AB7	II-NI	AB7-LII-NI-S3	164	13	177	361065840500	395.568	0.414594	0.0328642	0.447458
AB7	III	AB7-LIII-S1	113	4	117	319471000000	344.319	0.328184	0.0116171	0.339801
AB7	III	AB7-LIII-S2	165	8	173	347317000000	365.841	0.451016	0.0218674	0.472884
AB7	III	AB7-LIII-S3	137	9	146	331881669500	354.007	0.386998	0.0254232	0.412421
AB7	Vab	AB7-LVab-S1	114	5	119	351683878000	381.772	0.298607	0.0130968	0.311704
AB7	Vab	AB7-LVab-S2	150	4	154	346392102000	372.179	0.403032	0.0107475	0.413779
AB7	Vab	AB7-LVab-S3	149	8	157	361065840500	395.568	0.376674	0.0202241	0.396898
AB7	Vc	AB7-LVc-S1	152	10	162	328742515000	354.311	0.429001	0.0282238	0.457225
AB7	Vc	AB7-LVc-S2	155	11	166	347468182500	380.671	0.407176	0.0288964	0.436072
AB7	Vc	AB7-LVc-S3	103	10	113	286711388500	309.011	0.333321	0.0323613	0.365683
AB7	VI	AB7-LVI-S1	110	6	116	360619176000	386.263	0.28478	0.0155334	0.300313
AB7	VI	AB7-LVI-S2	143	2	145	383986908500	417.266	0.342707	0.00479311	0.3475
AB7	VI	AB7-LVI-S3	108	9	117	385276150500	412.674	0.261708	0.021809	0.283517
M16	I	M16-LI-S1	109	7	116	342211000000	304.188	0.358332	0.0230121	0.381344
M16	I	M16-LI-S2	153	10	163	360003023500	320.003	0.478121	0.0312497	0.509371
M16	I	M16-LI-S3	157	9	166	372004998000	314.138	0.499781	0.0286499	0.528431
M16	II-IS	M16-LII-IS-S1	128	10	138	340515000000	306.464	0.417668	0.0326303	0.450298
M16	II-IS	M16-LII-IS-S2	132	6	138	367038429500	346.647	0.38079	0.0173087	0.398099
M16	II-IS	M16-LII-IS-S3	140	16	156	337907777500	356.68	0.392508	0.0448581	0.437366
M16	II-NI	M16-LII-NI-S1	146	20	166	380213287000	384.438	0.379775	0.052024	0.431799
M16	II-NI	M16-LII-NI-S2	113	13	126	277755780500	296.273	0.381405	0.0438785	0.425284
M16	II-NI	M16-LII-NI-S3	118	12	130	289410000000	286.194	0.412307	0.0419296	0.454237
M16	III	M16-LIII-S1	93	12	105	340162945500	370.4	0.25108	0.0323974	0.283478
M16	III	M16-LIII-S2	159	13	172	355622447500	375.379	0.423572	0.0346316	0.458203
M16	III	M16-LIII-S3	159	7	166	323624657500	345.2	0.460603	0.0202781	0.480881
M16	Vab	M16-LVab-S1	99	5	104	334770763000	347.79	0.284655	0.0143765	0.299031
M16	Vab	M16-LVab-S2	84	3	87	305508000000	318.407	0.263813	0.0094219	0.273235
M16	Vab	M16-LVab-S3	130	7	137	348109000000	368.996	0.352308	0.0189704	0.371278
M16	Vc	M16-LVc-S1	111	13	124	361639326000	373.7	0.29703	0.0347873	0.331817
M16	Vc	M16-LVc-S2	83	6	89	362690580500	367.929	0.225587	0.0163075	0.241894
M16	Vc	M16-LVc-S3	173	13	186	374630964500	387.119	0.446891	0.0335814	0.480473
M16	VI	M16-LVI-S1	132	8	140	362338709500	385.287	0.342602	0.0207638	0.363366
M16	VI	M16-LVI-S2	120	8	128	346041335500	362.19	0.331318	0.0220879	0.353406
M16	VI	M16-LVI-S3	155	9	164	326140168500	355.13	0.436459	0.0253428	0.461802

## Sheet: SIZE
LAYER	STACK	TYPE	mean SAS AREA (nm2)	DESVEST	SE SAS AREA (nm2)	No. SYNAPSES
I	AB2-LI-S1	Asymmetric	99901.2	50038.5	4045.37	153
		Symmetric	40726.7	28148.4	8487.05	11
	AB2-LI-S2	Asymmetric	113271	75322.5	7181.72	110
		Symmetric	46496.7	41068.5	12382.6	11
	AB2-LI-S3	Asymmetric	122286	82928.8	6576.68	159
		Symmetric	52673.7	23107.1	7702.37	9
	AB7-LI-S1	Asymmetric	111898	73438.8	6098.76	145
		Symmetric	52839	12084.3	4028.11	9
	AB7-LI-S2	Asymmetric	94767.4	70455.7	6019.44	137
		Symmetric	53589.3	17378.2	7094.62	6
	AB7-LI-S3	Asymmetric	95634.1	63280.5	5329.18	141
		Symmetric	60873.5	52538.7	18575.2	8
	M16-LI-S1	Asymmetric	117624	86626.2	8297.28	109
		Symmetric	57760.9	55938.6	21142.8	7
	M16-LI-S2	Asymmetric	93205.5	68416.7	5531.16	153
		Symmetric	51643.4	26680.9	8437.25	10
	M16-LI-S3	Asymmetric	104571	67600.9	5395.14	157
		Symmetric	63699	44367.9	14789.3	9
II-IS	AB2-LII-IS-S1	Asymmetric	144992	83254.3	6986.55	142
		Symmetric	67220.4	27355.7	7896.92	12
	AB2-LII-IS-S2	Asymmetric	132487	85614.2	6921.5	153
		Symmetric	88005.8	55499.2	16021.2	12
	AB2-LII-IS-S3	Asymmetric	145512	75081.8	6636.35	128
		Symmetric	82360.6	57177.2	15858.1	13
	AB7-LII-IS-S1	Asymmetric	103200	71982.4	6712.39	115
		Symmetric	60136.5	22336	7896.97	8
	AB7-LII-IS-S2	Asymmetric	95470.1	65984.2	5152.5	164
		Symmetric	49570.6	19594.1	6927.57	8
	AB7-LII-IS-S3	Asymmetric	105915	64619.4	5311.68	148
		Symmetric	51408.7	27094.2	7241.22	14
	M16-LII-IS-S1	Asymmetric	117786	78731.3	6958.93	128
		Symmetric	87997.3	51778	16373.6	10
	M16-LII-IS-S2	Asymmetric	113270	81969.6	7134.54	132
		Symmetric	53266.6	13576.9	5542.74	6
	M16-LII-IS-S3	Asymmetric	103998	88258.8	7459.23	140
		Symmetric	67463.9	29673.6	7418.39	16
II-NI	AB2-LII-NI-S1	Asymmetric	122109	72926	5876.54	154
		Symmetric	69447.9	29375.6	8857.08	11
	AB2-LII-NI-S2	Asymmetric	138518	79457.8	7050.74	127
		Symmetric	101430	45087	22543.5	4
	AB2-LII-NI-S3	Asymmetric	111654	63984.2	5295.37	146
		Symmetric	61417.3	36249.1	10929.5	11
	AB7-LII-NI-S1	Asymmetric	120441	75895.7	6788.32	125
		Symmetric	84449.5	72467.2	51242.1	2
	AB7-LII-NI-S2	Asymmetric	93130	60373.9	4334.59	194
		Symmetric	47455.8	15867.4	4784.19	11
	AB7-LII-NI-S3	Asymmetric	98798.5	59788	4668.66	164
		Symmetric	47651.8	18563.6	5148.61	13
	M16-LII-NI-S1	Asymmetric	135566	89215	7383.48	146
		Symmetric	90339.6	62589.3	13995.4	20
	M16-LII-NI-S2	Asymmetric	108734	62607.2	5889.59	113
		Symmetric	81981.3	30751.2	8528.85	13
	M16-LII-NI-S3	Asymmetric	137998	92362.7	8502.67	118
		Symmetric	74100.1	28260.8	8158.19	12
III	AB2-LIII-S1	Asymmetric	158732	108251	9351.46	134
		Symmetric	120038	81707.5	36540.7	5
	AB2-LIII-S2	Asymmetric	127904	86597.2	8747.64	98
		Symmetric	84236.5	33508.3	12664.9	7
	AB2-LIII-S3	Asymmetric	125658	95095.2	7687.99	153
		Symmetric	88915.5	43432.6	14477.5	9
	AB7-LIII-S1	Asymmetric	146399	112833	10614.4	113
		Symmetric	50467.3	14334.8	7167.4	4
	AB7-LIII-S2	Asymmetric	106721	75015.6	5839.96	165
		Symmetric	39558.2	32144.2	11364.7	8
	AB7-LIII-S3	Asymmetric	120060	95059.4	8121.48	137
		Symmetric	64921.9	43371.3	14457.1	9
	M16-LIII-S1	Asymmetric	146051	96337	9989.68	93
		Symmetric	106346	76162.2	21986.1	12
	M16-LIII-S2	Asymmetric	129657	82698.3	6558.4	159
		Symmetric	63055	29957.3	8308.65	13
	M16-LIII-S3	Asymmetric	111234	109064	8649.33	159
		Symmetric	50693.2	51742.6	19556.9	7
Vab	AB2-LVab-S1	Asymmetric	148106	93059.4	7701.65	146
		Symmetric	54602.6	36637.6	21152.7	3
	AB2-LVab-S2	Asymmetric	145891	78036.8	6595.31	140
		Symmetric	70587.3	42107.7	15915.2	7
	AB2-LVab-S3	Asymmetric	153033	94834.8	8254.31	132
		Symmetric	51921.4	30746.9	10870.7	8
	AB7-LVab-S1	Asymmetric	125387	80337.4	7524.29	114
		Symmetric	85661.5	32213.8	14406.4	5
	AB7-LVab-S2	Asymmetric	127294	92882.3	7583.81	150
		Symmetric	48962.4	11024.9	5512.43	4
	AB7-LVab-S3	Asymmetric	103238	57746.2	4730.75	149
		Symmetric	95350.6	41169.7	14555.7	8
	M16-LVab-S1	Asymmetric	154622	102719	10323.7	99
		Symmetric	78432.2	41176.8	18414.8	5
	M16-LVab-S2	Asymmetric	127350	90958.2	9924.36	84
		Symmetric	122094	103837	59950.6	3
	M16-LVab-S3	Asymmetric	140078	80443.3	7055.35	130
		Symmetric	64671.7	28406.5	10736.6	7
Vc	AB2-LVc-S1	Asymmetric	116309	70261.8	5222.52	181
		Symmetric	85946.5	47282.4	16716.8	8
	AB2-LVc-S2	Asymmetric	125473	82617.5	6745.69	150
		Symmetric	87211.4	50384.9	15933.1	10
	AB2-LVc-S3	Asymmetric	140443	96310.4	8025.87	144
		Symmetric	73486.3	8125.73	3633.94	5
	AB7-LVc-S1	Asymmetric	110863	74832.2	6069.69	152
		Symmetric	95647.7	40881.5	12927.9	10
	AB7-LVc-S2	Asymmetric	111534	67048.2	5385.44	155
		Symmetric	67001	28811.7	8687.05	11
	AB7-LVc-S3	Asymmetric	146657	78021.9	7687.73	103
		Symmetric	94210.5	45110.2	14265.1	10
	M16-LVc-S1	Asymmetric	147945	118160	11422.9	107
		Symmetric	112443	47744.7	13782.7	12
	M16-LVc-S2	Asymmetric	111772	71971.1	7899.85	83
		Symmetric	89490	29977.5	12238.3	6
	M16-LVc-S3	Asymmetric	125684	81268.4	6178.72	173
		Symmetric	80959.4	33893.2	9400.27	13
VI	AB2-LVI-S1	Asymmetric	110986	81763.5	7171.13	130
		Symmetric	48137.2	31889	18411.1	3
	AB2-LVI-S2	Asymmetric	95188.9	85270.9	7285.18	137
		Symmetric	74920.9	52076.5	21260.2	6
	AB2-LVI-S3	Asymmetric	124257	94030.6	7918.81	141
		Symmetric	123523	145494	84001.2	3
	AB7-LVI-S1	Asymmetric	84932.5	58495.8	5577.36	110
		Symmetric	42391.1	36194	14776.1	6
	AB7-LVI-S2	Asymmetric	76178.6	47486	3970.98	143
		Symmetric	18635.3	814.468	575.916	2
	AB7-LVI-S3	Asymmetric	69954.2	44613.9	4292.98	108
		Symmetric	53101.8	24287.8	8095.92	9
	M16-LVI-S1	Asymmetric	115768	65548.3	5705.25	132
		Symmetric	79343	65812.6	23268.3	8
	M16-LVI-S2	Asymmetric	117546	70818.4	6464.8	120
		Symmetric	84881	43979.7	15549.2	8
	M16-LVI-S3	Asymmetric	100594	70065.2	5627.77	155
		Symmetric	99350.2	43146	14382	9

## Sheet: SHAPE
LAYER	STACK	TYPE	No. MACULAR	SAS AREA (nm2) MACULAR	DESVEST	SE SAS AREA (nm2) MACULAR	No. PERFORATED	SAS AREA (nm2) PERFORATED	DESVEST	SE SAS AREA (nm2) PERFORATED	No. HORSESHOE-SHAPED	SAS AREA (nm2) HORSESHOE-SHAPED	DESVEST	SE SAS AREA (nm2) HORSESHOE-SHAPED	No. FRAGMENTED	SAS AREA (nm2) FRAGMENTED	DESVEST	SE SAS AREA (nm2) FRAGMENTED
I	AB2-LI-S1	Asymmetric	138	97289.5	48130.9	4097.17	13	125139	66392	18413.8	2	116061	23968.9	16948.6	0	0		0
		Symmetric	8	39567.6	29701.4	10501	2	53963.5	33030.9	23356.4	0	0		0	1	23526.3	#DIV/0!	-
	AB2-LI-S2	Asymmetric	99	99172.9	51068.7	5132.6	8	218387	108799	38466.3	2	234069	211304	149415	1	426413	#DIV/0!	-
		Symmetric	10	34861.3	14810.8	4683.58	0	0		0	0	0		0	1	162850	#DIV/0!	-
	AB2-LI-S3	Asymmetric	136	107202	55888.1	4792.37	22	211112	146540	31242.5	0	0		0	1	219471	#DIV/0!	-
		Symmetric	5	42096.9	21102.2	9437.21	3	64371.7	24535.1	14165.4	0	0		0	1	70463.5	#DIV/0!	-
	AB7-LI-S1	Asymmetric	130	96371.2	51896.4	4551.62	10	227920	96370.2	30474.9	5	283554	89908.9	40208.5	0	0		0
		Symmetric	7	53569.9	12983.5	4907.3	2	50280.6	11831.9	8366.44	0	0		0	0	0		0
	AB7-LI-S2	Asymmetric	132	86105.5	45834.8	3989.41	4	281192	175916	87957.9	1	492431	#DIV/0!	-	0	0		0
		Symmetric	4	58248.4	19357.2	9678.62	0	0		0	1	52189.8	#DIV/0!	-	1	36352.3	#DIV/0!	-
	AB7-LI-S3	Asymmetric	117	87422.5	56446.5	5218.48	23	129830	75640.3	15772.1	1	269885	#DIV/0!	-	0	0		0
		Symmetric	7	54472.8	53272.8	20135.2	1	105679	#DIV/0!	-	0	0		0	0	0		0
	M16-LI-S1	Asymmetric	85	92851.6	62579.5	6787.7	23	204085	105245	21945.2	1	234662	#DIV/0!	-	0	0		0
		Symmetric	4	25521.3	15079.8	7539.92	2	130613	55132.5	38984.5	0	0		0	1	41014.6	#DIV/0!	-
	M16-LI-S2	Asymmetric	121	74492.1	48286.5	4389.68	26	169938	88853.8	17425.7	4	128952	90569.6	45284.8	2	156347	34236.2	24208.6
		Symmetric	8	47182	28287.6	10001.2	2	69489.2	3060.59	2164.16	0	0		0	0	0		0
	M16-LI-S3	Asymmetric	142	93042.6	53144	4459.75	14	211285	94419.8	25234.7	1	247676	#DIV/0!	-	0	0		0
		Symmetric	9	63699	44367.9	14789.3	0	0		0	0	0		0	0	0		0
II-IS	AB2-LII-IS-S1	Asymmetric	132	132967	61607.6	5362.25	8	321812	164677	58222.1	1	286793	#DIV/0!	-	1	175889	#DIV/0!	-
		Symmetric	11	68752.3	28145.9	8486.31	0	0		0	1	50369.5	#DIV/0!	-	0	0		0
	AB2-LII-IS-S2	Asymmetric	142	118984	67633.6	5675.69	10	290411	93977.9	29718.4	1	470682	#DIV/0!	-	0	0		0
		Symmetric	12	88005.8	55499.2	16021.2	0	0		0	0	0		0	0	0		0
	AB2-LII-IS-S3	Asymmetric	118	138710	69351.1	6384.28	8	246489	90534.9	32008.9	2	142907	93774.6	66308.6	0	0		0
		Symmetric	9	64857.3	32125.4	10708.5	3	141358	93264.2	53846.1	0	0		0	1	62898.8	#DIV/0!	-
	AB7-LII-IS-S1	Asymmetric	103	90348.4	53328.9	5254.65	8	264061	102312	36172.7	3	112580	38504.1	22230.3	1	111859	#DIV/0!	-
		Symmetric	8	60136.5	22336	7896.97	0	0		0	0	0		0	0	0		0
	AB7-LII-IS-S2	Asymmetric	146	81889	52703.1	4361.74	12	212007	64107.7	18506.3	5	201114	56716.1	25364.2	1	151639	#DIV/0!	-
		Symmetric	6	52612.5	19641.8	8018.74	2	40445	23161	16377.3	0	0		0	0	0		0
	AB7-LII-IS-S3	Asymmetric	137	96032.7	54352.3	4643.63	6	222417	57187.1	23346.5	4	237424	70937.8	35468.9	1	234804	#DIV/0!	-
		Symmetric	13	47807.6	24465.9	6785.61	0	0		0	0	0		0	1	98224.2	#DIV/0!	-
	M16-LII-IS-S1	Asymmetric	108	100052	65526.3	6305.27	17	215704	81833	19847.4	3	201331	37110.2	21425.6	0	0		0
		Symmetric	9	90962.6	54010.7	18003.6	1	61309.7	#DIV/0!	0	0	0		0	0	0		0
	M16-LII-IS-S2	Asymmetric	103	84141.9	51199.9	5044.87	23	222815	90672.1	18906.4	3	173439	58309	33664.7	3	213303	102132	58965.9
		Symmetric	4	48376.8	10836.3	5418.15	2	63046.4	16806.3	11883.9	0	0		0	0	0		0
	M16-LII-IS-S3	Asymmetric	113	74769.7	42423.5	3990.86	21	235241	123611	26974.2	5	163650	97273	43501.8	1	352388	#DIV/0!	-
		Symmetric	14	66733.1	30564.7	8168.76	0	0		0	2	72579.3	31676	22398.3	0	0		0
II-NI	AB2-LII-NI-S1	Asymmetric	141	110577	60727.7	5114.19	10	243639	81189.2	25674.3	2	251626	122652	86728.3	1	273833	#DIV/0!	-
		Symmetric	8	60556.2	13863.3	4901.41	1	45204	#DIV/0!	-	2	117137	38925.8	27524.7	0	0		0
	AB2-LII-NI-S2	Asymmetric	116	127418	65070.9	6041.69	9	227450	112657	37552.2	2	382174	53187.7	37609.4	0	0		0
		Symmetric	4	101430	45087	22543.5	0	0		0	0	0		0	0	0		0
	AB2-LII-NI-S3	Asymmetric	133	106510	62930.5	5456.77	12	163395	53269.6	15377.6	1	175017	#DIV/0!	-	0	0		0
		Symmetric	10	63710.3	37359.4	11814.1	0	0		0	0	0		0	1	38486.7	#DIV/0!	-
	AB7-LII-NI-S1	Asymmetric	110	107575	65407.7	6236.38	8	219752	75611.4	26732.7	7	209109	96416.7	36442.1	0	0		0
		Symmetric	1	33207.4	#DIV/0!	-	1	135692	#DIV/0!	-	0	0		0	0	0		0
	AB7-LII-NI-S2	Asymmetric	166	78976.9	46427.1	3603.44	23	158309	47146.9	9830.81	3	220054	34217	19755.2	2	327890	84094.9	59464.1
		Symmetric	8	44569.5	14220.4	5027.66	3	55152.5	20710.3	11957.1	0	0		0	0	0		0
	AB7-LII-NI-S3	Asymmetric	142	83521.2	42858	3596.56	19	190614	60589.4	13900.2	2	242953	63741.4	45072	1	235374	#DIV/0!	-
		Symmetric	10	47930.4	18436.1	5830.02	2	34104.7	10841.5	7666.09	1	71960	#DIV/0!	-	0	0		0
	M16-LII-NI-S1	Asymmetric	115	109104	68894.2	6424.41	27	231650	92573.7	17815.8	3	261875	61755.8	35654.7	1	205622	#DIV/0!	-
		Symmetric	14	79290.9	44988.9	12023.8	4	142806	103331	51665.4	2	62748.4	42951.9	30371.6	0	0		0
	M16-LII-NI-S2	Asymmetric	104	101637	56344	5524.98	7	192694	81817.3	30924	1	238520	#DIV/0!	-	1	129283	#DIV/0!	-
		Symmetric	10	81282.1	27515	8701	1	31208.7	#DIV/0!	-	2	110864	16818.4	11892.4	0	0		0
	M16-LII-NI-S3	Asymmetric	83	101547	56468.9	6198.26	27	245770	98800.7	19014.2	6	172246	90043.7	36760.2	2	93062.1	85667.4	60576
		Symmetric	6	62150.8	24587	10037.6	6	86049.4	28458.2	11618	0	0		0	0	0		0
III	AB2-LIII-S1	Asymmetric	101	124752	74522.6	7415.27	31	263465	129387	23238.5	1	134985	#DIV/0!	-	1	367824	#DIV/0!	-
		Symmetric	4	129238	91308.4	45654.2	1	83238.3	#DIV/0!	-	0	0		0	0	0		0
	AB2-LIII-S2	Asymmetric	86	110690	66337.3	7153.33	8	243524	123146	43538.7	1	338316	#DIV/0!	-	3	242924	124121	71661.3
		Symmetric	4	81978	40474.4	20237.2	3	87247.8	29788.3	17198.3	0	0		0	0	0		0
	AB2-LIII-S3	Asymmetric	124	97345.7	61669.1	5538.05	23	235138	112508	23459.6	4	298734	171490	85744.8	2	275846	7842.06	5545.17
		Symmetric	7	92367.3	49069.5	18546.5	2	76834.3	16398.8	11595.7	0	0		0	0	0		0
	AB7-LIII-S1	Asymmetric	89	104659	65551.8	6948.48	21	304143	122718	26779.4	3	280464	86734	50075.9	0	0		0
		Symmetric	4	50467.3	14334.8	7167.4	0	0		0	0	0		0	0	0		0
	AB7-LIII-S2	Asymmetric	138	90571.4	59821.8	5092.37	21	192736	99526.5	21718.5	5	186389	52017.7	23263	1	130744	#DIV/0!	-
		Symmetric	6	30982.3	30575.8	12482.5	1	45371.1	#DIV/0!	-	0	0		0	1	85200.9	#DIV/0!	-
	AB7-LIII-S3	Asymmetric	108	84264.8	53070.7	5106.73	20	253750	98711.3	22072.5	7	272274	112593	42556.1	2	183353	18459.3	13052.7
		Symmetric	8	65765.4	46286.9	16364.9	0	0		0	0	0		0	1	58174	#DIV/0!	-
	M16-LIII-S1	Asymmetric	56	93552.6	49372.1	6597.63	30	223897	97687.8	17835.3	6	237908	103349	42192	1	199433	#DIV/0!	-
		Symmetric	7	65554.8	28091.5	10617.6	3	126595	52182.7	30127.7	1	130754	#DIV/0!	-	1	306729	#DIV/0!	-
	M16-LIII-S2	Asymmetric	129	108094	63489.2	5589.91	26	227800	92166.3	18075.3	3	147139	68773.6	39706.5	1	307014	#DIV/0!	-
		Symmetric	9	56102.8	24126	8041.99	3	90339.6	39195.3	22629.4	1	43771	#DIV/0!	-	0	0		0
	M16-LIII-S3	Asymmetric	125	73759.2	51225.7	4581.76	31	255659	150092	26957.3	2	96938.5	3872.4	2738.2	1	347042	#DIV/0!	-
		Symmetric	6	40201.1	47833.6	19528	1	113646	#DIV/0!	-	0	0		0	0	0		0
Vab	AB2-LVab-S1	Asymmetric	115	120556	71610.1	6677.67	27	247523	87014.2	16745.9	2	212451	209700	148281	2	325778	68719.3	48591.9
		Symmetric	1	12297.9	#DIV/0!	-	2	75755	310.294	219.411	0	0		0	0	0		0
	AB2-LVab-S2	Asymmetric	121	133577	68687.4	6244.31	16	208940	80830.1	20207.5	1	297392	#DIV/0!	-	2	310771	151795	107335
		Symmetric	4	53674.5	48442.5	24221.2	2	93224.8	30472	21546.9	0	0		0	1	92963.3	#DIV/0!	-
	AB2-LVab-S3	Asymmetric	97	116957	60758.2	6169.06	33	251583	102862	17906	1	213780	#DIV/0!	-	1	339496	#DIV/0!	-
		Symmetric	5	49721.1	30193.9	13503.1	2	63530.8	50278.3	35552.1	1	39704.2	#DIV/0!	-	0	0		0
	AB7-LVab-S1	Asymmetric	100	108854	60410.5	6041.05	10	258735	99234	31380.5	4	205333	127380	63689.8	0	0		0
		Symmetric	4	74941.4	24849.5	12424.8	0	0		0	0	0		0	1	128542	#DIV/0!	-
	AB7-LVab-S2	Asymmetric	119	96850.3	59362.1	5441.71	21	234275	105319	22982.4	6	236124	107103	43724.8	4	308106	112485	56242.4
		Symmetric	4	48962.4	11024.9	5512.43	0	0		0	0	0		0	0	0		0
	AB7-LVab-S3	Asymmetric	138	95429.1	50608.2	4308.06	8	209834	61206.4	21639.7	2	182446	11633.8	8226.33	1	169707	#DIV/0!	-
		Symmetric	6	78360.2	24329.8	9932.62	0	0		0	0	0		0	2	146322	44460.3	31438.1
	M16-LVab-S1	Asymmetric	82	125676	75838.5	8374.96	13	317711	99685.7	27647.8	4	217989	78239	39119.5	0	0		0
		Symmetric	4	87671.2	41129.7	20564.8	0	0		0	1	41476.4	#DIV/0!	-	0	0		0
	M16-LVab-S2	Asymmetric	70	107579	68675.9	8208.34	10	235404	135597	42879.5	3	227371	104025	60059	1	130686	#DIV/0!	-
		Symmetric	3	122094	103837	59950.6	0	0		0	0	0		0	0	0		0
	M16-LVab-S3	Asymmetric	91	110604	55033.6	5769.09	29	215159	91163.8	16928.7	7	192255	89146.7	33694.3	3	186603	82838.5	47826.8
		Symmetric	6	59067.5	26542.4	10835.9	1	98296.8	#DIV/0!	-	0	0		0	0	0		0
Vc	AB2-LVc-S1	Asymmetric	165	105558	57365.1	4465.87	7	234025	107850	40763.3	6	222382	69428.4	28344	3	220784	139122	80322.3
		Symmetric	5	70903.9	23678	10589.1	3	111017	72075.4	41612.7	0	0		0	0	0		0
	AB2-LVc-S2	Asymmetric	127	106962	69722.9	6186.91	16	213371	49648.2	12412.1	4	295475	140327	70163.5	3	213643	34583.6	19966.9
		Symmetric	6	71236.1	51659.7	21090	3	123279	44258.5	25552.7	1	74858.9	#DIV/0!	-	0	0		0
	AB2-LVc-S3	Asymmetric	123	113785	65230.3	5881.61	18	289360	105953	24973.3	1	388495	#DIV/0!	-	2	315669	83389.6	58965.3
		Symmetric	5	73486.3	8125.73	3633.94	0	0		0	0	0		0	0	0		0
	AB7-LVc-S1	Asymmetric	141	99270.2	61450	5175.02	5	231906	34636.6	15489.9	4	267862	116523	58261.6	2	311580	4092.62	2893.92
		Symmetric	10	95647.7	40881.5	12927.9	0	0		0	0	0		0	0	0		0
	AB7-LVc-S2	Asymmetric	139	102406	56906.1	4826.72	10	219521	94015.3	29730.2	4	138441	101237	50618.3	2	152138	27037.2	19118.2
		Symmetric	10	69339.4	29249.2	9249.41	0	0		0	1	43616.9	#DIV/0!	-	0	0		0
	AB7-LVc-S3	Asymmetric	88	133907	67099.2	7152.8	12	211945	102065	29463.6	3	259507	74046.5	42750.8	0	0		0
		Symmetric	9	93258	47739.9	15913.3	0	0		0	1	102783	#DIV/0!	-	0	0		0
	M16-LVc-S1	Asymmetric	96	128049	78747.3	8037.11	6	359085	310866	126911	4	254220	56060.9	28030.5	1	366024	0	-
		Symmetric	10	108870	51421.6	16260.9	2	130305	22622.7	15996.7	0	0	0	-	0	0	0	-
	M16-LVc-S2	Asymmetric	59	80916.6	47352	6164.7	17	186421	58286.2	14136.5	5	154368	71649.4	32042.6	2	281012	50482.6	35696.6
		Symmetric	4	97301.8	33921.9	16961	1	61439.3	#DIV/0!	-	0	0		0	1	86293.5	#DIV/0!	-
	M16-LVc-S3	Asymmetric	143	105029	59661.5	4989.15	19	216982	99194.6	22756.8	6	213033	105361	43013.6	5	264673	95086.8	42524.1
		Symmetric	10	68538.9	27696	8758.25	1	132877	#DIV/0!	-	0	0		0	2	117103	5518.62	3902.25
VI	AB2-LVI-S1	Asymmetric	107	91666.9	58878.9	5692.04	12	249631	85126.1	24573.8	5	100436	82038.9	36688.9	6	187020	128409	52422.9
		Symmetric	3	48137.2	31889	18411.1	0	0		0	0	0		0	0	0		0
	AB2-LVI-S2	Asymmetric	114	73988.6	53965.9	5054.37	12	198673	109117	31499.4	8	211433	130592	46171.3	3	176881	225344	130102
		Symmetric	2	40044.3	35183.6	24878.6	2	89833.3	91585.8	64760.9	2	94884.9	16104.5	11387.6	0	0		0
	AB2-LVI-S3	Asymmetric	108	93027.6	67801.3	6524.19	23	213681	98010	20436.5	6	219567	96186.5	39268	4	310293	45391.2	22695.6
		Symmetric	1	29578.9	#DIV/0!	-	2	170495	170584	120621	0	0		0	0	0		0
	AB7-LVI-S1	Asymmetric	81	68964	46138.4	5126.49	26	124987	62484.8	12254.3	2	188228	138889	98209.2	1	130366	#DIV/0!	-
		Symmetric	4	29877.1	28948.2	14474.1	1	100258	#DIV/0!	-	1	34580.1	#DIV/0!	-	0	0		0
	AB7-LVI-S2	Asymmetric	109	62615.1	37685.4	3609.61	24	123650	53239.7	10867.5	6	113029	48139.6	19652.9	4	105678	37734.4	18867.2
		Symmetric	2	18635.3	814.468	575.916	0	0		0	0	0		0	0	0		0
	AB7-LVI-S3	Asymmetric	90	57974.1	30982.3	3265.82	15	116730	47828.3	12349.2	2	194207	50013.5	35364.9	1	198019	#DIV/0!	-
		Symmetric	5	35818.5	14669.6	6560.43	3	80511.7	6832.78	3944.91	1	57289	#DIV/0!	-	0	0		0
	M16-LVI-S1	Asymmetric	99	97106.9	56913.4	5720.01	22	162856	54139.6	11542.6	3	197174	56878.5	32838.8	8	186685	69718	24649
		Symmetric	5	47302.3	35469.7	15862.5	2	153412	95055.4	67214.3	0	0		0	1	91407.7	#DIV/0!	-
	M16-LVI-S2	Asymmetric	84	89746.9	48110.5	5249.28	23	163445	65618.7	13682.4	7	207408	75297.6	28459.8	6	225941	84333.8	34429.1
		Symmetric	5	68678.8	44599.2	19945.4	1	140734	#DIV/0!	-	0	0		0	2	97459.8	28888.4	20427.2
	M16-LVI-S3	Asymmetric	121	78893.1	52993.9	4817.63	24	163371	65148.1	13298.3	6	218525	64175.8	26199.7	4	203471	88402.5	44201.3
		Symmetric	5	79456.3	21227.8	9493.35	3	98748.6	20661.3	11928.8	0	0		0	1	200624	#DIV/0!	-

## Sheet: POSTSYNAPTIC
LAYER	STACK	TYPE	No. SPINE HEAD	SAS AREA (nm2) SPINE HEAD	DESVEST	SE SAS AREA (nm2) SPINE HEAD	No. SPINE NECK	SAS AREA (nm2) SPINE NECK	DESVEST	SE SAS AREA (nm2) SPINE NECK	No. SPINY SHAFT	SAS AREA (nm2) SPINY SHAFT	DESVEST	SE SAS AREA (nm2) SPINY SHAFT	No. ASPINY SHAFT	SAS AREA (nm2) ASPINY SHAFT	DESVEST	SE SAS AREA (nm2) ASPINY SHAFT
I	AB2-LI-S1	Asymmetric	69	105394	58441.1	7035.48	0	0	0	0	24	106752	28932.4	5905.8	40	97559.4	47397.2	7494.16
		Symmetric	0	0	0	0	1	43604.4	#DIV/0!	-	1	10955.9	#DIV/0!	-	8	48206.9	28019.1	9906.26
	AB2-LI-S2	Asymmetric	57	118185	76897.2	10185.3	0	0	0	0	17	128116	75250.3	18250.9	26	91231.1	48740.4	9558.78
		Symmetric	0	0	0	0	0	0	0	0	1	50263.2	#DIV/0!	-	10	46120	43270	13683.2
	AB2-LI-S3	Asymmetric	84	137821	114291	12470.2	1	92839	#DIV/0!	-	28	119870	33901.1	6406.7	38	102978	37773.7	6127.7
		Symmetric	0	0	0	0	0	0	0	0	3	67926.4	16651.2	9613.58	5	41921.9	24377.4	10901.9
	AB7-LI-S1	Asymmetric	74	126874	88602.4	10299.8	2	79858.8	8811.98	6231.01	27	95611.2	43290.3	8331.21	30	117656	59125.2	10794.7
		Symmetric	2	0	0	0	0	0	0	0	4	44022.9	3545.71	1772.85	3	60985.7	3753.97	2167.35
	AB7-LI-S2	Asymmetric	74	102067	92305.8	10730.3	2	31806.8	24750.4	17501.2	18	79386.9	41660.5	9819.48	33	101139	50137.7	8727.85
		Symmetric	0	0	0	0	1	36352.3	#DIV/0!	-	3	60803.9	22866.4	13201.9	2	51385.9	1136.99	803.97
	AB7-LI-S3	Asymmetric	77	116970	76114.1	8674.01	0	0	0	0	24	94175.1	51776.3	10568.8	32	84185.4	47671.5	8427.21
		Symmetric	3	0	0	0	0	0	0	0	0	0	0	0	3	39651.2	25071.5	14475
	M16-LI-S1	Asymmetric	62	155564	110850	14078	0	0	0	0	19	106878	60395.6	13855.7	18	112044	59973.4	14135.9
		Symmetric	1	0	0	0	0	0	0	0	3	53593.6	35153.8	20296.1	3	24649.2	15073.5	8702.66
	M16-LI-S2	Asymmetric	92	100926	78335.2	8167.01	0	0	0	0	30	81861.1	51059.3	9322.12	23	75990.1	35858.3	7476.97
		Symmetric	0	0	0	0	0	0	0	0	8	50439.9	23304.6	8239.43	2	56457.7	50469.5	35687.3
	M16-LI-S3	Asymmetric	86	107940	78998.3	8518.61	0	0	0	0	31	105228	48770.2	8759.38	33	104446	45015.1	7836.12
		Symmetric	1	161971	#DIV/0!	-	1	48307.4	#DIV/0!	-	0	0	0	0	7	51859	28497.4	10771
II-IS	AB2-LII-IS-S1	Asymmetric	77	158683	92793.1	10574.8	0	0	0	0	15	133144	68785.9	17760.4	47	140482	46059.5	6718.47
		Symmetric	1	55204.6	#DIV/0!	-	1	66768.5	#DIV/0!	-	6	69852	33829.6	13810.9	4	66390	27812.4	13906.2
	AB2-LII-IS-S2	Asymmetric	82	142817	112824	12459.4	1	158471	#DIV/0!	-	22	121019	42502.6	9061.59	38	133121	52340.1	8490.69
		Symmetric	1	69335.6	#DIV/0!	-	0	0	0	0	5	118189	74122.6	33148.6	6	65965.2	28589.6	11671.7
	AB2-LII-IS-S3	Asymmetric	66	150353	84180.3	10361.9	0	0	0	0	21	143742	57512.1	12550.2	34	142658	56162.7	9631.83
		Symmetric	2	142113	146111	103316	0	0	0	0	8	68105.3	34620.1	12240.1	3	80539.5	18920.2	10923.6
	AB7-LII-IS-S1	Asymmetric	64	113515	86454.1	10806.8	2	62330.9	54186.6	38315.7	27	118599	53743	10342.8	15	87362	33396.9	8623.04
		Symmetric	1	47834.8	#DIV/0!	-	0	0	0	0	5	69168.7	21958.4	9820.09	2	43706.9	21552.3	15239.7
	AB7-LII-IS-S2	Asymmetric	103	100969	61435.9	6053.46	0	0	0	0	30	94390.8	71624.6	13076.8	22	99698.3	75341.7	16062.9
		Symmetric	1	56822.3	#DIV/0!	-	0	0	0	0	4	50861.2	18257.7	9128.87	2	56114.9	29869.2	21120.7
	AB7-LII-IS-S3	Asymmetric	83	114994	73708.5	8090.56	3	46971.8	14543.4	8396.62	25	119484	56474.6	11294.9	34	98096	50692.6	8693.71
		Symmetric	2	61963	27450.5	19410.4	0	0	0	0	5	52407.9	28878.4	12914.8	7	47679.5	29236.7	11050.4
	M16-LII-IS-S1	Asymmetric	83	121430	85372.3	9370.83	1	62059.6	#DIV/0!	-	9	86805.5	29018	9672.65	28	105640	55476.6	10484.1
		Symmetric	2	72785.2	#DIV/0!	-	0	0	0	0	4	106305	48076.2	24038.1	4	87260.9	64774.4	32387.2
	M16-LII-IS-S2	Asymmetric	101	117989	91722.4	9126.72	0	0	0	0	16	129358	59243.7	14810.9	8	80559.6	56132.2	19845.7
		Symmetric	0	0	0	0	0	0	0	0	6	53266.6	13576.9	5542.74	0	0	0	0
	M16-LII-IS-S3	Asymmetric	81	111754	104555	11617.2	1	63714.1	#DIV/0!	-	37	108567	60747.6	9986.84	14	105616	46359.3	12390
		Symmetric	4	38592.7	8168.58	4084.29	1	74991.9	#DIV/0!	-	7	67936.5	25488.4	9633.71	4	93626.1	31514.1	15757
II-NI	AB2-LII-NI-S1	Asymmetric	89	140677	89973.9	9537.21	1	76356	#DIV/0!	-	27	119285	43132.6	8300.87	33	119341	59011.1	10272.5
		Symmetric	0	0	0	0	0	0	0	0	6	80608.1	36443.8	14878.1	5	56055.6	9279.51	4149.92
	AB2-LII-NI-S2	Asymmetric	74	162035	99844.7	11606.7	0	0	0	0	17	166656	70291	17048.1	35	108571	55663.5	9408.85
		Symmetric	1	158933	#DIV/0!	-	0	0	0	0	1	115825	#DIV/0!	-	2	65481.2	91.6818	64.8289
	AB2-LII-NI-S3	Asymmetric	77	100229	65160.2	7425.69	0	0	0	0	34	140595	61103.8	10479.2	33	112754	62812.2	10934.2
		Symmetric	0	0	0	0	0	0	0	0	4	37746.2	19404.4	9702.19	7	74943.6	37612.8	14216.3
	AB7-LII-NI-S1	Asymmetric	87	119707	67490.1	7235.69	0	0	0	0	23	152856	81275.7	16947.1	9	97699.4	61599	20533
		Symmetric	1	33207.4	#DIV/0!	-	0	0	0	0	0	0	0	0	1	135692	#DIV/0!	-
	AB7-LII-NI-S2	Asymmetric	118	103255	61527	5664.02	0	0	0	0	28	102198	38019.3	7184.97	38	69574.7	37827.4	6136.42
		Symmetric	1	31350	#DIV/0!	-	0	0	0	0	4	53363.2	17284.4	8642.2	6	46201.7	15576	6358.87
	AB7-LII-NI-S3	Asymmetric	94	98622.8	61337.5	6326.48	1	68166.4	#DIV/0!	-	35	127168	60152.7	10167.7	27	75649.6	40249.9	7746.09
		Symmetric	2	39028.6	28552.4	20189.6	1	37320	#DIV/0!	-	6	56737.1	21724.7	8869.08	4	40918.4	3062.76	1531.38
	M16-LII-NI-S1	Asymmetric	119	144023	94792	8689.57	0	0	0	0	16	158025	78993.3	19748.3	8	127766	55338.7	19565.2
		Symmetric	1	0	0	0	0	0	0	0	17	91154.7	66209.3	16058.1	2	61679.3	27367.4	19351.7
	M16-LII-NI-S2	Asymmetric	65	100357	63385.2	7861.97	1	63233.2	#DIV/0!	-	19	140595	64687.4	14840.3	24	122054	50400.6	10288
		Symmetric	1	31208.7	#DIV/0!	-	0	0	0	0	9	94219.9	27846.1	9282.05	2	60930	5816.49	4112.88
	M16-LII-NI-S3	Asymmetric	75	152623	109228	12612.6	0	0	0	0	18	143218	91550.3	21578.6	22	144164	70088.1	14942.8
		Symmetric	0	0	0	0	1	48776.9	#DIV/0!	-	9	69494.4	26715.9	8905.3	1	110122	#DIV/0!	-
III	AB2-LIII-S1	Asymmetric	74	165601	137277	15958.1	0	0	0	0	28	181705	75916.3	14346.8	25	159128	89861	17972.2
		Symmetric	1	249328	#DIV/0!	-	0	0	0	0	2	120253	75.8968	53.6672	2	55178.1	39683.1	28060.2
	AB2-LIII-S2	Asymmetric	49	143066	108731	15533	0	0	0	0	15	135188	61473.2	15872.3	25	141810	66099.2	13219.8
		Symmetric	0	0	0	0	0	0	0	0	2	96852.7	18935.2	13389.2	5	79190	38511.8	17223
	AB2-LIII-S3	Asymmetric	89	135105	115611	12254.7	0	0	0	0	34	133175	56143.5	9628.54	21	136914	110963	24214
		Symmetric	0	0	0	0	0	0	0	0	7	86169	49058.7	18542.4	1	112898	#DIV/0!	-
	AB7-LIII-S1	Asymmetric	71	174084	133768	15875.3	1	24183.3	#DIV/0!	-	16	186186	92959.8	23239.9	17	106135	57934.7	14051.2
		Symmetric	2	0	0	0	0	0	0	0	2	57277.8	4679.13	3308.65	0	0	0	0
	AB7-LIII-S2	Asymmetric	84	112345	85350.8	9312.53	2	78036.4	1324.06	936.248	34	112484	48731.5	8357.38	35	111700	53236	8998.52
		Symmetric	2	54269	43744.4	30932	0	0	0	0	0	0	0	0	5	36187.7	34174.4	15283.3
	AB7-LIII-S3	Asymmetric	68	142749	105666	12813.9	0	0	0	0	21	129646	82242.2	17946.7	44	77857.6	41308.9	6227.54
		Symmetric	0	0	0	0	0	0	0	0	2	55727.3	3460.12	2446.68	7	67548.9	49697.8	18784
	M16-LIII-S1	Asymmetric	59	157244	107239	13961.3	1	112276	#DIV/0!	-	21	116548	63983.1	13962.2	8	132896	53634.3	18962.6
		Symmetric	3	60805.3	4913.68	2836.92	0	0	0	-	8	130620	84138.5	29747.5	1	49779.7	#DIV/0!	-
	M16-LIII-S2	Asymmetric	60	150782	105029	13559.1	0	0		0	52	122173	71814.4	9958.87	39	133094	56076.6	8979.45
		Symmetric	1	87594.1	#DIV/0!	-	0	0	0	0	7	60498.9	17328.3	6549.48	5	61725.8	45582.1	20384.9
	M16-LIII-S3	Asymmetric	113	107410	112156	10550.8	2	64951.5	4463.99	3156.52	34	141491	131545	22559.7	4	144884	101140	50570
		Symmetric	0	0	0	0	0	0	0	0	7	50693.2	51742.6	19556.9		0	0	0
Vab	AB2-LVab-S1	Asymmetric	75	154459	108163	12489.6	3	73309.9	74925	43258	31	158229	63822.4	11462.8	19	159930	78762	18069.2
		Symmetric	0	0	0	0	1	12297.9	#DIV/0!	-	1	75974.4	#DIV/0!	-	1	75535.6	#DIV/0!	-
	AB2-LVab-S2	Asymmetric	52	182274	94220.4	13066	2	64282.5	14456.6	10222.3	32	163642	62532.2	11054.2	41	135945	62627.1	9780.71
		Symmetric	1	71677.9	-	-	0	0	0	0	3	53729.9	40429.5	23342	1	120929	#DIV/0!	-
	AB2-LVab-S3	Asymmetric	76	163527	100247	11499.1	2	103010	89734	63451.5	26	175091	70492.8	13824.8	14	156283	80183.6	21430
		Symmetric	0	0	0	0	0	0	0	0	5	61923.2	34149.6	15272.2	1	31724.3	#DIV/0!	-
	AB7-LVab-S1	Asymmetric	50	144678	100979	14280.7	1	134042	#DIV/0!	-	33	131793	77033.8	13409.9	22	131425	74149.9	15808.8
		Symmetric	0	0	0	0	0	0	0	0	4	74941.4	24849.5	12424.8	1	128542	#DIV/0!	-
	AB7-LVab-S2	Asymmetric	101	129653	87645.6	8721.07	0	0	0	0	25	140315	79788.1	15957.6	16	121940	94954.4	23738.6
		Symmetric	0	0	0	0	1	53334.3	#DIV/0!	-	1	33116.9	#DIV/0!	-	2	54699.2	5350.58	3783.43
	AB7-LVab-S3	Asymmetric	89	109623	60279.1	6389.57	1	69909.7	#DIV/0!	-	27	96941.7	54316.2	10453.2	26	113124	57318.3	11241
		Symmetric	0	0	0	0	0	0	0	0	2	69010.2	32911.5	23271.9	5	113379	39891.2	17839.9
	M16-LVab-S1	Asymmetric	46	169798	121724	17947.2	1	13583	#DIV/0!	-	12	209547	56702.9	16368.7	30	155016	68136.7	12440
		Symmetric	0	0	0	0	0	0	0	0	1	41476.4	#DIV/0!	-		0	0	0
	M16-LVab-S2	Asymmetric	36	136214	99100.7	16516.8	1	12575.3	#DIV/0!	-	21	139655	53856	11752.3	16	128247	75936.3	18984.1
		Symmetric	0	0	0	0	0	0	0	0	1	53691.8	#DIV/0!	-	1	71012.1	#DIV/0!	-
	M16-LVab-S3	Asymmetric	46	148341	102610	15129	0	0	0	0	25	145487	73271.8	14654.4	42	132971	59083.9	9116.84
		Symmetric	0	0	0	0	0	0	0	0	1	72573.7	#DIV/0!	-	5	69225.5	30556.3	13665.2
Vc	AB2-LVc-S1	Asymmetric	109	122205	87833.2	8412.89	1	75795.4	#DIV/0!	-	19	148345	91048.5	20887.9	41	136871	67584.7	10555
		Symmetric	2	51382.5	-	-	0	0	0	0	3	126449	58059.7	33520.8	2	66106	28501.3	20153.4
	AB2-LVc-S2	Asymmetric	85	145388	84174.2	9129.97	1	61990.6	#DIV/0!	-	25	115703	74665	14933	33	122261	77316.9	13459.2
		Symmetric	1	46391.1	#DIV/0!	-	0	0	0	0	4	76489.7	37750.4	18875.2	5	103953	61329	27427.2
	AB2-LVc-S3	Asymmetric	101	150147	112592	11203.3	1	33121	#DIV/0!	-	14	146276	63562.5	16987.8	21	127508	58771.2	12824.9
		Symmetric	1	0	0	0	0	0	0	0	1	69663.3	#DIV/0!	-	3	72594.3	10121.1	5843.41
	AB7-LVc-S1	Asymmetric	95	109225	61157.3	6274.61	1	25890.1	#DIV/0!	-	19	125410	63943.7	14669.7	19	101211	52163.8	11967.2
		Symmetric	2	53487.8	#DIV/0!	-	0	0	0	0	4	117913	44347.7	22173.8	3	105338	31005.6	17901.1
	AB7-LVc-S2	Asymmetric	102	106660	68150.2	6747.88	2	78441.7	32488.5	22972.8	39	122038	54170.4	8674.2	5	147525	118255	52885.2
		Symmetric	1	118153	#DIV/0!	-	0	0	0	0	8	59043.7	17909.9	6332.1	2	73254.5	53427.7	37779.1
	AB7-LVc-S3	Asymmetric	61	137473	67373.7	8626.32	0	0	0	0	20	142185	64049.1	14321.8	14	181806	108465	28988.5
		Symmetric	3	82305.9	50133.4	28944.6	0	0	0	0	2	131625	40789.2	28842.3	5	86387.5	44980.7	20116
	M16-LVc-S1	Asymmetric	52	149670	112429	15591.1	1	84617.2	0	-	14	163207	85395.6	22822.9	34	128450	53527.9	9179.96
		Symmetric	3	116540	55371.8	31968.9	1	115738	0	-	4	140327	28470.3	14235.2	4	80662.1	55677.4	27838.7
	M16-LVc-S2	Asymmetric	58	105935	69201.7	9086.63	0	0	0	0	5	139431	50449.2	22561.6	17	106924	60461.6	14664.1
		Symmetric	2	103568	24430.1	17274.7	0	0	0	0	1	57619.7	#DIV/0!	-	3	90728	35211.6	20329.4
	M16-LVc-S3	Asymmetric	98	128257	79050.7	7985.33	2	63243.7	24292.9	17177.6	28	118155	69015.3	13042.7	39	134996	84276.4	13495
		Symmetric	3	64880	27200.4	15704.1	0	0	0	0	6	89784.3	32536.5	13283	3	95217.7	38107.3	22001.3
VI	AB2-LVI-S1	Asymmetric	87	122193	96122.2	10305.4	1	55172.8	#DIV/0!	-	18	110932	54436.7	12830.8	6	126065	103697	42334.1
		Symmetric	0	0	0	0	0	0	0	0	1	78527.2	#DIV/0!	-	1	14935.5	#DIV/0!	-
	AB2-LVI-S2	Asymmetric	96	94804.8	94056.9	9599.64	1	55762	#DIV/0!	-	8	59759.4	47817.9	16906.2	15	118896	62330.2	16093.6
		Symmetric	0	0	0	0	0	0	0	0	1	154594	#DIV/0!	-	5	58986.2	38543.5	17237.2
	AB2-LVI-S3	Asymmetric	95	154539	104560	10727.6	0	0	0	0	16	125164	62058.3	15514.6	13	158542	84031.6	23306.2
		Symmetric	0	0	0	0	0	0	0	0	3	123523	145494	84001.2	0	0	0	0
	AB7-LVI-S1	Asymmetric	81	82406.1	51491.6	5721.28	0	0	0	0	16	83564.9	52058.4	13014.6	9	70445.5	39473.4	13157.8
		Symmetric	1	14955.9	#DIV/0!	-	0	0	0	0	4	56957.2	36506.6	18253.3	0	0	0	0
	AB7-LVI-S2	Asymmetric	98	84030.5	55795.5	5636.2	0	0	0	0	10	68735.9	23385.4	7395.11	28	58515.8	26260	4962.67
		Symmetric	0	0	0	0	0	0	0	0	0	0	0	0	1	19211.2	#DIV/0!	-
	AB7-LVI-S3	Asymmetric	85	72957.3	39828.1	4319.97	0	0	0	0	6	45395.6	14651.8	5981.56	12	80946.9	47654.3	13756.6
		Symmetric	2	51534.7	#DIV/0!	-	0	0	0	0	6	54767.4	30078	12279.3	1	40488.5	#DIV/0!	-
	M16-LVI-S1	Asymmetric	90	123900	68868.2	7259.34	0	0	0	0	15	142243	82087.9	21195	9	129733	40387.9	13462.6
		Symmetric	2	0	0	0	1	52193.2	#DIV/0!	-	1	91407.7	#DIV/0!	-	2	53329.9	68282.8	48283.2
	M16-LVI-S2	Asymmetric	93	116076	77348.4	8020.66	1	35916.6	#DIV/0!	-	7	153295	76664.5	28976.4	8	112845	37280.4	13180.6
		Symmetric	0	0	0	0	0	0	0	0	2	109177	44628.9	31557.4	4	80989.6	40236.5	20118.2
	M16-LVI-S3	Asymmetric	125	102628	72320.3	6468.52	0	0	0	0	10	108673	76754.5	24271.9	9	96504.6	43534.8	14511.6
		Symmetric	1	0	0	0	0	0	0	0	6	105739	49803.1	20332	2	93198.4	38634.6	27318.8
